# Supplementary material for: Copper-catalyzed cascade C–N coupling/C–H amination: one pot synthesis of imidazo[1,2-b]indazole
Source: Royal Society of Chemistry journal article supplement (doi:10.1039/d0nj03022h), 2020-01-01

## Electronic Supplementary Information

### Copper-catalyzed cascade C–N coupling/C–H amination: One pot synthesis of imidazo[1,2-*b*]indazole

Bandari Rajesham, Vemula Arunkumar, Praveen Kumar Naikawadi, K. Shiva Kumar\*

Department of Chemistry, Osmania University, Hyderabad-500 007, India.

E-mail: shivakumarkota@yahoo.co.in, shivakumarkota@osmaia.ac.in; Tel: +91 40 27682337

#### Table of contentPage No

|                                                                                                     |    |
|-----------------------------------------------------------------------------------------------------|----|
| 1. Table S1: Copper-catalyzed one pot cascade synthesis of imidazo[1,2- <i>b</i> ]indazole (3)..... | 2  |
| 2. Chemistry: General methods.....                                                                  | 6  |
| 3. General procedure for the synthesis of 2-(2 <i>H</i> -indazol-2-yl)anilines (1a-1c).....         | 6  |
| 4. Analytical data of 1a-1c.....                                                                    | 7  |
| 5. Procedure for the synthesis of 2-(2 <i>H</i> -indazol-2-yl)- <i>N</i> -methylaniline (1A).....   | 7  |
| 6. General procedure for the synthesis of imidazo[1,2- <i>b</i> ]indazoles (3aa-3ca).....           | 8  |
| 7. Analytical data of 3aa-3ca.....                                                                  | 8  |
| 8. References .....                                                                                 | 16 |
| 9. Copies of <sup>1</sup> H and <sup>13</sup> C NMR spectra of compounds.....                       | 17 |

**Table S1: Copper-catalyzed one pot cascade synthesis of imidazo[1,2-*b*]indazole (3).<sup>a</sup>**

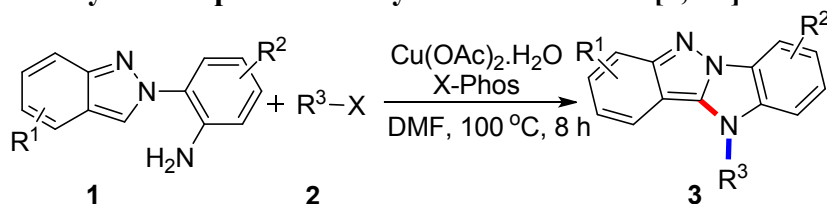

| S.No | 2-(2 <i>H</i> -Indazol-2-yl)aniline (1)                                                        | Aryl/heteroaryl/alkyl halides (2)                                                                | Imidazo[1,2- <i>b</i> ]indazoles (3)                                                                | Yield <sup>b</sup> (%) |
|------|------------------------------------------------------------------------------------------------|--------------------------------------------------------------------------------------------------|-----------------------------------------------------------------------------------------------------|------------------------|
| 1    | 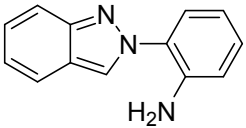<br><b>1a</b> | 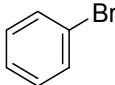<br><b>2a</b>   | 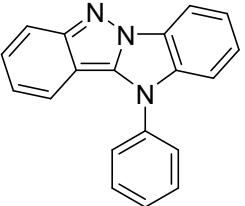<br><b>3aa</b>   | 72                     |
| 2    | <b>1a</b>                                                                                      | 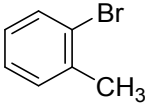<br><b>2b</b>  | 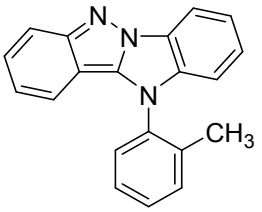<br><b>3ab</b>  | 68                     |
| 3    | <b>1a</b>                                                                                      | 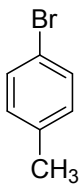<br><b>2c</b> | 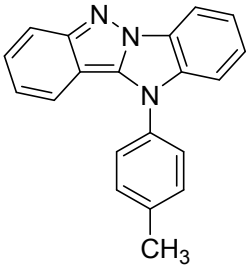<br><b>3ac</b> | 70                     |
| 4    | <b>1a</b>                                                                                      | 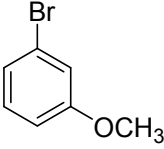<br><b>2d</b> | 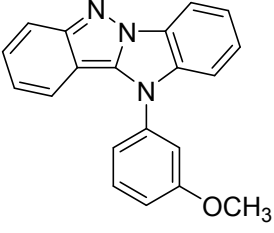<br><b>3ad</b> | 72                     |

|    |    |                                                                                                      |                                                                                                         |    |
|----|----|------------------------------------------------------------------------------------------------------|---------------------------------------------------------------------------------------------------------|----|
| 5  | 1a | 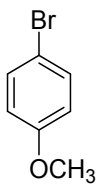 <p><b>2e</b></p>   | 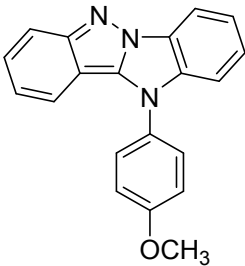 <p><b>3ae</b></p>   | 70 |
| 6  | 1a | 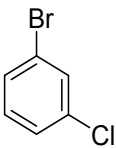 <p><b>2f</b></p>   | 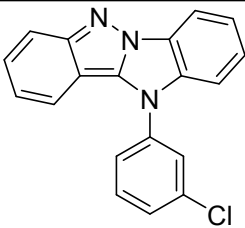 <p><b>3af</b></p>   | 70 |
| 7  | 1a | 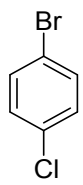 <p><b>2g</b></p>   | 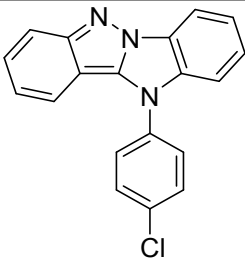 <p><b>3ag</b></p>  | 68 |
| 8  | 1a | 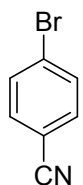 <p><b>2h</b></p> | 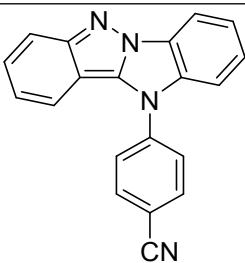 <p><b>3ah</b></p> | 70 |
| 9  | 1a | 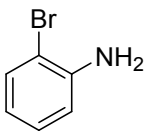 <p><b>2i</b></p> | 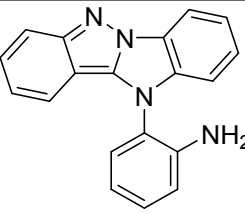 <p><b>3ai</b></p> | 65 |
| 10 | 1a | 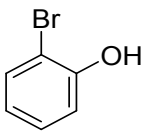 <p><b>2j</b></p> | 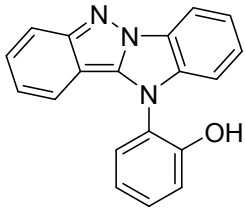 <p><b>3aj</b></p> | 65 |

|    |                                                                                                |                                                                                                |                                                                                                    |    |
|----|------------------------------------------------------------------------------------------------|------------------------------------------------------------------------------------------------|----------------------------------------------------------------------------------------------------|----|
|    |                                                                                                |                                                                                                |                                                                                                    |    |
| 11 | <b>1a</b>                                                                                      | 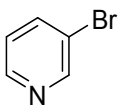<br><b>2k</b> | 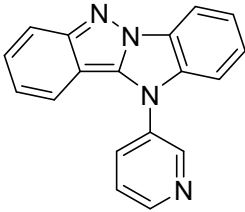<br><b>3ak</b>  | 68 |
| 12 | <b>1a</b>                                                                                      | $\text{H}_3\text{C}-\text{I}$<br><b>2l</b>                                                     | 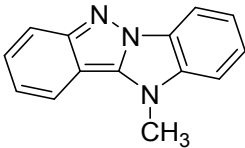<br><b>3al</b>  | 65 |
| 13 | 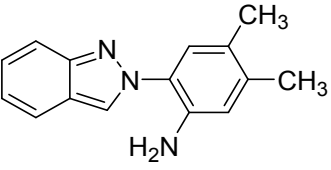<br><b>1b</b> | <b>2a</b>                                                                                      | 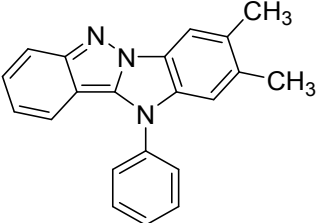<br><b>3ba</b>   | 71 |
| 14 | <b>1b</b>                                                                                      | <b>2c</b>                                                                                      | 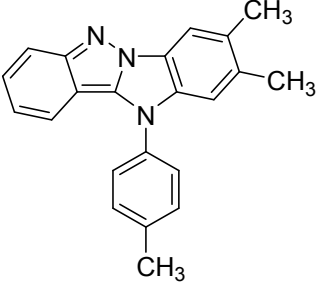<br><b>3bc</b> | 70 |
| 15 | <b>1b</b>                                                                                      | <b>2d</b>                                                                                      | 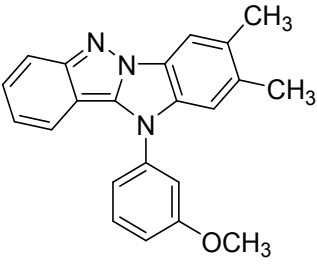<br><b>3bd</b> | 69 |

|    |    |    |                                                                                                        |    |
|----|----|----|--------------------------------------------------------------------------------------------------------|----|
| 16 | 1b | 2e | 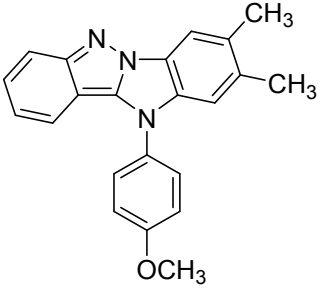 <p><b>3be</b></p>   | 70 |
| 17 | 1b | 2g | 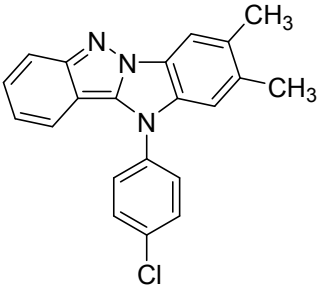 <p><b>3bg</b></p>   | 70 |
| 18 | 1b | 2j | 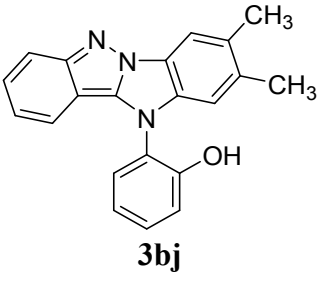 <p><b>3bj</b></p>  | 66 |
| 19 | 1b | 2l | 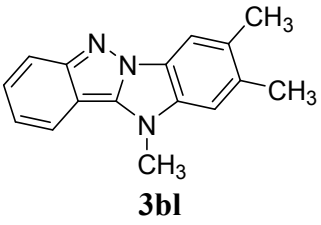 <p><b>3bl</b></p> | 65 |

|    |                                                                                                    |           |                                                                                                       |    |
|----|----------------------------------------------------------------------------------------------------|-----------|-------------------------------------------------------------------------------------------------------|----|
| 20 | 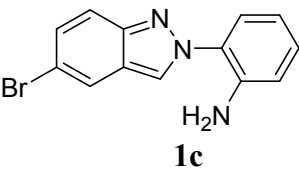 <p><b>1c</b></p> | <b>2a</b> | 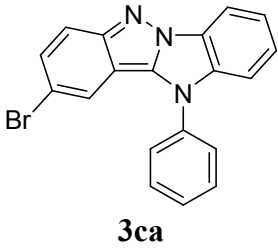 <p><b>3ca</b></p> | 70 |
|----|----------------------------------------------------------------------------------------------------|-----------|-------------------------------------------------------------------------------------------------------|----|

<sup>a</sup>All the reactions were carried out using compound **1** (0.47 mmol), **2** (0.71 mmol) and Cu(OAc)<sub>2</sub>.H<sub>2</sub>O (20 mol%), X-Phos (5 mol%) in DMF (3 mL) at 100 °C for 8 h in seal tube.

<sup>b</sup>Isolated yield.

## Chemistry

**General methods:** Unless stated otherwise, solvents and chemicals were obtained from commercial sources and were used without further purification. Reactions were monitored by thin layer chromatography (TLC) on silica gel plates (60 F254), visualizing with ultraviolet light or iodine spray. Flash chromatography was performed on silica gel (100-200 mesh) using hexane and ethyl acetate. <sup>1</sup>H and <sup>13</sup>C NMR spectra were determined in CDCl<sub>3</sub> and DMSO-*d*<sub>6</sub> solutions by using 400 or 100 MHz spectrometers, respectively. Proton chemical shifts (δ) are relative to tetramethylsilane (TMS, δ = 0.00) as internal standard and expressed in ppm. Spin multiplicities are given as s (singlet), d (doublet), t (triplet) and m (multiplet) as well as b (broad). Coupling constants (*J*) are given in hertz. Melting points were determined using a melting point apparatus and are uncorrected. MS spectra were obtained on a mass spectrometer. HRMS data were recorded by electrospray ionization with a Q-TOF mass analyzer. 2-azidobenzaldehyde<sup>1</sup>, 2-azido-5-bromobenzaldehyde<sup>1</sup> was prepared according to the known procedure.

### General procedure for the synthesis of indazol-2-ylanilines (**1**)<sup>2</sup>:

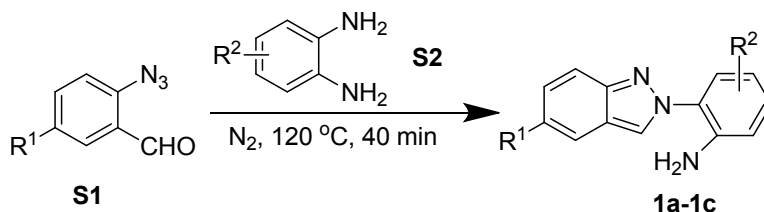

2-Azidobenzaldehyde (**S1**) (3.39 mmol), *o*-phenylenediamine (**S2**) (3.39 mmol) were taken in a oven dried schlenck tube and it was closed with nitrogen balloon and stirred for 40 min at 120 °C. After completion of the reaction was monitored by TLC. The reaction mixture was cool to

room temperature, diluted with DCM and was purified using column chromatography over silica gel with EtOAc / hexane to give desired product of **1a-c**.

**2-(2*H*-Indazol-2-yl)aniline (1a):**

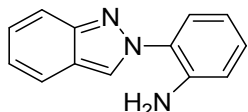

Off white solid; Yield: 65 %; mp: 78-80 °C (76-78 °C lit<sup>3</sup>); <sup>1</sup>H NMR (400 MHz, CDCl<sub>3</sub>): δ 8.22 (s, 1H), 7.75 (t, *J* = 7.8 Hz, 2H), 7.34 (t, *J* = 7.8 Hz, 2H), 7.25-7.21 (m, 1H), 7.13 (t, *J* = 7.6 Hz, 1H), 6.88 (d, *J* = 8.0 Hz, 1H), 6.84 (t, *J* = 7.6 Hz, 1H), 4.86 (s, 2H).

**2-(2*H*-Indazol-2-yl)-4,5-dimethylaniline (1b):**

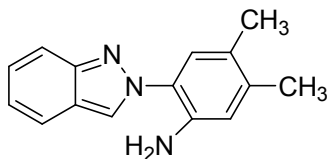

Off white solid; Yield: 55%; mp: 147-151 °C; <sup>1</sup>H NMR (400 MHz, CDCl<sub>3</sub>): δ 8.19 (d, *J* = 0.8 Hz, 1H), 7.76-7.71 (m, 2H), 7.34-7.30 (m, 1H), 7.14-7.10 (m, 2H), 6.69 (s, 1H), 4.62 (s, 2H), 2.24 (s, 3H), 2.22 (s, 3H); <sup>13</sup>C NMR (100 MHz, CDCl<sub>3</sub>): δ 149.4, 138.9, 138.1, 126.4 (2C), 125.7, 124.5, 123.5, 122.0, 121.8, 120.3, 118.8, 117.5, 19.6, 18.7; HR-MS(ESI+) *m/z* calculated for [C<sub>15</sub>H<sub>16</sub>N<sub>3</sub>]<sup>+</sup> = [*M* + *H*]<sup>+</sup> 238.1344, found 238.1343.

**2-(5-Bromo-2*H*-indazol-2-yl)aniline(1c):**

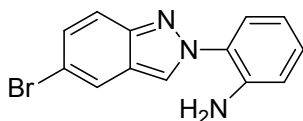

Brown solid; Yield: 75%; mp: 86-88 °C (88-90 °C lit<sup>3</sup>); <sup>1</sup>H NMR (400 MHz, CDCl<sub>3</sub>): δ 8.16 (d, *J* = 0.4 Hz, 1H), 7.89 (d, *J* = 1.2 Hz, 1H), 7.63 (d, *J* = 8.8 Hz, 1H), 7.39 (dd, *J* = 9.2 & 8.0 Hz, 1H), 7.31 (dd, *J* = 8.0 & 7.5 Hz, 1H), 7.25-7.21 (m, 1H), 6.89-6.81 (m, 2H), 4.87 (s, 2H).

**Procedure for the synthesis of 2-(2*H*-indazol-2-yl)-*N*-methylaniline (IA)**

To a mixture of NaH (1.25 equiv) and indazol-2-ylanilines (1 equiv) in DMF was added MeI (1.10 equiv) dropwise at 0 °C and stirred at 0 °C for 12 h under nitrogen atmosphere. After completion of the reaction (confirmed by TLC), the mixture was diluted with ice water and extracted with ethyl acetate (20 mL × 3). The organic layers were collected, combined, dried over anhydrous Na<sub>2</sub>SO<sub>4</sub>, filtered and concentrated under low vacuum. The residue was purified

by column chromatography using hexane-ethyl acetate as an eluent to afford the title compound.

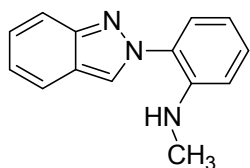

Gray solid; Yield: 52%; mp: 136-140 °C; <sup>1</sup>H NMR (400 MHz, CDCl<sub>3</sub>): δ 8.17 (s, 1H), 7.74 (dd, *J* = 10.0 & 8.8 Hz, 2H), 7.35-7.28 (m, 3H), 7.12 (t, *J* = 7.6 Hz, 1H), 6.81 (d, *J* = 8.4 Hz, 1H), 6.76 (t, *J* = 7.6 Hz, 1H), 6.00 (s, 1H), 2.85 (d, *J* = 4.8 Hz, 3H); <sup>13</sup>C NMR (100 MHz, CDCl<sub>3</sub>): δ 149.5, 143.6, 129.9, 126.7, 126.2, 124.8, 124.0, 122.2, 121.8, 120.4, 117.5, 115.9, 111.6, 30.0; HR-MS(ESI+) *m/z* calculated for [C<sub>14</sub>H<sub>14</sub>N<sub>3</sub>]<sup>+</sup> = [M + H]<sup>+</sup> 224.1187, found 224.1187.

### General procedure for the synthesis of imidazo[1,2-*b*]indazoles (3):

To an oven-dried seal tube was added 2-(2*H*-indazol-2-yl)aniline (**1**) (0.478 mmol), aryl/heteroaryl/aliphatic halide (**2**) (0.717 mmol), Cu(OAc)<sub>2</sub>·H<sub>2</sub>O (20 mol %) and X-Phos (5 mol %) were also added to the seal tube, then DMF (3 mL) was added. The mixture was stirred at 100 °C for 8 h in an oil bath. After completion of the reaction, the mixture was cooled to room temperature, diluted with water (10 mL) and extracted with ethyl acetate (2×15 mL). The organic layers were collected, combined and washed by saturated sodium bicarbonate, brine and dried with Na<sub>2</sub>SO<sub>4</sub> and concentrated under vacuum. The residue obtained was purified by column chromatography using ethyl acetate/hexane to give the desired product.

### 11-Phenyl-11*H*-benzo[4,5]imidazo[1,2-*b*]indazole (3aa):

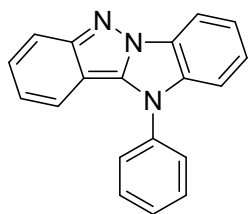

Gray solid; Yield: 72%; mp: 172-174 °C; <sup>1</sup>H NMR (400 MHz, CDCl<sub>3</sub>): δ 8.21-8.18 (m, 1H), 7.77 (d, *J* = 8.4 Hz, 3H), 7.70-7.63 (m, 3H), 7.56-7.52 (m, 2H), 7.47-7.44 (m, 2H), 7.38 (t, *J* = 7.6 Hz, 1H), 6.94 (t, *J* = 7.4 Hz, 1H); <sup>13</sup>C NMR (100 MHz, CDCl<sub>3</sub>): δ 153.6, 136.7, 135.8, 135.0, 130.2 (2C), 128.1, 127.1, 126.1, 124.9, 124.7 (2C), 122.3, 119.2, 118.1, 116.6, 112.3, 110.9, 102.9; HR-MS(ESI+) *m/z* calculated for [C<sub>19</sub>H<sub>14</sub>N<sub>3</sub>]<sup>+</sup> = [M + H]<sup>+</sup> 284.1187, found 284.1210.

### 11-(*o*-Tolyl)-11*H*-benzo[4,5]imidazo[1,2-*b*]indazole (3ab):

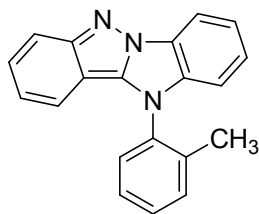

Gray solid; Yield: 68%; mp: 152-154 °C;  $^1\text{H}$  NMR (400 MHz,  $\text{CDCl}_3$ ):  $\delta$  8.20 (t,  $J$  = 8.8 Hz, 1H), 7.75 (d,  $J$  = 8.8 Hz, 1H), 7.52 (t,  $J$  = 5.2 Hz, 3H), 7.47-7.40 (m, 3H), 7.35 (t,  $J$  = 7.6 Hz, 1H), 7.25-7.18 (m, 2H), 6.86 (t,  $J$  = 7.6 Hz, 1H), 2.16 (s, 3H);  $^{13}\text{C}$  NMR (100 MHz,  $\text{CDCl}_3$ ):  $\delta$  153.6, 137.6, 136.4, 135.8, 134.1, 132.0, 129.7, 128.1, 127.6, 127.2, 125.7, 124.8, 121.9, 118.7, 118.0, 116.4, 112.3, 111.1, 103.0, 17.8; HR-MS(ESI+)  $m/z$  calculated for  $[\text{C}_{20}\text{H}_{16}\text{N}_3]^+ = [\text{M} + \text{H}]^+$  298.1344, found 298.1372.

**11-(*p*-Tolyl)-11H-benzo[4,5]imidazo[1,2-*b*]indazole (3ac):**

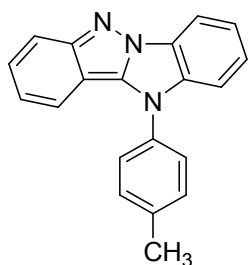

Off white solid; Yield: 70%; mp: 156-158 °C;  $^1\text{H}$  NMR (400 MHz,  $\text{CDCl}_3$ ):  $\delta$  8.19-8.17 (m, 1H), 7.75 (d,  $J$  = 9.2 Hz, 1H), 7.63-7.58 (m, 3H), 7.53 (d,  $J$  = 8.4 Hz, 1H), 7.47-7.42 (m, 4H), 7.38-7.36 (m, 1H), 6.94-6.92 (m, 1H), 2.51 (s, 3H);  $^{13}\text{C}$  NMR (100 MHz,  $\text{CDCl}_3$ ):  $\delta$  153.6, 138.3, 136.9, 135.2, 133.2, 130.8 (2C), 127.1, 126.0, 124.8, 124.7 (2C), 122.1, 119.3, 117.9, 116.5, 112.3, 110.9, 102.9, 21.2; HR-MS(ESI+)  $m/z$  calculated for  $[\text{C}_{20}\text{H}_{16}\text{N}_3]^+ = [\text{M} + \text{H}]^+$  298.1339, found 298.1338.

**11-(3-Methoxyphenyl)-11H-benzo[4,5]imidazo[1,2-*b*]indazole (3ad):**

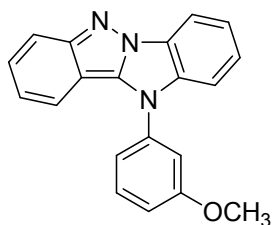

Gray solid; Yield: 72%; mp: 200-202 °C; <sup>1</sup>H NMR (400 MHz, CDCl<sub>3</sub>): δ 8.18 (t, *J* = 4.6 Hz, 1H), 7.76 (d, *J* = 9.2 Hz, 1H), 7.67 (t, *J* = 4.4 Hz, 1H), 7.61-7.55 (m, 2H), 7.44 (t, *J* = 4.4 Hz, 2H), 7.39-7.33 (m, 2H), 7.29 (s, 1H), 7.06 (d, *J* = 8.4 Hz, 1H), 6.95 (t, *J* = 7.4 Hz, 1H), 3.90 (s, 3H); <sup>13</sup>C NMR (100 MHz, CDCl<sub>3</sub>): δ 161.0, 153.7, 136.9, 136.6, 135.0, 130.9, 127.1, 126.1, 124.9, 122.3, 119.3, 118.1, 116.8, 116.6, 113.7, 112.3, 111.1, 110.4, 102.9, 55.6; HR-MS(ESI+) *m/z* calculated for [C<sub>20</sub>H<sub>16</sub>N<sub>3</sub>O]<sup>+</sup> = [M + H]<sup>+</sup> 314.1288, found 314.1286.

**11-(4-Methoxyphenyl)-11*H*-benzo[4,5]imidazo[1,2-*b*]indazole (3ae):**

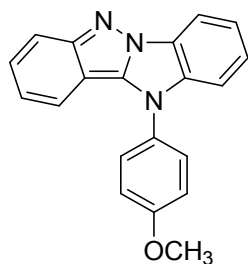

Brown solid; Yield: 70%; mp: 155-157 °C; <sup>1</sup>H NMR (400 MHz, CDCl<sub>3</sub>): δ 8.18 (t, *J* = 4.6 Hz, 1H), 7.75 (d, *J* = 8.8 Hz, 1H), 7.65 (d, *J* = 8.8 Hz, 2H), 7.55-7.37 (m, 5H), 7.18 (d, *J* = 8.8 Hz, 2H), 6.92 (t, *J* = 7.6 Hz, 1H), 3.95 (s, 3H); <sup>13</sup>C NMR (100 MHz, CDCl<sub>3</sub>): δ 159.4, 153.6, 137.2, 135.5, 128.4, 127.1, 126.5 (2C), 125.9, 124.8, 122.0, 119.1, 117.9, 116.5, 115.3 (2C), 112.2, 110.8, 102.8, 55.7; HR-MS(ESI+) *m/z* calculated for [C<sub>20</sub>H<sub>16</sub>N<sub>3</sub>O]<sup>+</sup> = [M + H]<sup>+</sup> 314.1288, found 314.1288.

**11-(3-Chlorophenyl)-11*H*-benzo[4,5]imidazo[1,2-*b*]indazole(3af):**

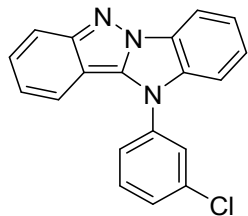

Gray solid; Yield: 70%; mp: 189-191 °C; <sup>1</sup>H NMR (400 MHz, CDCl<sub>3</sub>): δ 8.21-8.18 (m, 1H), 7.79-7.77 (m, 2H), 7.69-7.60 (m, 3H), 7.55-7.44 (m, 4H), 7.39 (t, *J* = 7.4 Hz, 1H), 6.98 (t, *J* = 7.6 Hz, 1H); <sup>13</sup>C NMR (100 MHz, CDCl<sub>3</sub>): δ 153.6, 137.0, 135.9, 134.7, 131.2, 128.2, 127.2, 126.2, 125.1, 124.8 (2C), 122.7 (2C), 118.9, 118.5, 116.8, 112.5, 110.8, 102.8; HR-MS (ESI+) *m/z* calculated for [C<sub>19</sub>H<sub>13</sub>ClN<sub>3</sub>]<sup>+</sup> = [M + H]<sup>+</sup> 318.0798, found 318.0796.

**11-(4-Chlorophenyl)-11*H*-benzo[4,5]imidazo[1,2-*b*]indazole (3ag):**

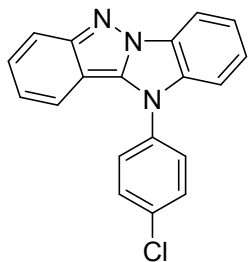

Off white solid; Yield: 68%; mp: 220-224 °C;  $^1\text{H}$  NMR (400 MHz,  $\text{CDCl}_3$ ):  $\delta$  8.20-8.18 (m, 1H), 7.77 (d,  $J$  = 8.8 Hz, 1H), 7.71 (d,  $J$  = 8.8 Hz, 2H), 7.65 (d,  $J$  = 8.4 Hz, 2H), 7.61-7.58 (m, 1H), 7.52 (d,  $J$  = 8.4 Hz, 1H), 7.47-7.45 (m, 2H), 7.38 (t,  $J$  = 7.6 Hz, 1H), 6.95 (t,  $J$  = 7.6 Hz, 1H);  $^{13}\text{C}$  NMR (100 MHz,  $\text{CDCl}_3$ ):  $\delta$  153.6, 134.9, 134.4, 133.8, 130.5 (2C), 130.2, 127.2, 126.1, 126.0 (2C), 125.0, 122.6, 118.9, 118.4, 116.8, 112.4, 110.7, 102.8; HR-MS (ESI+)  $m/z$  calculated for  $[\text{C}_{19}\text{H}_{13}\text{ClN}_3]^+ = [\text{M} + \text{H}]^+$  318.0793, found 318.0794.

**4-(11H-Benzo[4,5]imidazo[1,2-b]indazol-11-yl)benzonitrile (3ah):**

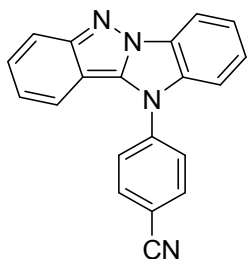

Brown solid; Yield: 70%; mp: 201-205 °C;  $^1\text{H}$  NMR (400 MHz,  $\text{CDCl}_3$ ):  $\delta$  8.20 (t,  $J$  = 4.6 Hz, 1H), 8.00 (d,  $J$  = 8.4 Hz, 2H), 7.94 (d,  $J$  = 8.4 Hz, 2H), 7.79 (d,  $J$  = 9.2 Hz, 1H), 7.67 (t,  $J$  = 4.4 Hz, 1H), 7.54-7.49 (m, 3H), 7.40 (t,  $J$  = 7.6 Hz, 1H), 7.01 (t,  $J$  = 7.6 Hz, 1H);  $^{13}\text{C}$  NMR (100 MHz,  $\text{CDCl}_3$ ):  $\delta$  153.6, 139.8, 134.3 (2C), 135.5, 134.2, 127.3, 126.5, 125.4, 124.6 (2C), 123.4, 119.0, 118.7, 117.9, 117.1, 112.7, 111.2, 110.8, 102.9; HR-MS(ESI+)  $m/z$  calculated for  $[\text{C}_{20}\text{H}_{13}\text{N}_4]^+ = [\text{M} + \text{H}]^+$  309.1135, found 309.1135.

**2-(11H-Benzo[4,5]imidazo[1,2-b]indazol-11-yl)aniline (3ai):**

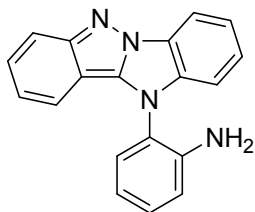

Brown solid; Yield: 65%; mp: 207-209 °C;  $^1\text{H}$  NMR (400 MHz, DMSO- $d_6$ ):  $\delta$  8.12 (d,  $J$  = 5.2 Hz, 1H), 7.60 (d,  $J$  = 7.6 Hz, 1H), 7.49-7.45(m, 2H), 7.34-7.30 (m, 5H), 7.06 (d,  $J$  = 6.4 Hz, 1H), 6.85-6.76 (m, 2H), 5.44 (s, 2H);  $^{13}\text{C}$  NMR (100 MHz, DMSO- $d_6$ ):  $\delta$  153.0, 146.0, 137.6, 135.8, 130.6, 128.5, 127.0, 125.9, 125.1, 122.0, 119.8, 119.1, 117.6, 116.8, 116.7, 116.2, 112.2, 112.1, 103.1; HR-MS(ESI+)  $m/z$  calculated for  $[\text{C}_{19}\text{H}_{15}\text{N}_4]^+ = [\text{M} + \text{H}]^+$  299.1296, found 299.1304.

**2-(11*H*-Benzo[4,5]imidazo[1,2-*b*]indazol-11-yl)phenol (3aj):**

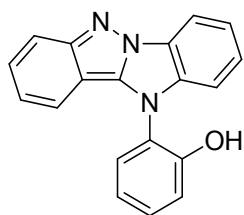

Off white solid; Yield: 65%; mp: 301-305 °C;  $^1\text{H}$  NMR (400 MHz, DMSO- $d_6$ ):  $\delta$  10.35 (s, 1H), 8.14 (d,  $J$  = 6.8 Hz, 1H), 7.66-7.63 (m, 2H), 7.49 (t,  $J$  = 7.0 Hz, 3H), 7.42 (d,  $J$  = 6.4 Hz, 1H), 7.31-7.27 (m, 3H), 7.12 (t,  $J$  = 7.6 Hz, 1H), 6.88 (t,  $J$  = 7.8 Hz, 1H);  $^{13}\text{C}$  NMR (100 MHz, DMSO- $d_6$ ):  $\delta$  153.1, 152.6, 137.1, 135.3, 130.4, 128.1, 126.7, 124.9 (2C), 121.8, 121.7, 119.9, 119.2, 117.5, 117.4, 115.9, 111.9, 111.5, 102.6; HR-MS(ESI+)  $m/z$  calculated for  $[\text{C}_{19}\text{H}_{14}\text{N}_3\text{O}]^+ = [\text{M} + \text{H}]^+$  300.1137, found 300.1140.

**11-(Pyridin-3-yl)-11*H*-benzo[4,5]imidazo[1,2-*b*]indazole (3ak):**

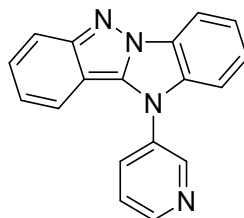

Off white solid; Yield: 68%; mp: 193-195 °C;  $^1\text{H}$  NMR (400 MHz,  $\text{CDCl}_3$ ):  $\delta$  9.13 (s, 1H), 8.81 (d,  $J$  = 1.2 Hz, 1H), 8.22 (d,  $J$  = 2.4 Hz, 1H), 8.12 (d,  $J$  = 6.0 Hz, 1H), 7.78 (d,  $J$  = 8.4 Hz, 1H), 7.66-7.62 (m, 2H), 7.53-7.46 (m, 3H), 7.39 (t,  $J$  = 6.6 Hz, 1H), 6.98 (t,  $J$  = 6.8 Hz, 1H);  $^{13}\text{C}$  NMR (100 MHz,  $\text{CDCl}_3$ ):  $\delta$  153.6, 149.1, 146.1, 136.1, 134.8, 132.9, 131.9, 127.3, 126.3, 125.2, 124.6, 123.0, 118.7, 118.6, 116.9, 112.6, 110.5, 102.7; HR-MS (ESI+)  $m/z$  calculated for  $[\text{C}_{18}\text{H}_{13}\text{N}_4]^+ = [\text{M} + \text{H}]^+$  285.1140, found 285.1146.

**11-Methyl-11*H*-benzo[4,5]imidazo[1,2-*b*]indazole (3al):**

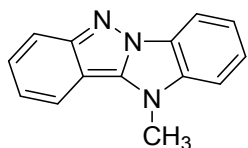

Brown solid; Yield: 65%; mp: 153-157 °C;  $^1\text{H}$  NMR (400 MHz,  $\text{CDCl}_3$ ):  $\delta$  8.11 (d,  $J$  = 8.0 Hz, 1H), 7.84 (d,  $J$  = 8.0 Hz, 1H), 7.73 (d,  $J$  = 8.8 Hz, 1H), 7.45 (s, 2H), 7.37 (t,  $J$  = 6.8 Hz, 2H), 7.00 (t,  $J$  = 7.6 Hz, 1H), 4.09 (s, 3H);  $^{13}\text{C}$  NMR (100 MHz,  $\text{CDCl}_3$ ):  $\delta$  153.3, 138.1, 135.7, 127.1, 125.4, 124.4, 121.3, 118.4, 117.9, 116.3, 112.1, 109.7, 102.8, 31.1; HR-MS(ESI+)  $m/z$  calculated for  $[\text{C}_{14}\text{H}_{12}\text{N}_3]^+ = [\text{M} + \text{H}]^+$  222.1031, found 222.1061.

**2,3-Dimethyl-11-phenyl-11H-benzo[4,5]imidazo[1,2-b]indazole (3ba):**

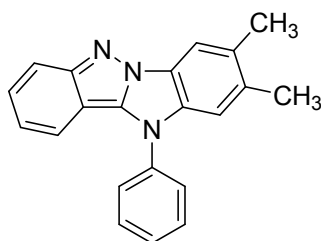

Gray solid; Yield: 71%; mp: 169-171 °C;  $^1\text{H}$  NMR (400 MHz,  $\text{CDCl}_3$ ):  $\delta$  7.96 (s, 1H), 7.75 (d,  $J$  = 8.4 Hz, 3H), 7.67 (t,  $J$  = 8.0 Hz, 2H), 7.53 (d,  $J$  = 8.0 Hz, 2H), 7.40 (s, 1H), 7.35 (t,  $J$  = 7.6 Hz, 1H), 6.92 (t,  $J$  = 7.4 Hz, 1H), 2.47 (s, 3H), 2.42 (s, 3H);  $^{13}\text{C}$  NMR (100 MHz,  $\text{CDCl}_3$ ):  $\delta$  153.4, 136.3, 136.1, 134.1, 133.4, 131.4, 130.1 (2C), 127.8, 126.8, 124.6 (2C), 124.4, 119.1, 117.8, 116.5, 112.6, 111.4, 103.1, 20.6, 20.3; HR-MS(ESI+)  $m/z$  calculated for  $[\text{C}_{21}\text{H}_{18}\text{N}_3]^+ = [\text{M} + \text{H}]^+$  312.1495, found 312.1493.

**2,3-Dimethyl-11-(*p*-tolyl)-11H-benzo[4,5]imidazo[1,2-b]indazole (3bc):**

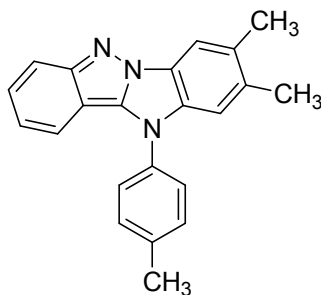

Gray solid; Yield: 70%; mp: 222-224 °C;  $^1\text{H}$  NMR (400 MHz,  $\text{CDCl}_3$ ):  $\delta$  7.93 (s, 1H), 7.73 (d,  $J$  = 8.8 Hz, 1H), 7.60 (d,  $J$  = 8.0 Hz, 2H), 7.52 (d,  $J$  = 8.4 Hz, 1H), 7.45 (d,  $J$  = 8.0 Hz, 2H), 7.34 (t,  $J$  = 7.4 Hz, 2H), 6.89 (t,  $J$  = 7.4 Hz, 1H), 2.50 (s, 3H), 2.45 (s, 3H), 2.38 (s, 3H);  $^{13}\text{C}$  NMR (100 MHz,  $\text{CDCl}_3$ ):  $\delta$  153.3, 137.9, 136.6, 134.0, 133.6, 133.5, 131.2, 130.7 (2C), 126.7, 124.6

(2C), 124.3, 119.2, 117.6, 116.4, 112.6, 111.4, 103.1, 21.2, 20.6, 20.2; HR-MS(ESI+)  $m/z$  calculated for  $[C_{22}H_{20}N_3]^+ = [M + H]^+$  326.1657, found 326.1663.

**11-(3-Methoxyphenyl)-2,3-dimethyl-11H-benzo[4,5]imidazo[1,2-b]indazole (3bd):**

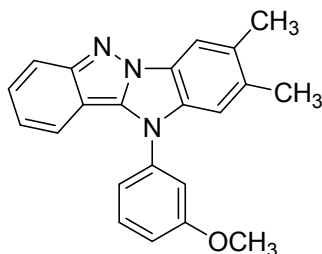

Off white solid; Yield: 69%; mp 226-228 °C;  $^1H$  NMR (400 MHz,  $CDCl_3$ ):  $\delta$  7.94 (s, 1H), 7.74 (d,  $J = 8.8$  Hz, 1H), 7.60-7.54 (m, 2H), 7.43 (s, 1H), 7.37-7.32 (m, 2H), 7.26 (d,  $J = 6.0$  Hz, 1H), 7.04 (d,  $J = 7.2$  Hz, 1H), 6.93 (t,  $J = 7.4$  Hz, 1H), 3.91 (s, 3H), 2.46 (s, 3H), 2.41 (s, 3H);  $^{13}C$  NMR (100 MHz,  $CDCl_3$ ):  $\delta$  160.9, 153.4, 137.2, 136.3, 134.1, 133.4, 131.4, 130.9, 126.7, 124.4, 119.2, 117.8, 116.7, 116.5, 113.3, 112.6, 111.6, 110.3, 103.1, 55.6, 20.6, 20.2; HR-MS(ESI+)  $m/z$  calculated for  $[C_{22}H_{20}N_3O]^+ = [M + H]^+$  342.1606, found 342.1606.

**11-(4-Methoxyphenyl)-2,3-dimethyl-11H-benzo[4,5]imidazo[1,2-b]indazole (3be):**

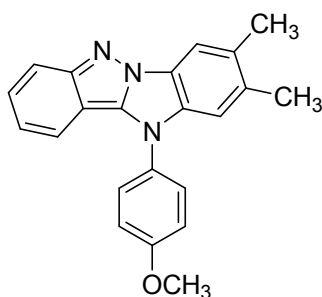

Off white solid; Yield: 70%; mp: 111-115 °C;  $^1H$  NMR (400 MHz,  $CDCl_3$ ):  $\delta$  7.93 (s, 1H), 7.73 (d,  $J = 8.8$  Hz, 1H), 7.63-7.60 (m, 2H), 7.47 (d,  $J = 8.4$  Hz, 1H), 7.36-7.31 (m, 1H), 7.28 (s, 1H), 7.17-7.14 (m, 2H), 6.91-6.87 (m, 1H), 3.93 (s, 3H), 2.45 (s, 3H), 2.39 (s, 3H);  $^{13}C$  NMR (100 MHz,  $CDCl_3$ ):  $\delta$  159.1, 153.3, 136.8, 134.0, 133.9, 131.1, 128.7, 126.7, 126.3 (2C), 124.2, 119.0, 117.6, 116.3, 115.2 (2C), 112.5, 111.2, 103.0, 55.6, 20.6, 20.2; HR-MS(ESI+)  $m/z$  calculated for  $[C_{22}H_{20}N_3O]^+ = [M + H]^+$  342.1601, found 342.1599.

**11-(4-Chlorophenyl)-2,3-dimethyl-11H-benzo[4,5]imidazo[1,2-b]indazole (3bg):**

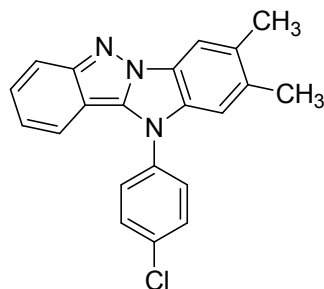

Brown solid; Yield: 70%; mp 252-254 °C;  $^1\text{H}$  NMR (400 MHz,  $\text{CDCl}_3$ ):  $\delta$  7.93 (s, 1H), 7.74 (d,  $J = 8.8$  Hz, 1H), 7.70-7.68 (m, 2H), 7.65-7.63 (m, 2H), 7.50 (d,  $J = 8.4$  Hz, 1H), 7.37-7.33 (m, 2H), 6.93 (t,  $J = 7.4$  Hz, 1H), 2.46 (s, 3H), 2.40 (s, 3H);  $^{13}\text{C}$  NMR (100 MHz,  $\text{CDCl}_3$ ):  $\delta$  153.3, 136.0, 134.7, 134.3, 133.4, 133.3, 131.7, 130.4 (2C), 126.8, 125.8 (2C), 124.5, 118.8, 118.1, 116.6, 112.7, 111.2, 102.9, 20.6, 20.2; HR-MS(ESI+)  $m/z$  calculated for  $[\text{C}_{21}\text{H}_{17}\text{ClN}_3]^+ = [\text{M} + \text{H}]^+ 346.1106$ , found 346.1107.

**2-(2,3-Dimethyl-11H-benzo[4,5]imidazo[1,2-b]indazol-11-yl)phenol (3bj):**

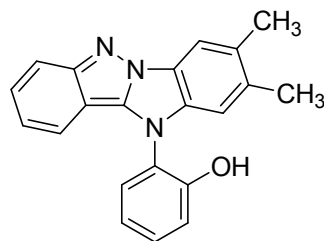

Off white solid; Yield: 66%; mp: 226-230 °C;  $^1\text{H}$  NMR (400 MHz,  $\text{DMSO}-d_6$ ):  $\delta$  10.28 (s, 1H), 7.91 (s, 1H), 7.61 (dd,  $J = 23.0$  & 6.4 Hz, 2H), 7.47 (t,  $J = 7.2$  Hz, 1H), 7.27-7.20 (m, 4H), 7.11 (t,  $J = 7.2$  Hz, 1H), 6.84 (t,  $J = 7.0$  Hz, 1H), 2.45 (s, 3H), 2.37 (s, 3H);  $^{13}\text{C}$  NMR (100 MHz,  $\text{DMSO}-d_6$ ):  $\delta$  153.0, 152.2, 136.8, 134.0, 133.8, 130.8, 130.4, 128.1, 126.6, 123.1, 121.8, 120.1, 118.9, 117.4, 117.3, 115.5, 112.0, 111.7, 102.8, 19.9, 19.6; HR-MS(ESI+)  $m/z$  calculated for  $[\text{C}_{21}\text{H}_{18}\text{N}_3\text{O}]^+ = [\text{M} + \text{H}]^+ 328.1450$ , found 328.1451.

**2,3,11-Trimethyl-11H-benzo[4,5]imidazo[1,2-b]indazole (3bl):**

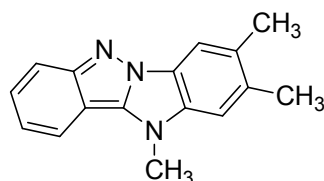

Brown solid; Yield: 65%; mp: 157-159 °C;  $^1\text{H}$  NMR (400 MHz,  $\text{CDCl}_3$ ):  $\delta$  7.86 (s, 1H), 7.81 (d,  $J = 8.4$  Hz, 1H), 7.70 (d,  $J = 8.8$  Hz, 1H), 7.35 (t,  $J = 7.6$  Hz, 1H), 7.20 (s, 1H), 6.98 (t,  $J = 7.2$  Hz, 1H), 4.03 (s, 3H), 2.44 (s, 6H);  $^{13}\text{C}$  NMR (100 MHz,  $\text{CDCl}_3$ ):  $\delta$  153.1, 137.9, 134.2, 133.7,

130.3, 126.7, 123.8, 118.3, 117.6, 116.2, 112.4, 110.2, 103.1, 31.0, 20.6, 20.2; HR-MS(ESI+)  $m/z$  calculated for  $[C_{16}H_{16}N_3]^+ = [M + H]^+ 250.1344$ , found 250.1368.

**8-Bromo-11-phenyl-11H-benzo[4,5]imidazo[1,2-b]indazole(3ca):**

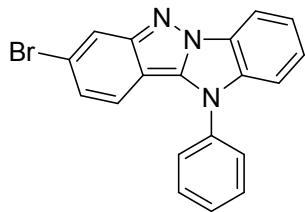

Brown solid; Yield: 70%; mp: 170-174 °C;  $^1H$  NMR (400 MHz,  $CDCl_3$ ):  $\delta$  8.17 (t,  $J = 4.2$  Hz, 1H), 7.70 (t,  $J = 7.4$  Hz, 4H), 7.65-7.62 (m, 3H), 7.59-7.54 (m, 1H), 7.49-7.42 (m, 2H), 7.41 (d,  $J = 10.4$  Hz, 1H);  $^{13}C$  NMR (100 MHz,  $CDCl_3$ ):  $\delta$  151.8, 135.8, 135.5, 135.1, 130.5, 130.4, 128.5, 128.4, 127.8, 125.8, 125.3, 124.7, 122.6, 121.2, 118.3, 112.4, 111.1, 110.5, 103.9; HR-MS(ESI+)  $m/z$  calculated for  $[C_{19}H_{13}BrN_3]^+ = [M + H]^+ 362.0293$ , found 362.0294.

**References:**

1. J. Hu, Y. Cheng, Y. Yang and Y. Rao, *Chem. Commun.*, 2011, **47**, 10133;
2. S. Vidyacharan, A. Murugan and D. S. Sharada, *J. Org. Chem.*, 2016, **81**, 2837.
3. S. Vidyacharan, A. Sagar, N. C. Chaitra, D. S. Sharada, *RSC Adv.*, 2014, **4**, 34232.

# Compound-3aa

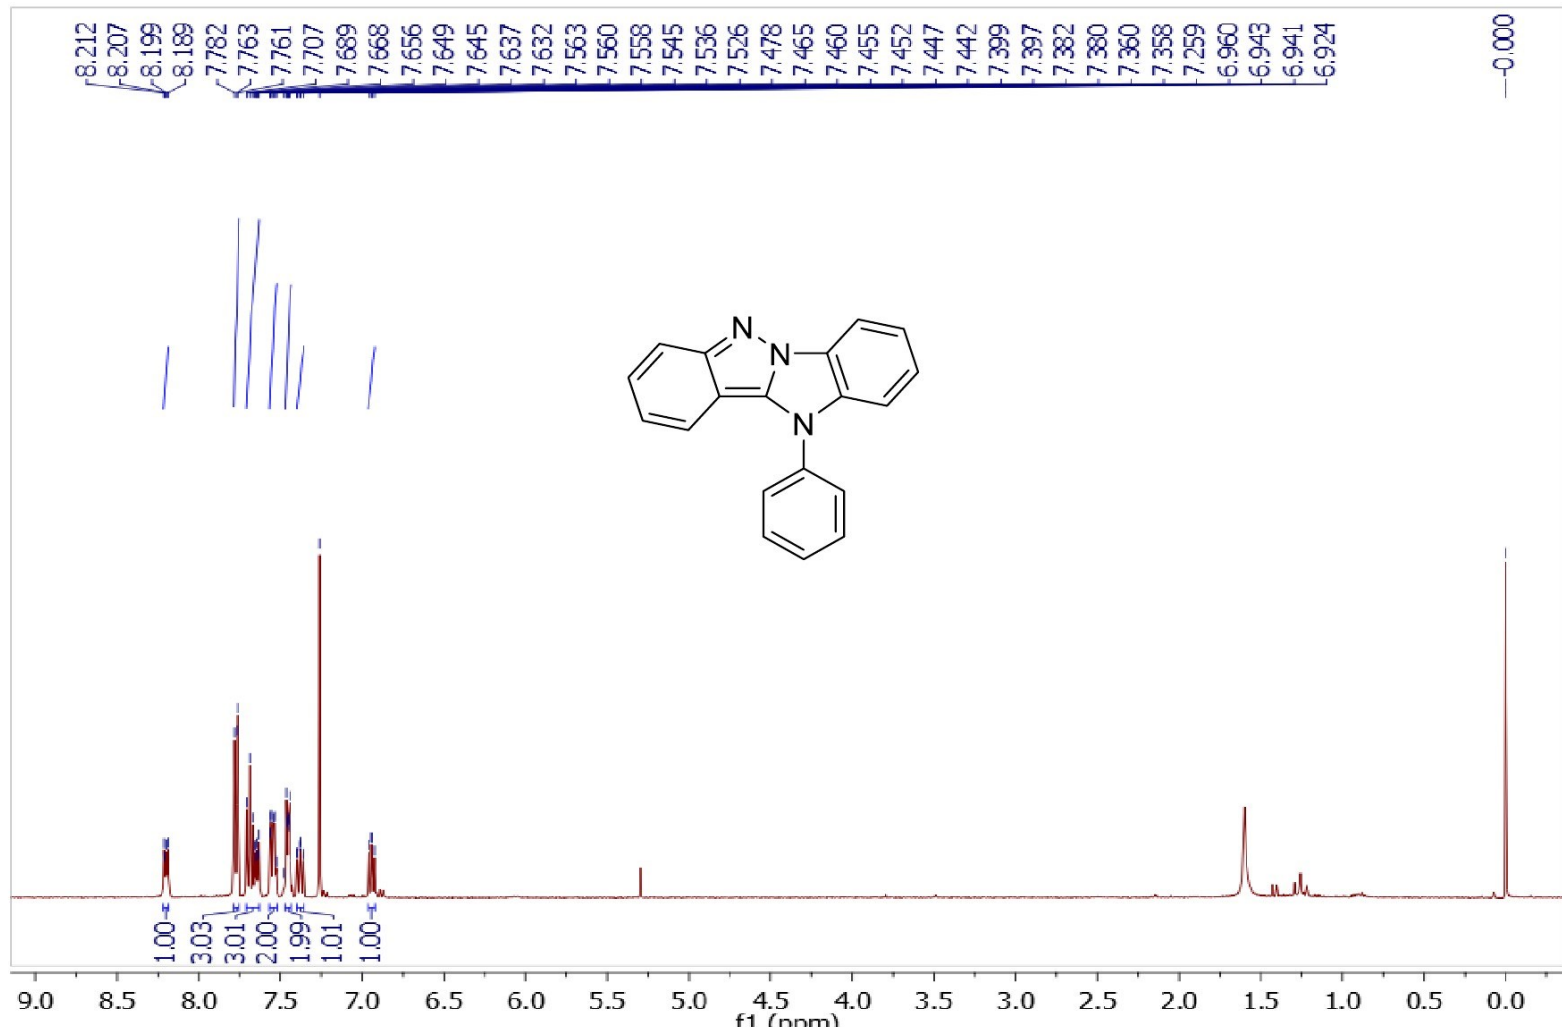

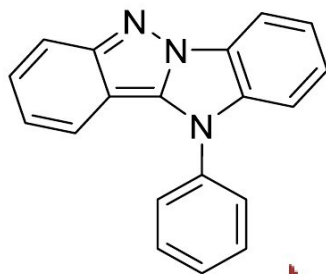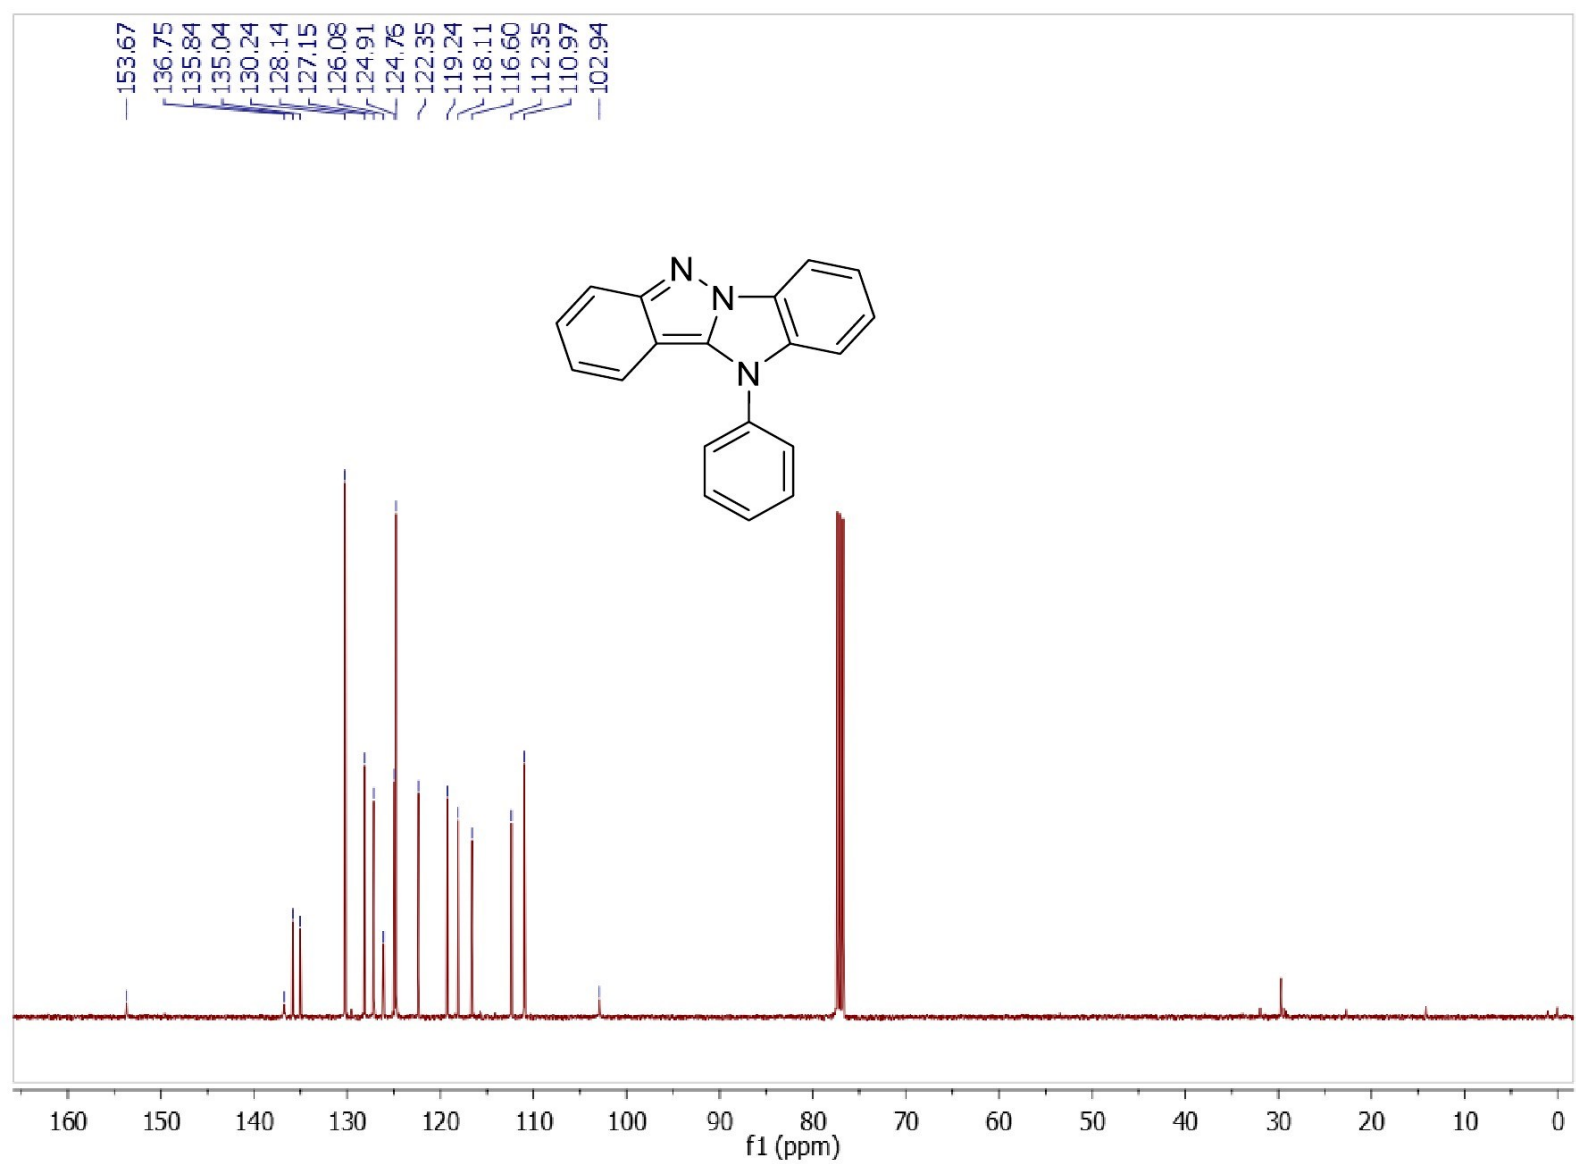

# Compound-3ab

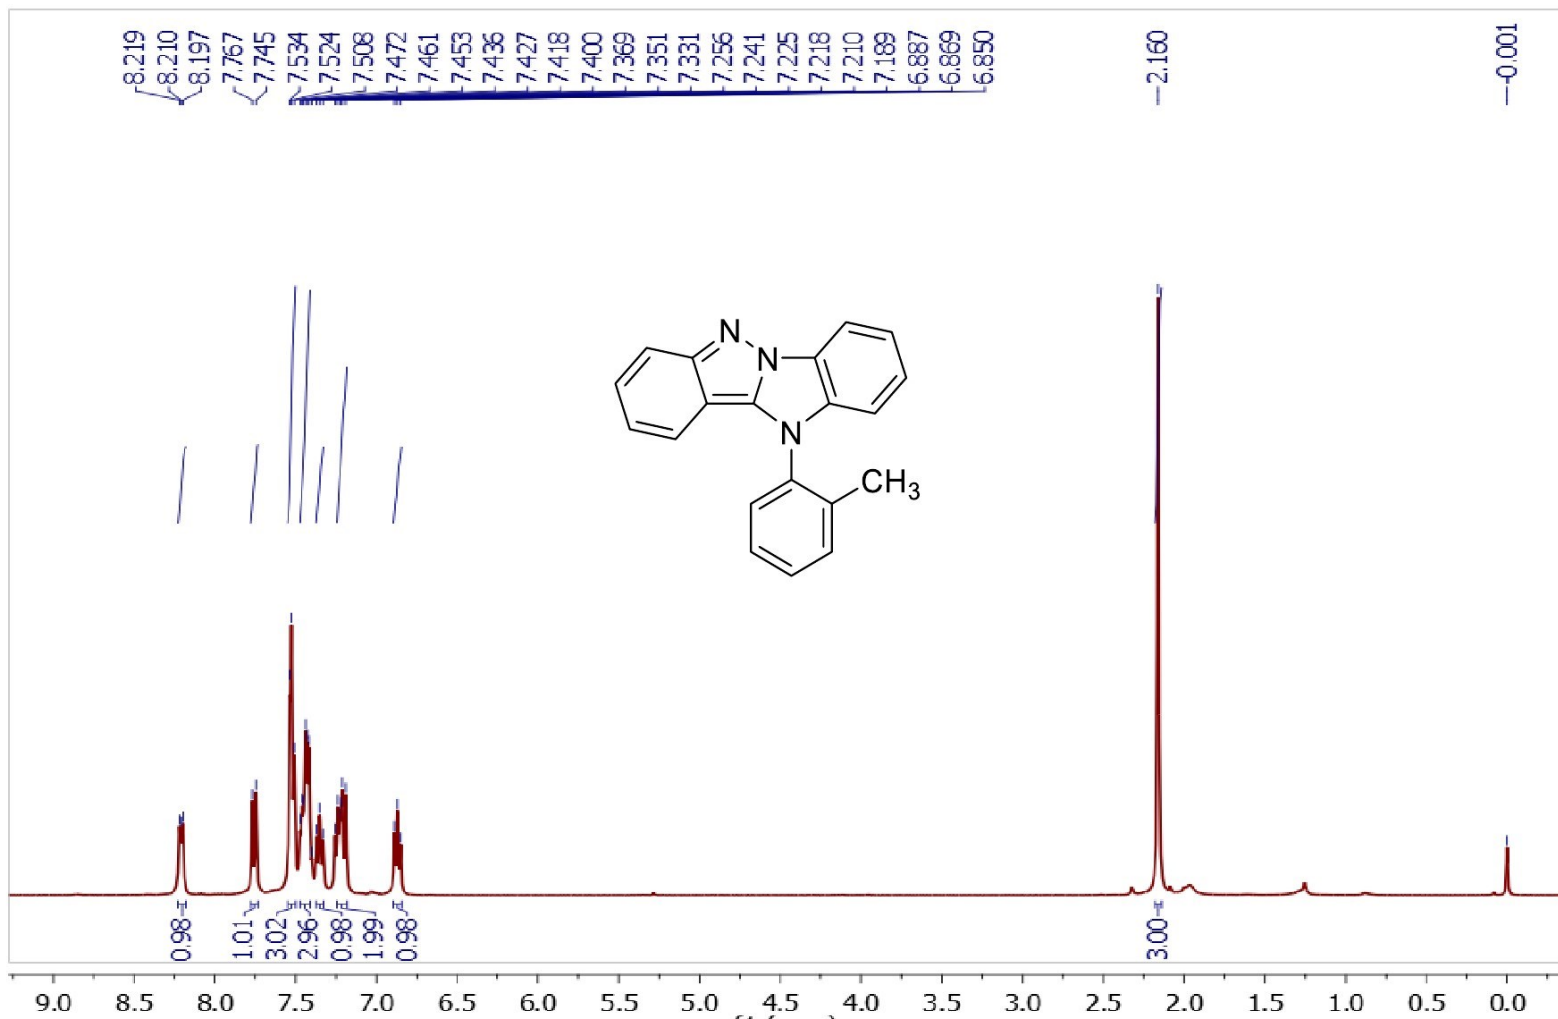

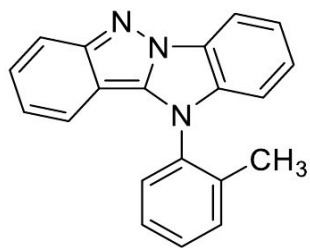

153.61  
137.60  
136.44  
135.86  
134.08  
132.02  
129.75  
128.11  
127.66  
127.18  
125.75  
124.78  
121.96  
118.71  
118.07  
116.41  
112.28  
111.08  
103.01

17.81

210 200 190 180 170 160 150 140 130 120 110 100 90 80 70 60 50 40 30 20 10 0 -10

# Compound-3ac

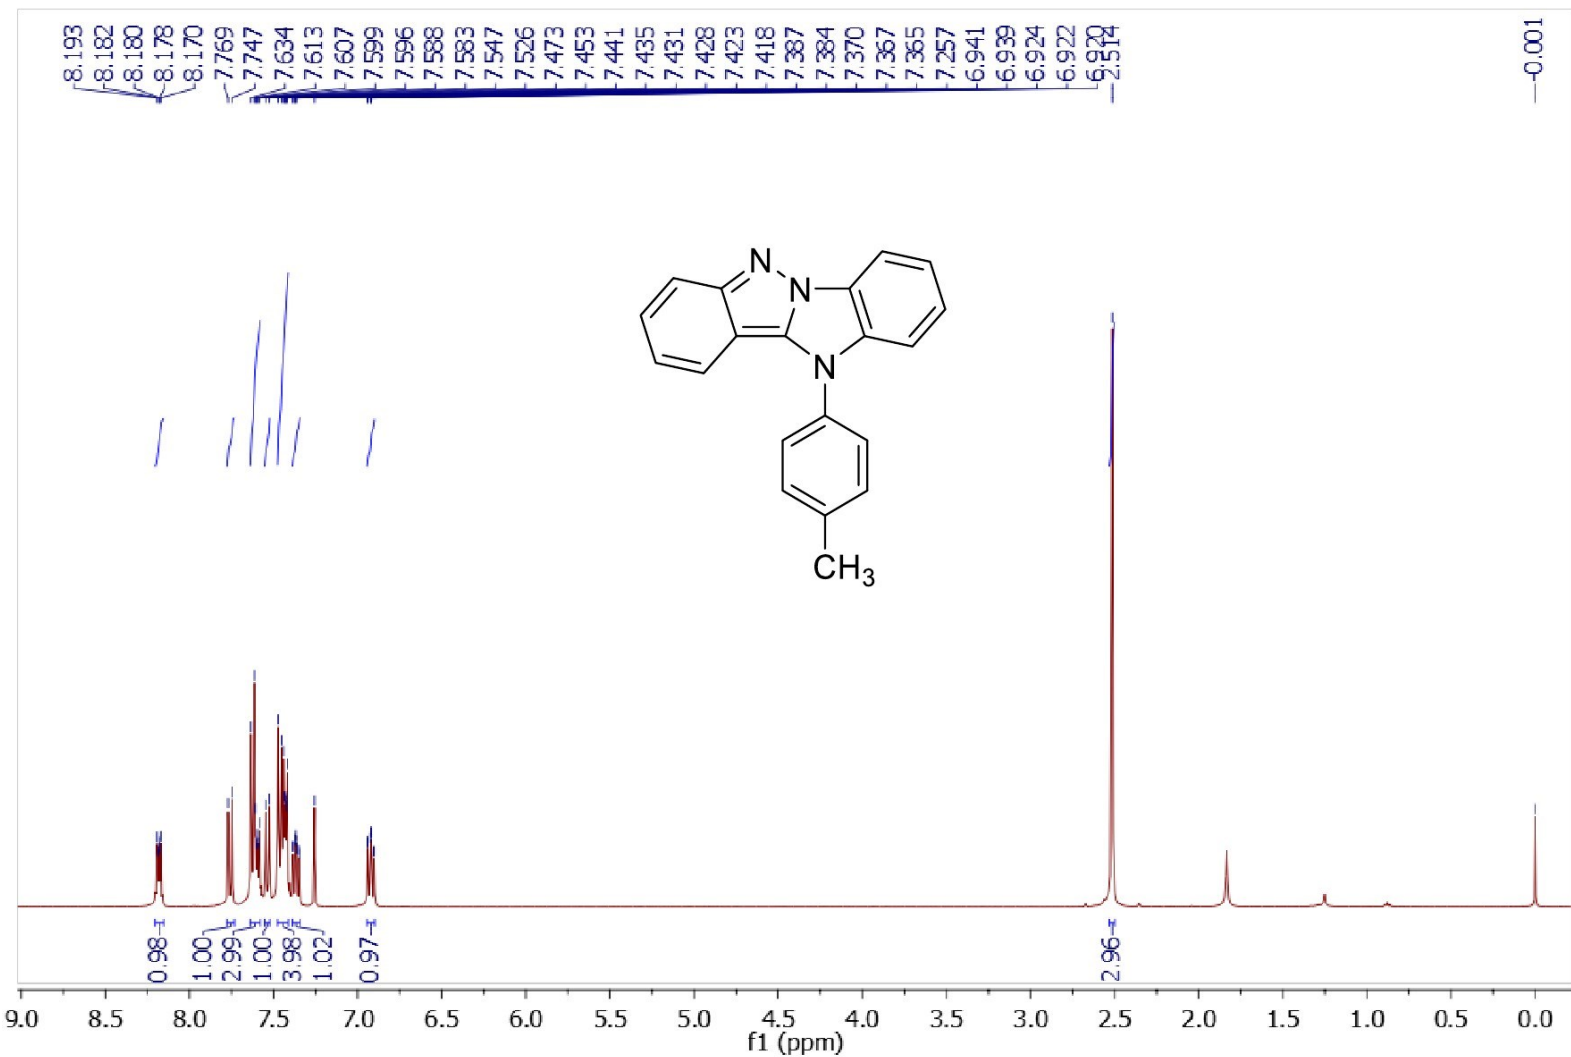

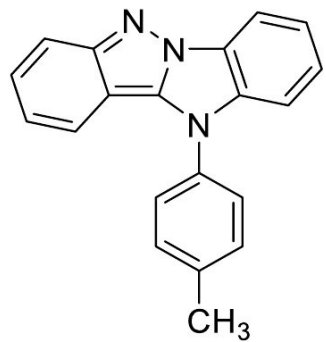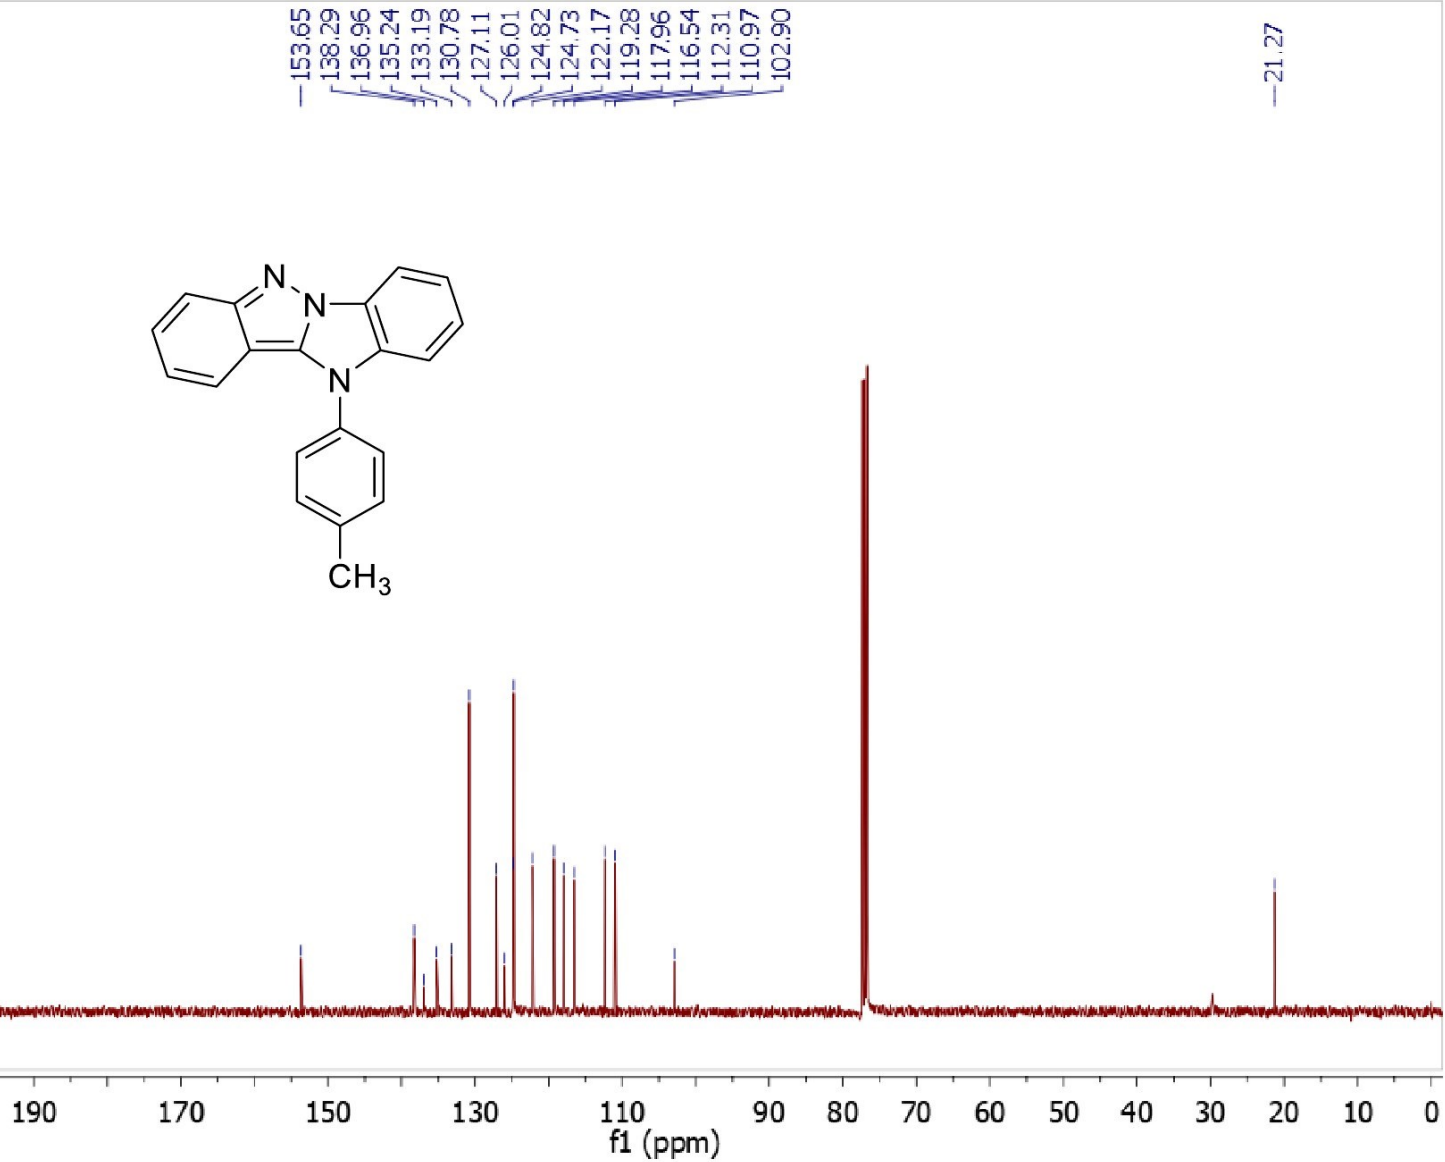

# Compound-3ad

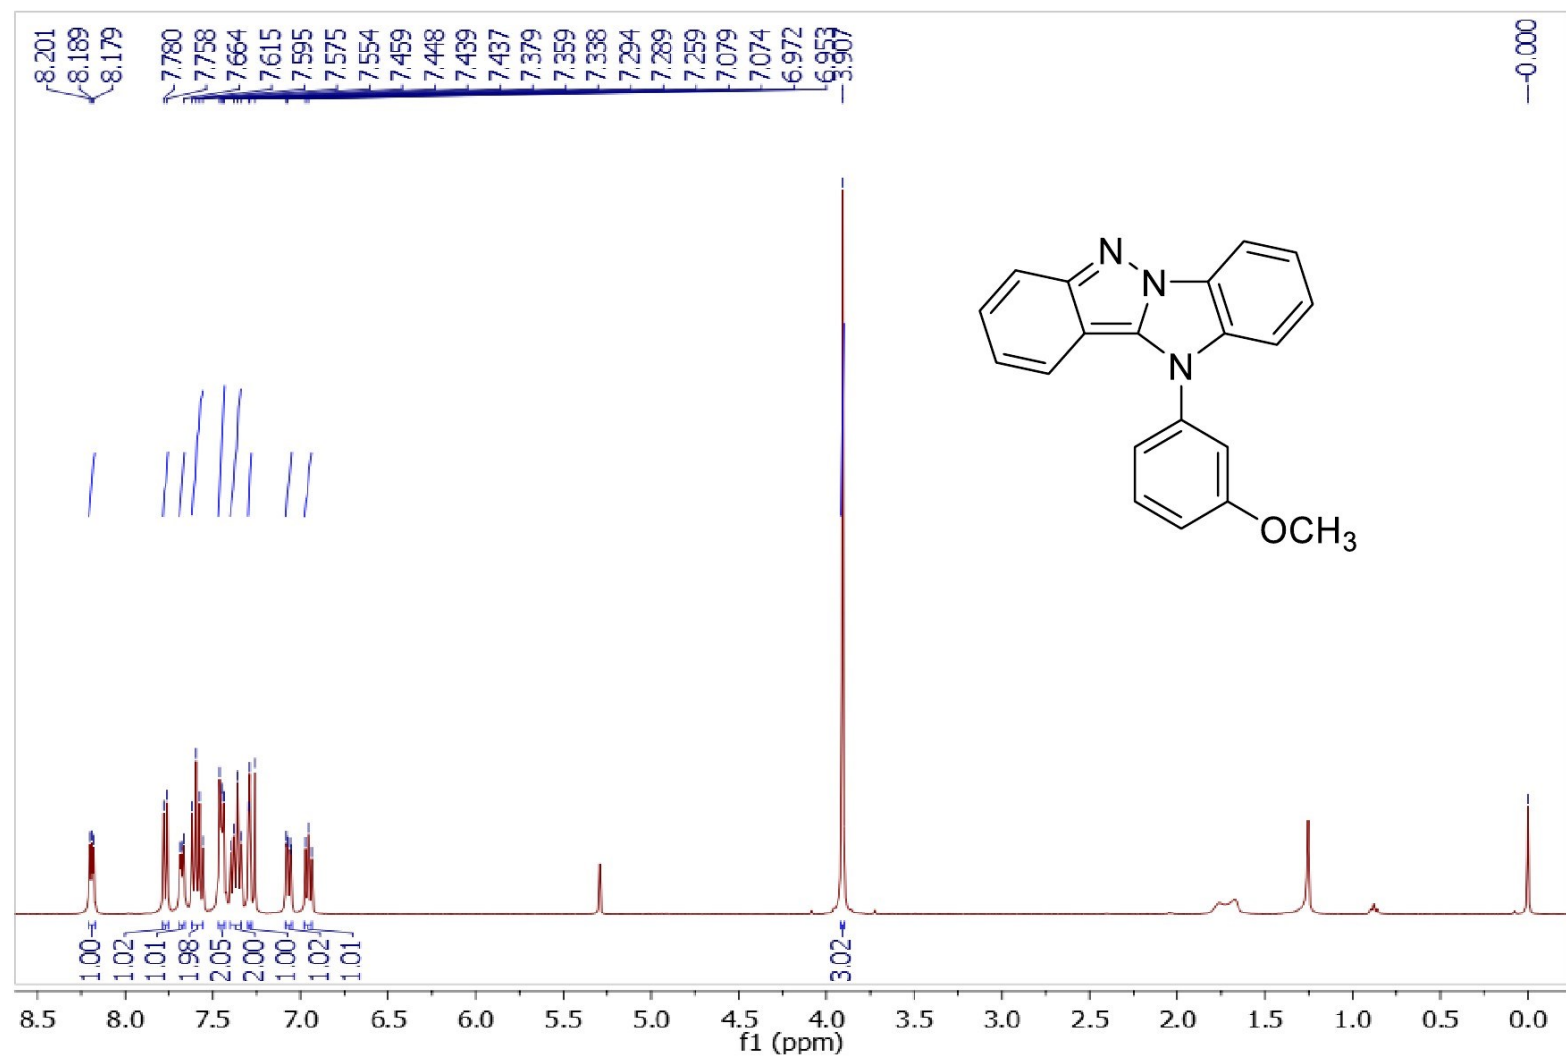

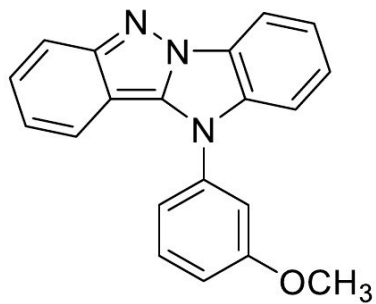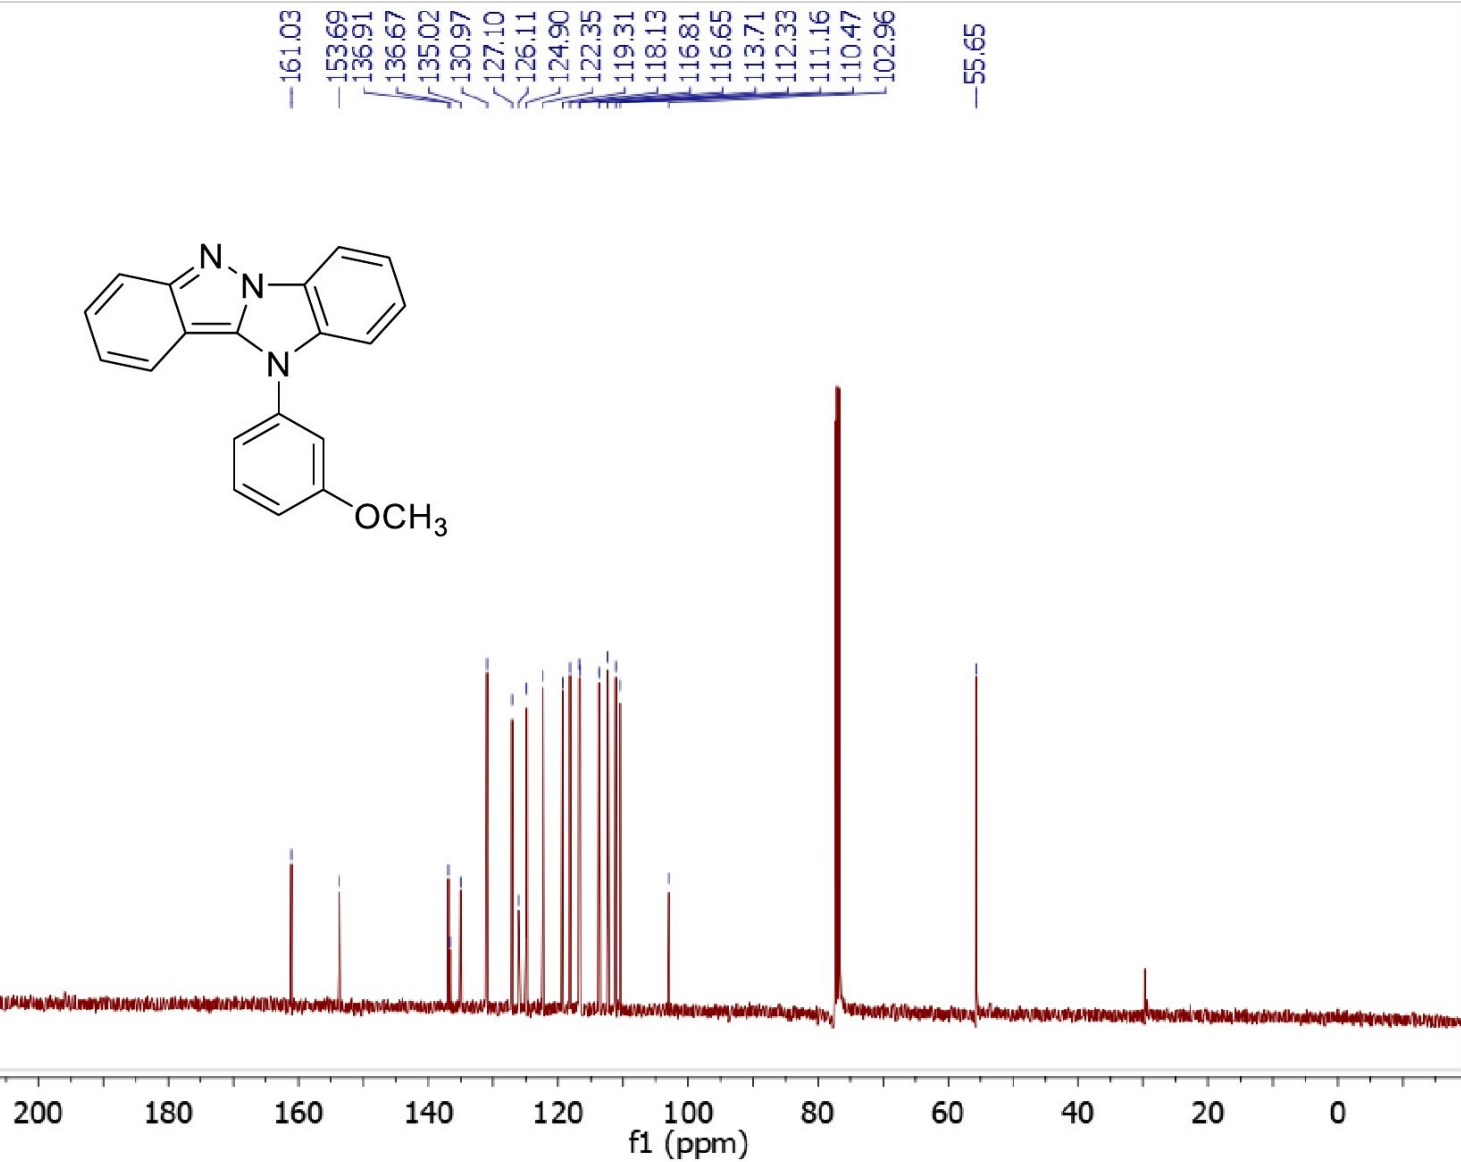

# Compound-3ae

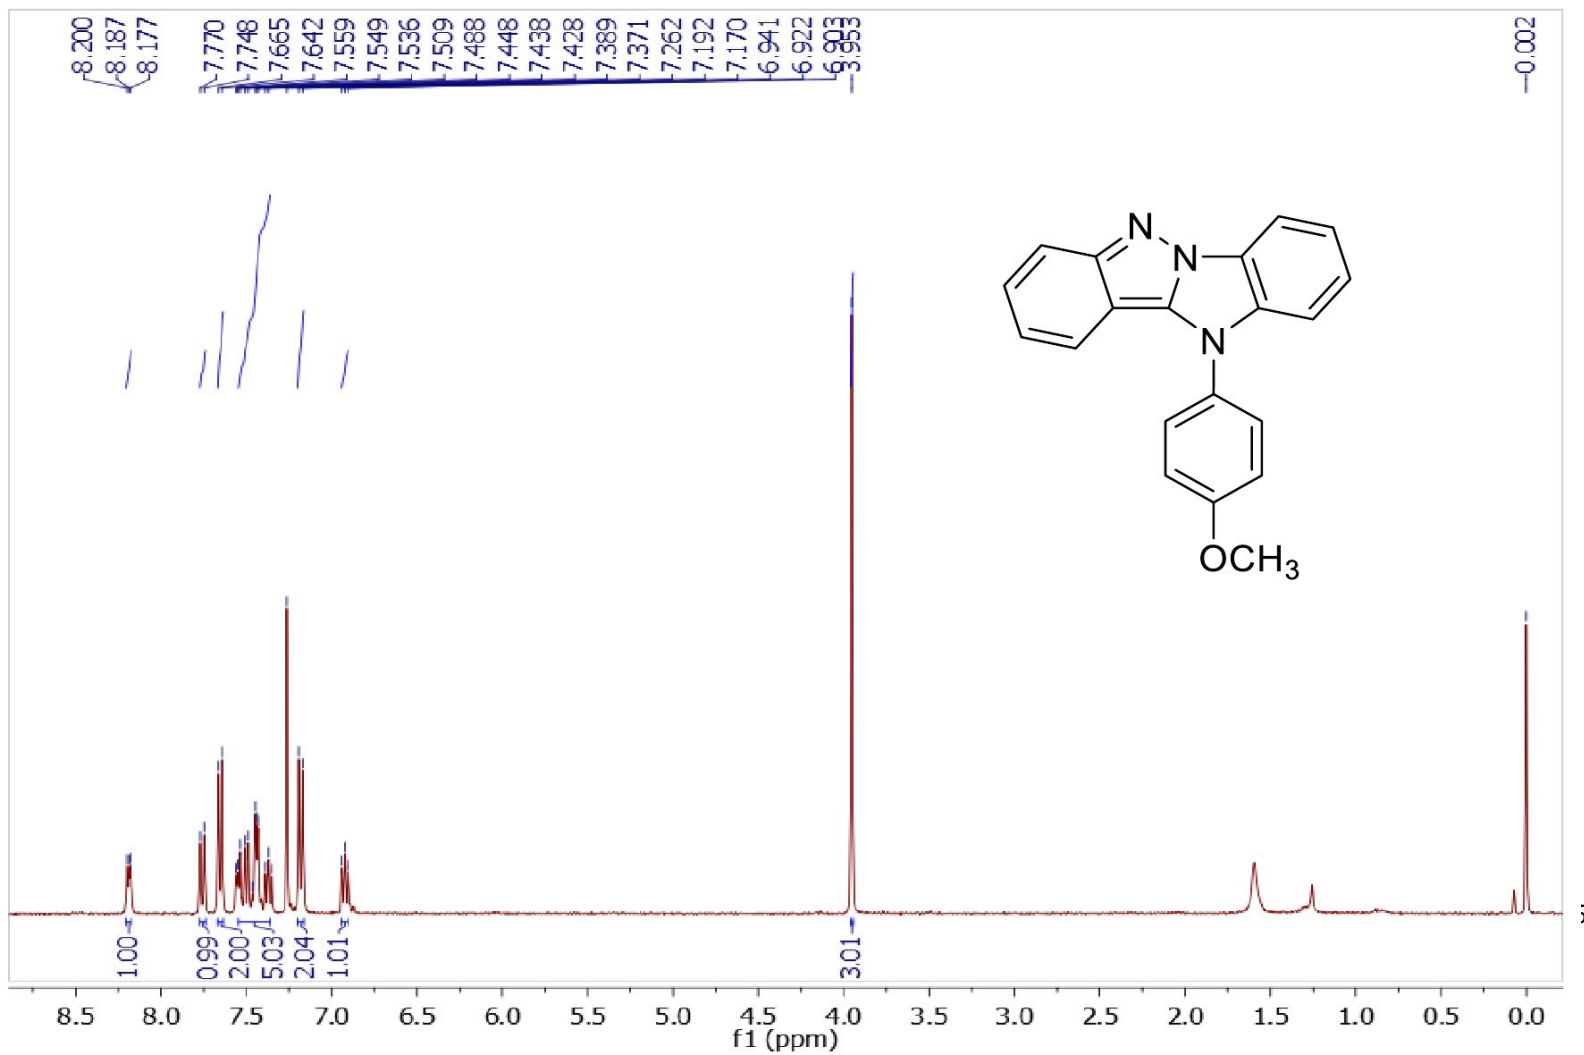

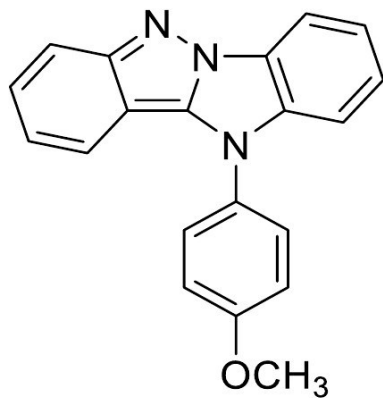

159.41  
153.64  
137.24  
135.56  
128.41  
127.11  
126.51  
125.89  
124.78  
122.07  
119.14  
117.91  
116.50  
115.36  
112.26  
110.84  
102.83  
55.70

210 200 190 180 170 160 150 140 130 120 110 100 90 80 70 60 50 40 30 20 10 0 -10

f1 (ppm)

## Compound-3af

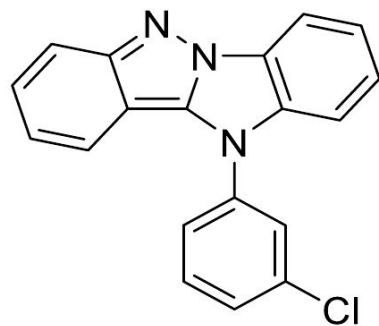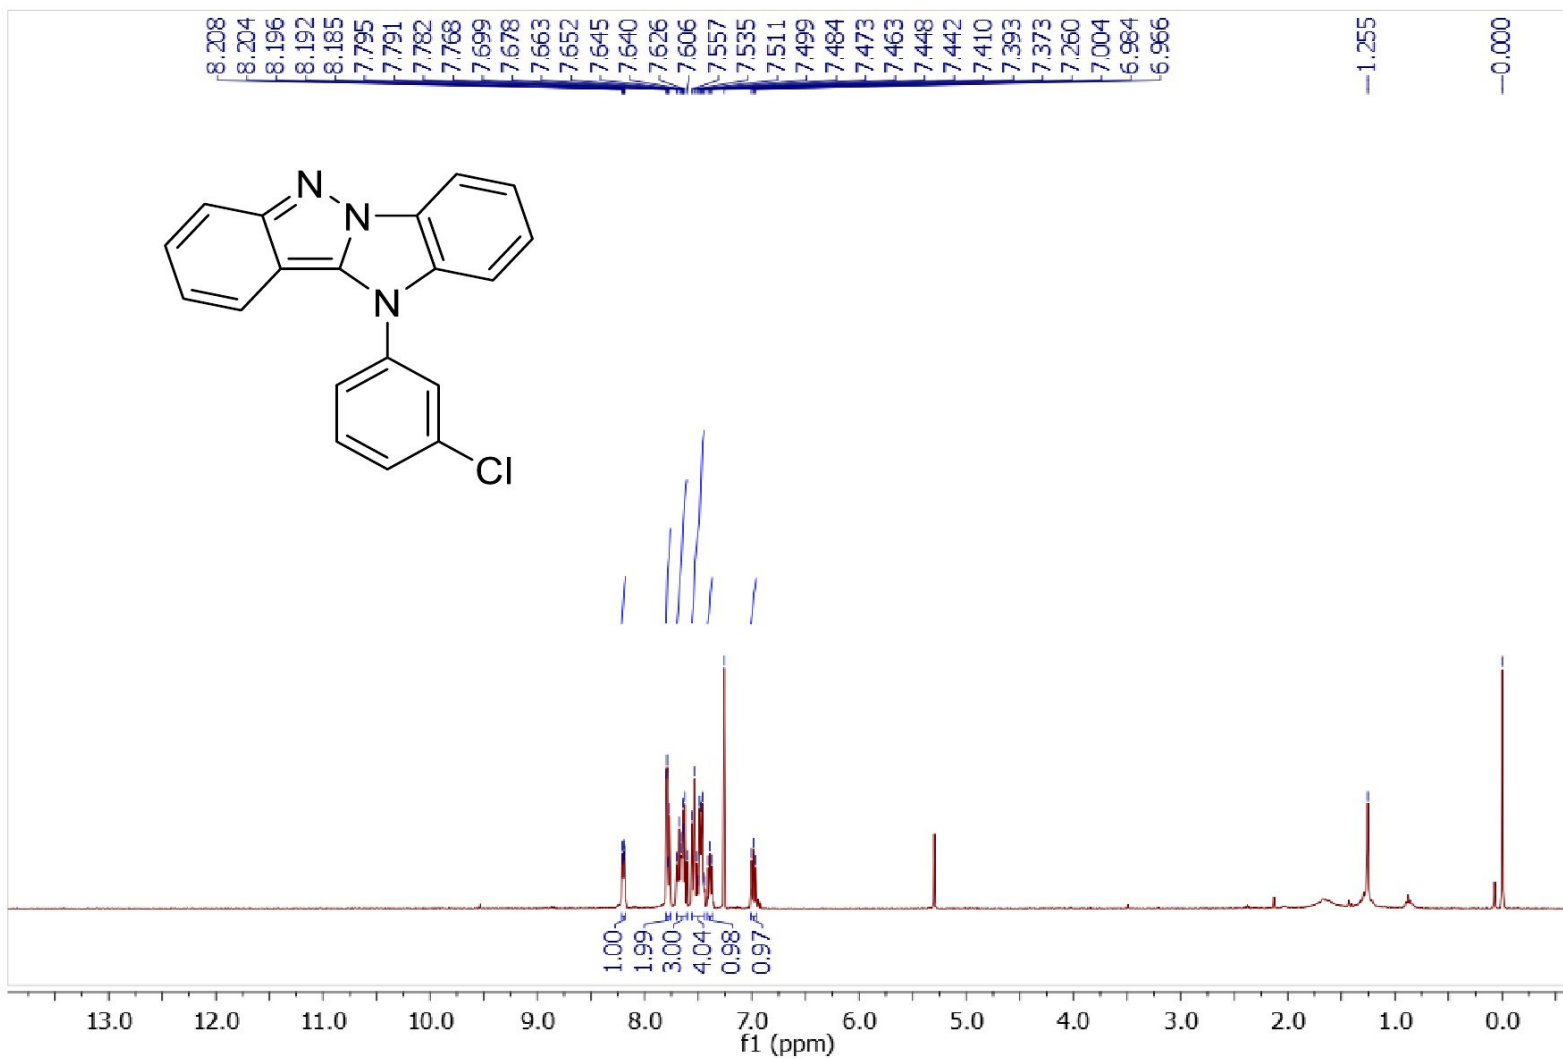

153.67  
137.06  
135.96  
134.75  
131.26  
128.23  
127.22  
126.24  
125.13  
124.85  
124.79  
122.77  
122.73  
118.97  
118.55  
116.84  
112.50  
110.87  
102.86

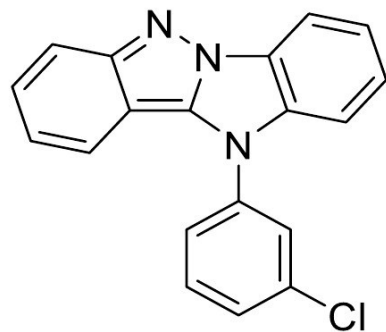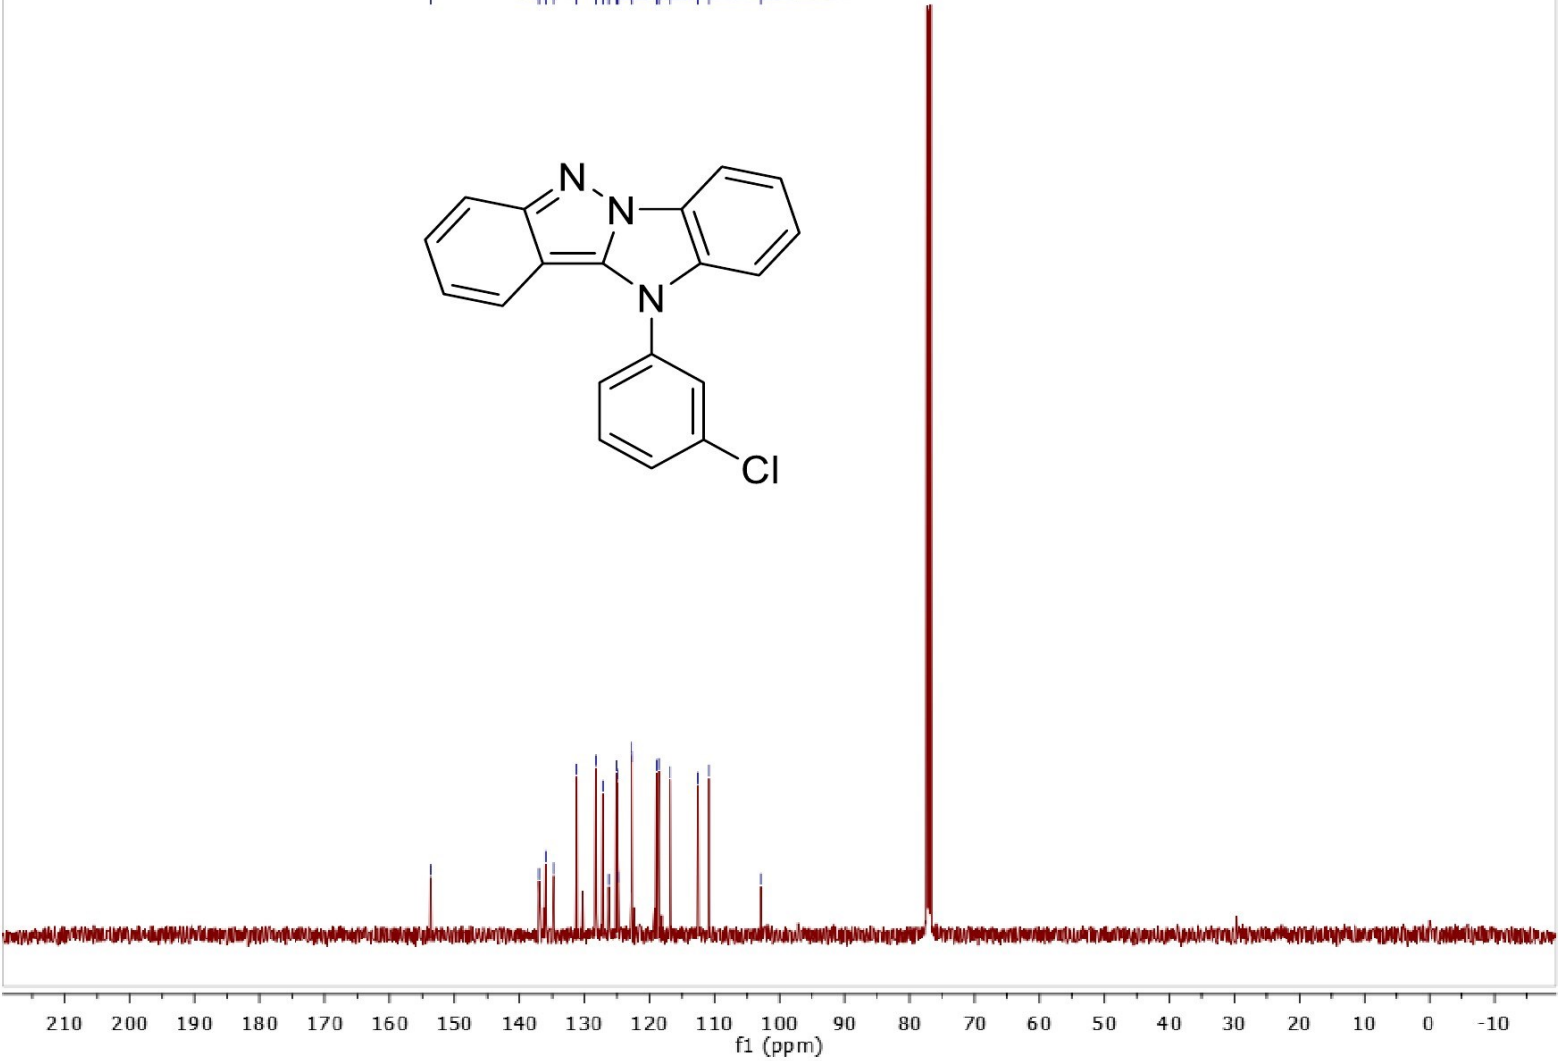

# Compound-3ag

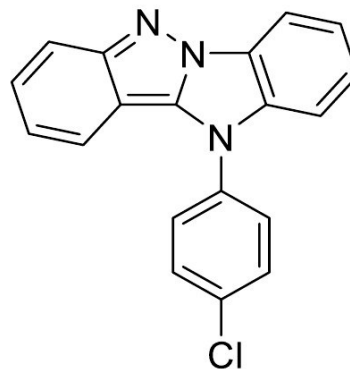

8.200  
8.194  
8.185  
8.178  
7.781  
7.759  
7.729  
7.707  
7.670  
7.649  
7.608  
7.600  
7.590  
7.585  
7.530  
7.509  
7.472  
7.465  
7.458  
7.449  
7.402  
7.384  
7.364  
7.261  
6.978  
6.959  
6.940

1.00  
1.03  
1.99  
1.98  
1.02  
1.05  
2.03  
1.05  
0.97

10.5 9.5 9.0 8.5 8.0 7.5 7.0 6.5 6.0 5.5 5.0 4.5 4.0 3.5 3.0 2.5 2.0 1.5 1.0 0.5 0.0

f1 (ppm)

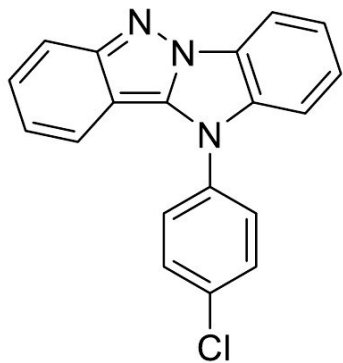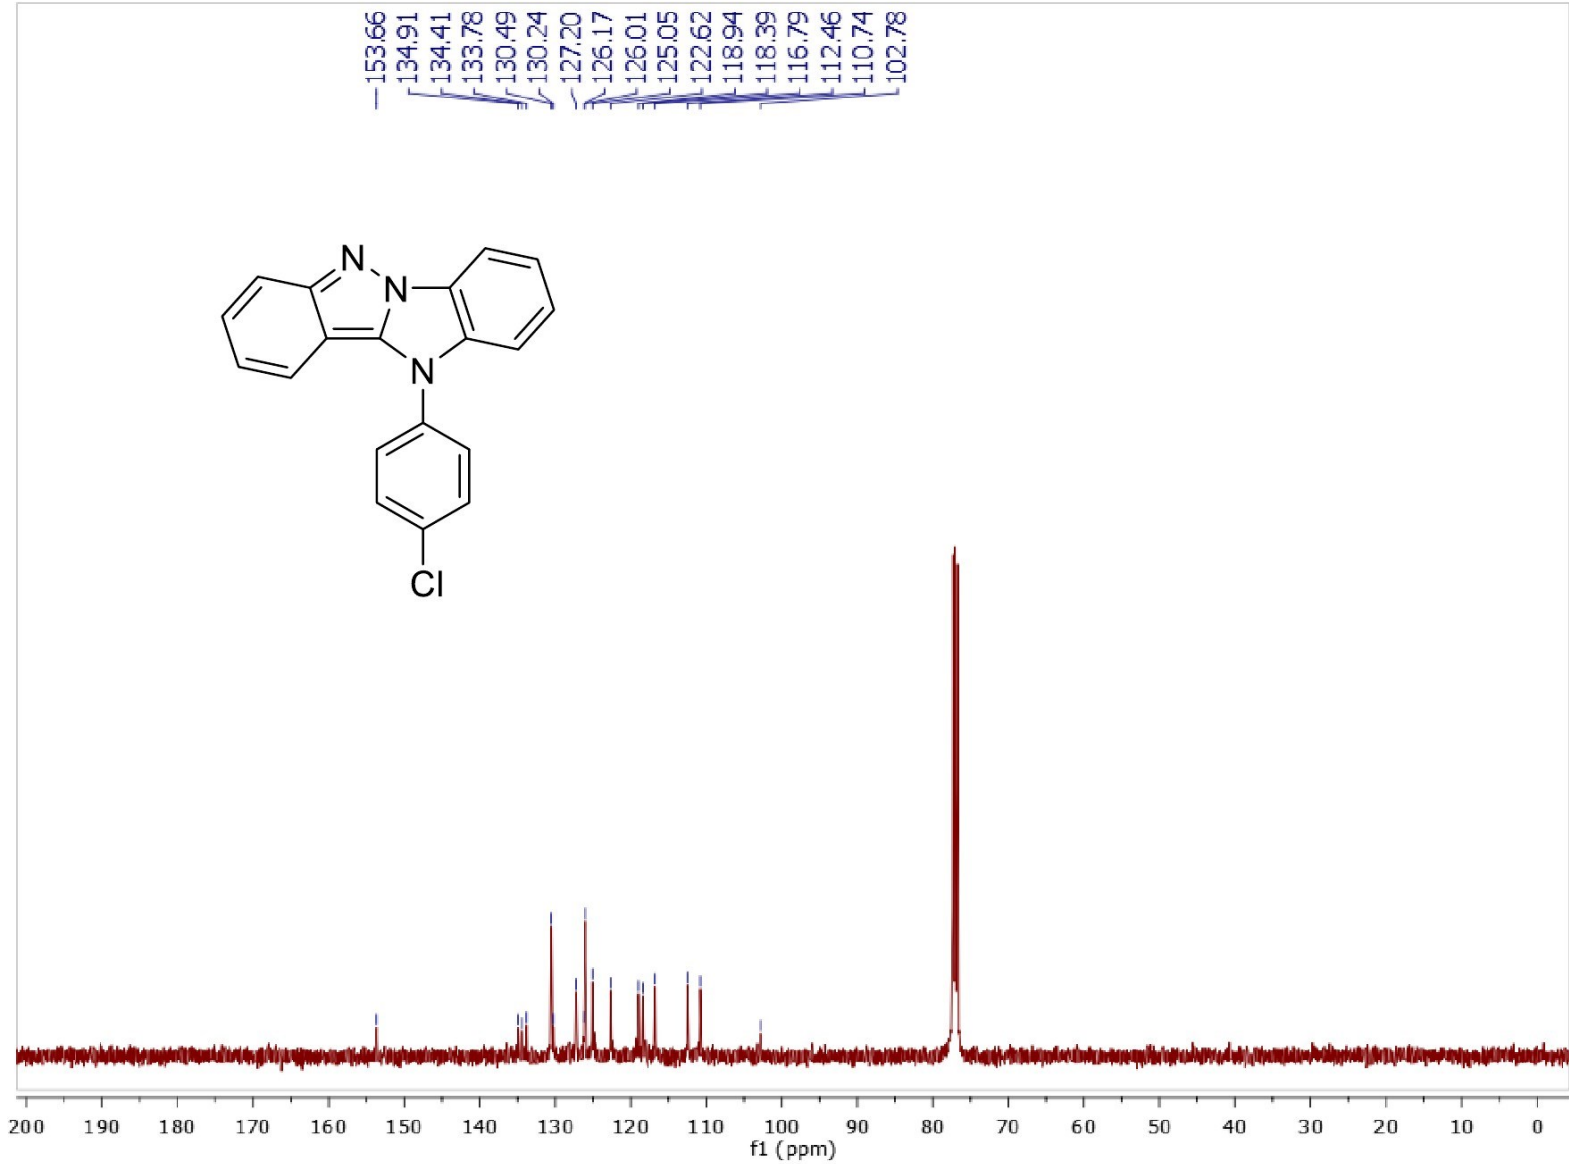

# Compound-3ah

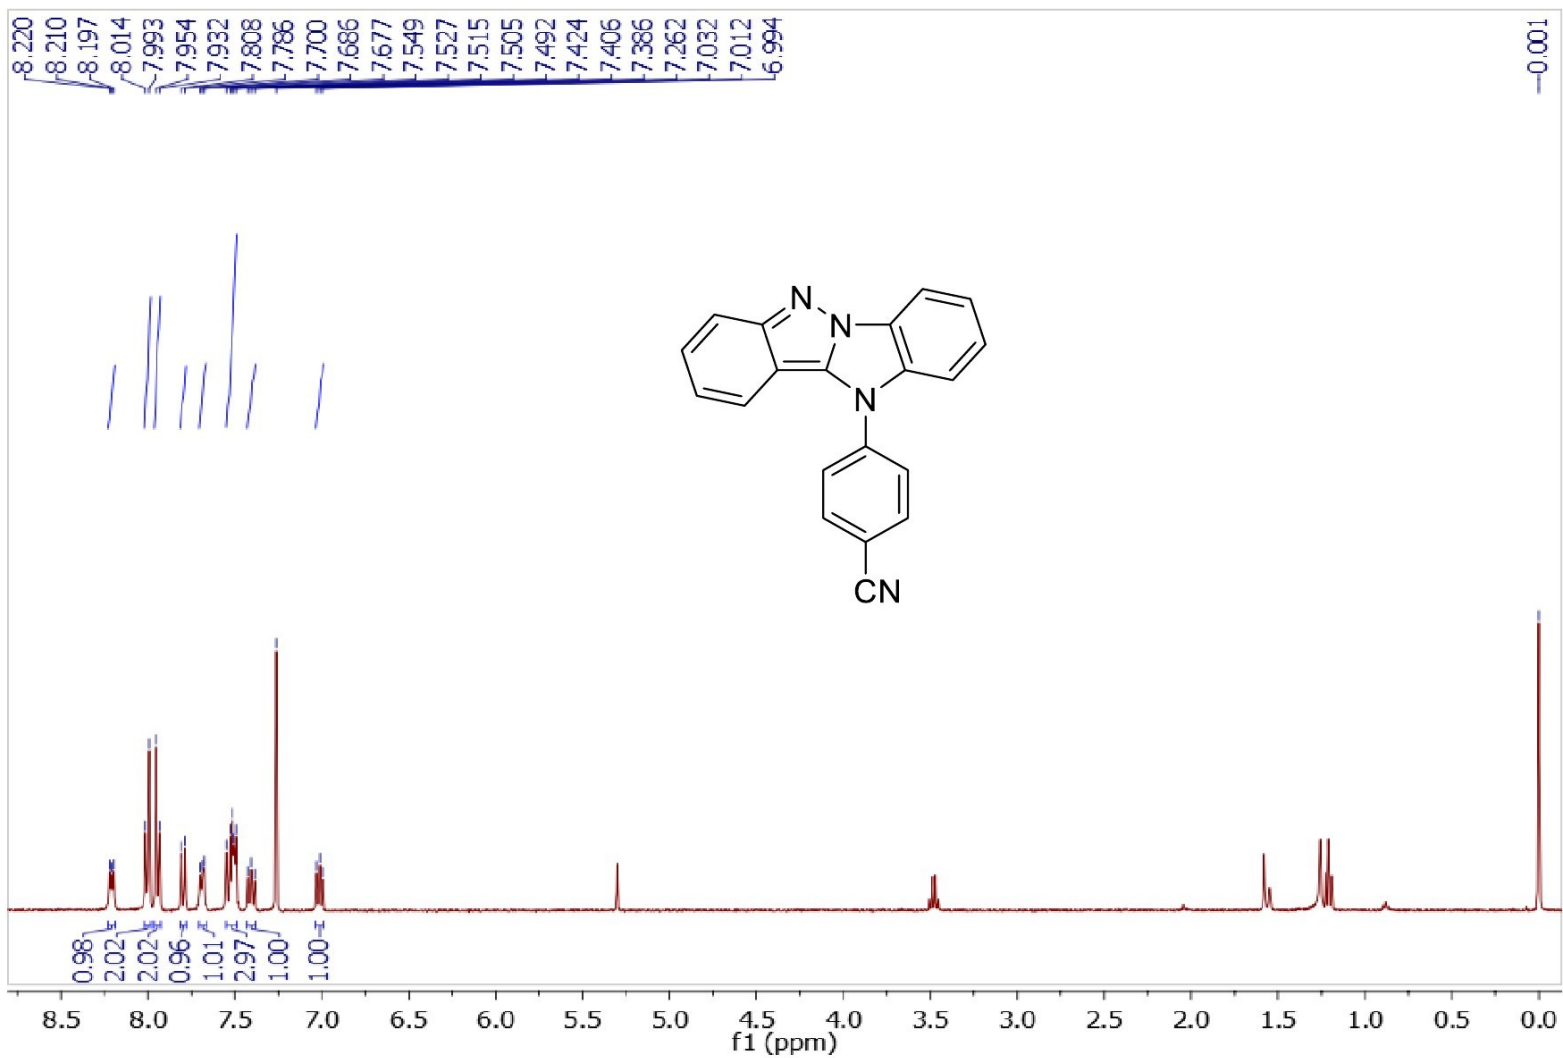

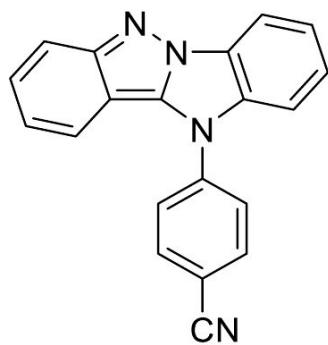

153.63  
139.84  
135.49  
134.29  
134.22  
127.33  
126.53  
125.40  
124.58  
123.38  
119.03  
118.75  
117.92  
117.11  
112.70  
111.23  
110.80  
102.90

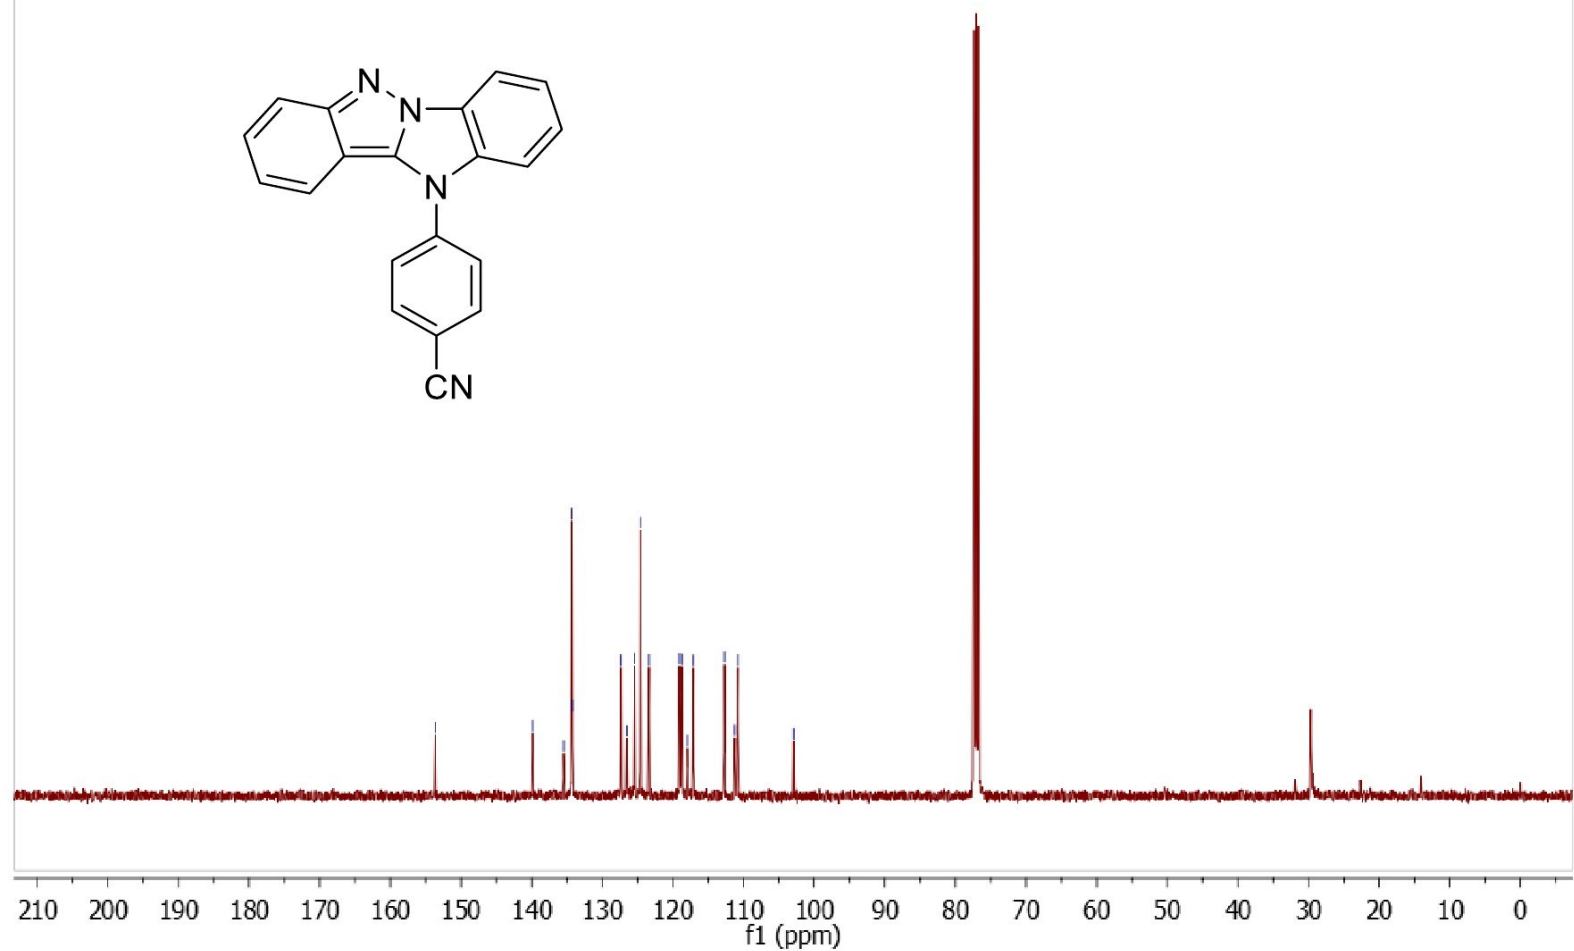

# Compound-3ai

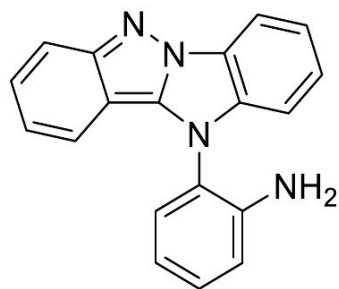

8.130  
8.117  
7.610  
7.592  
7.473  
7.344  
7.304  
7.068  
7.053  
6.857  
6.764

5.441

3.409

2.506

1.00  
0.99  
2.02  
5.01  
0.98  
2.02

2.00

8.5 8.0 7.5 7.0 6.5 6.0 5.5 5.0 4.5 4.0 3.5 3.0 2.5 2.0 1.5 1.0 0.5 0.0

f1 (ppm)

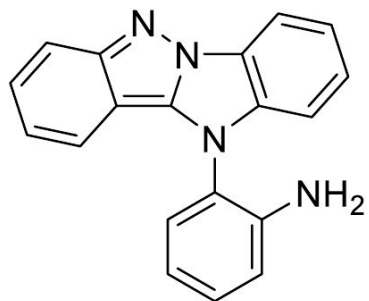

153.06  
146.00  
137.66  
135.86  
130.62  
128.48  
127.03  
125.96  
125.11  
122.01  
119.85  
119.12  
117.65  
116.80  
116.72  
116.27  
112.19  
112.09  
103.15

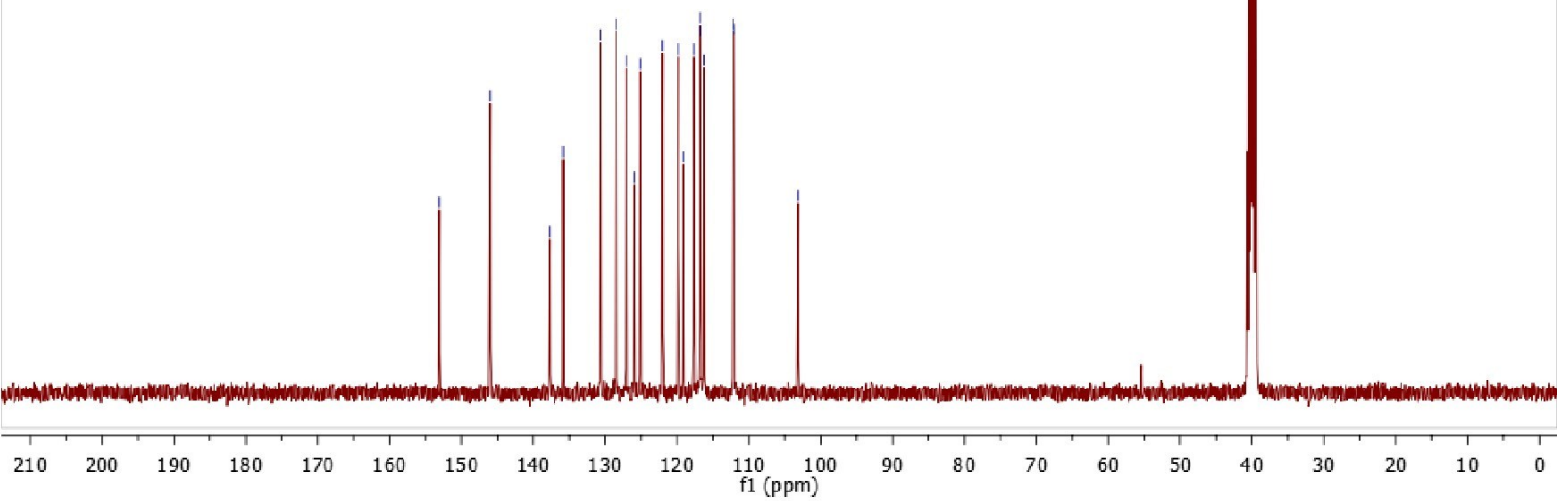

# Compound-3aj

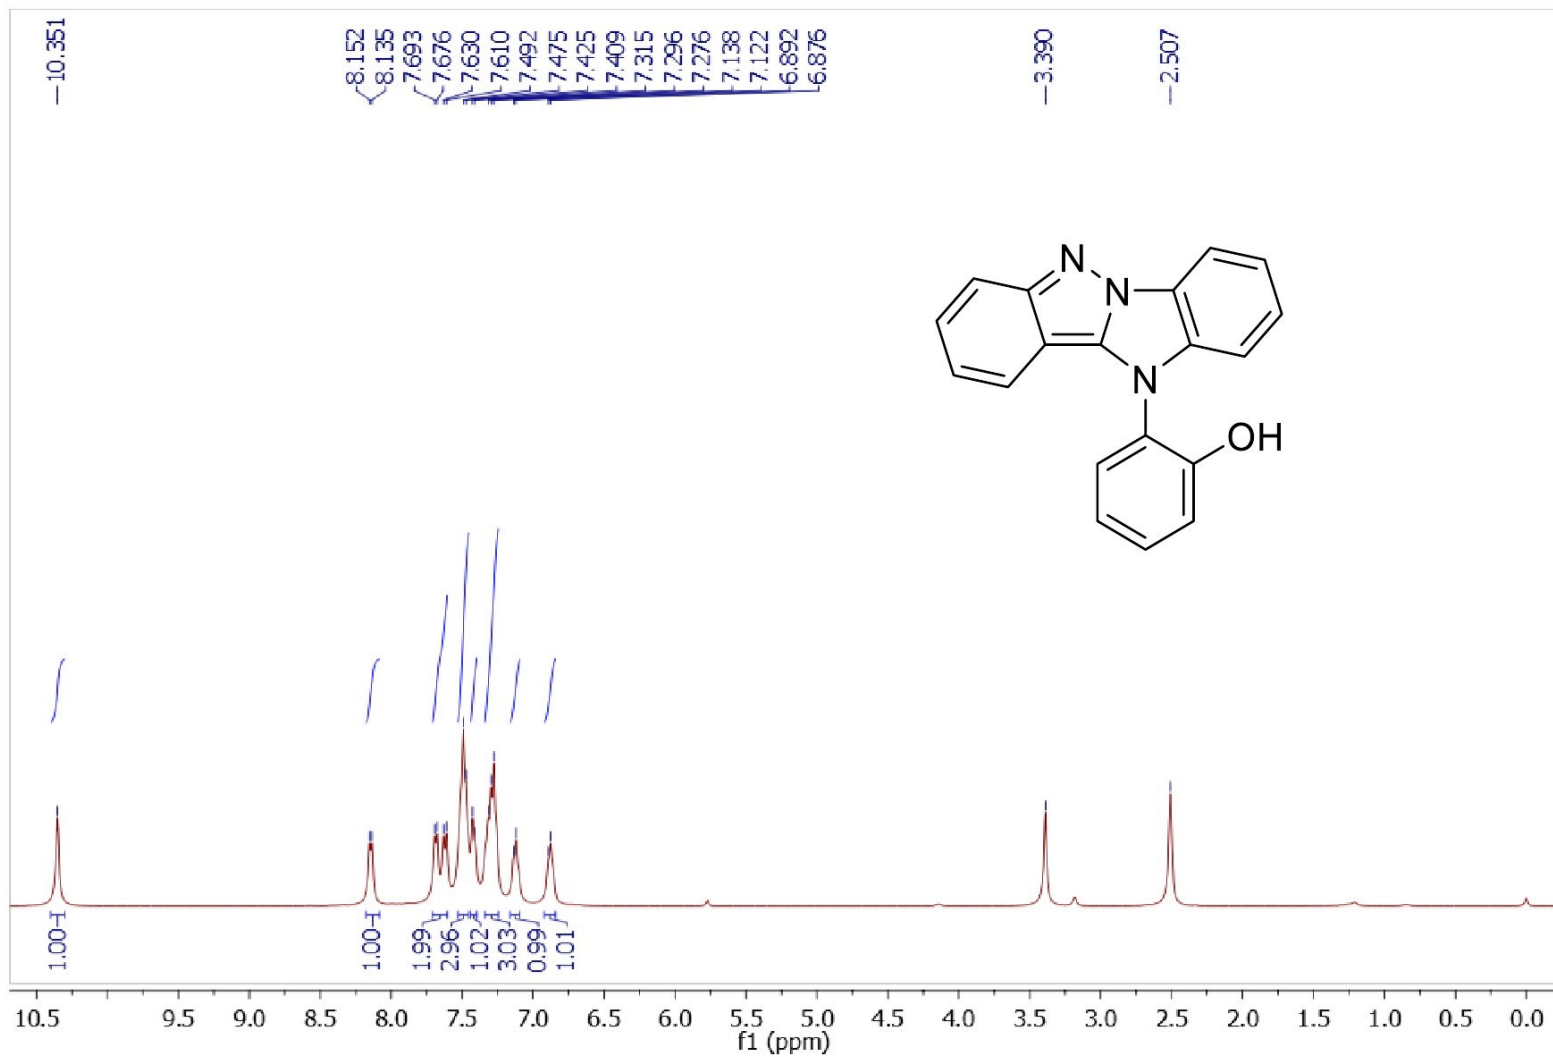

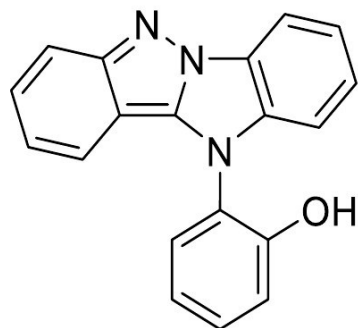

153.16  
152.60  
137.11  
135.35  
130.47  
128.13  
126.68  
124.95  
124.88  
121.78  
121.70  
119.98  
119.19  
117.48  
117.43  
115.89  
111.90  
111.57  
102.66

210 200 190 180 170 160 150 140 130 120 110 100 90 80 70 60 50 40 30 20 10 0 -10

f1 (ppm)

# Compound-3ak

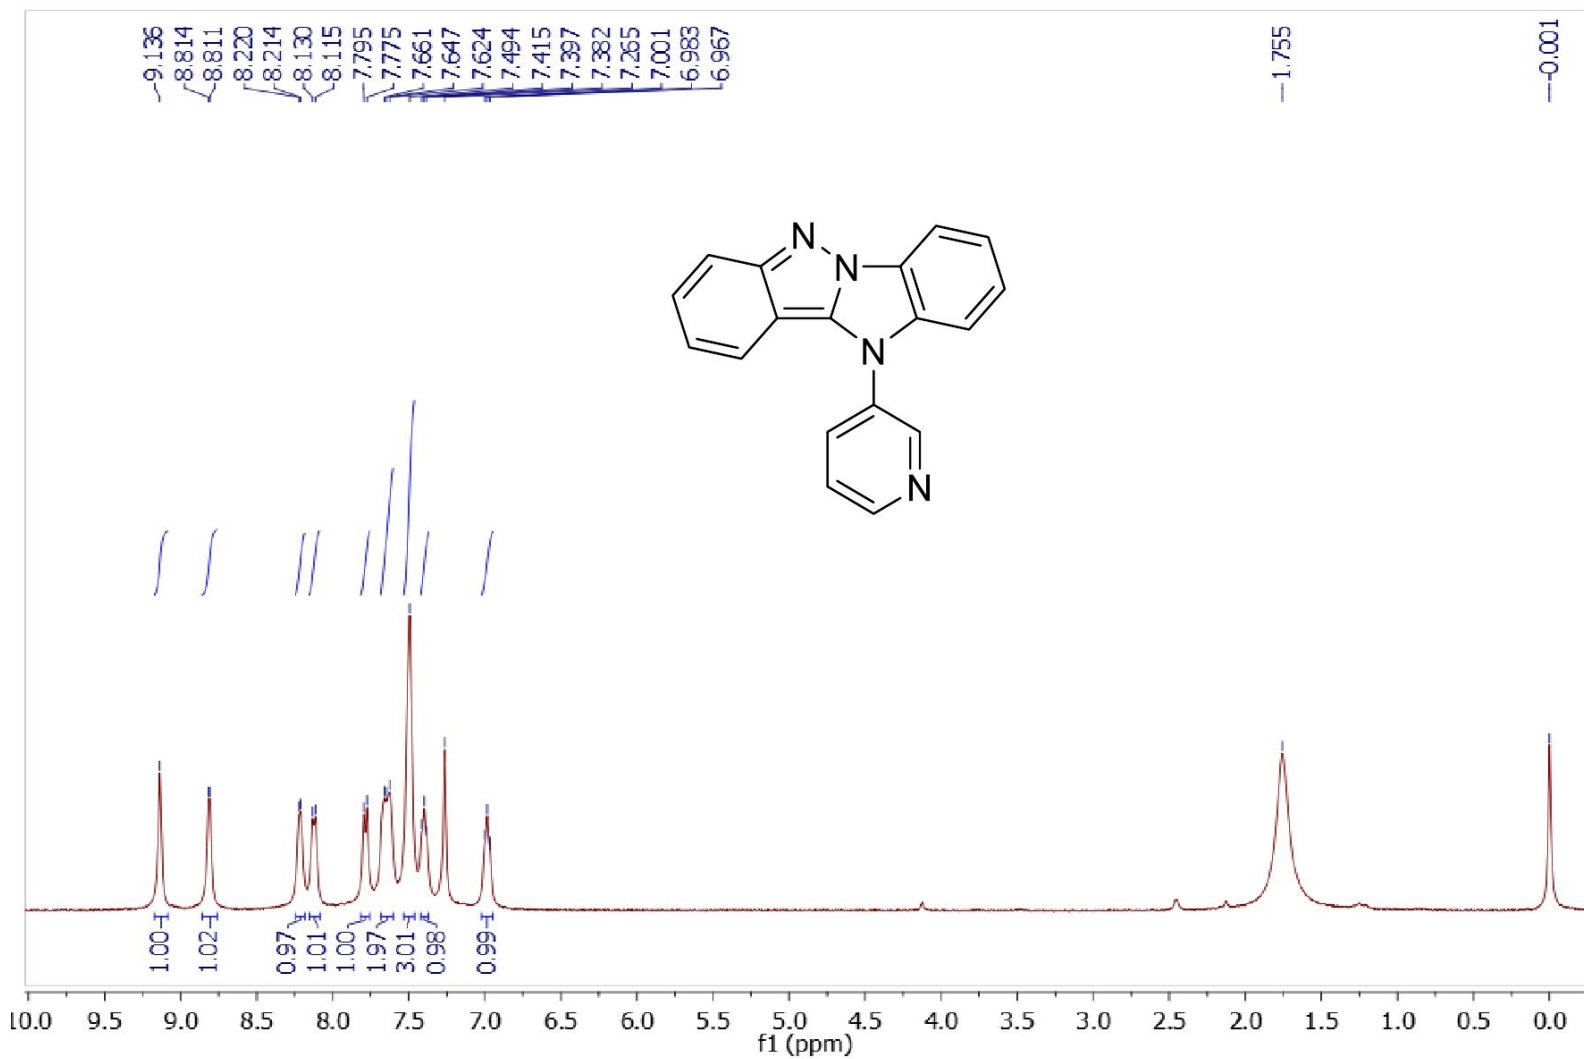

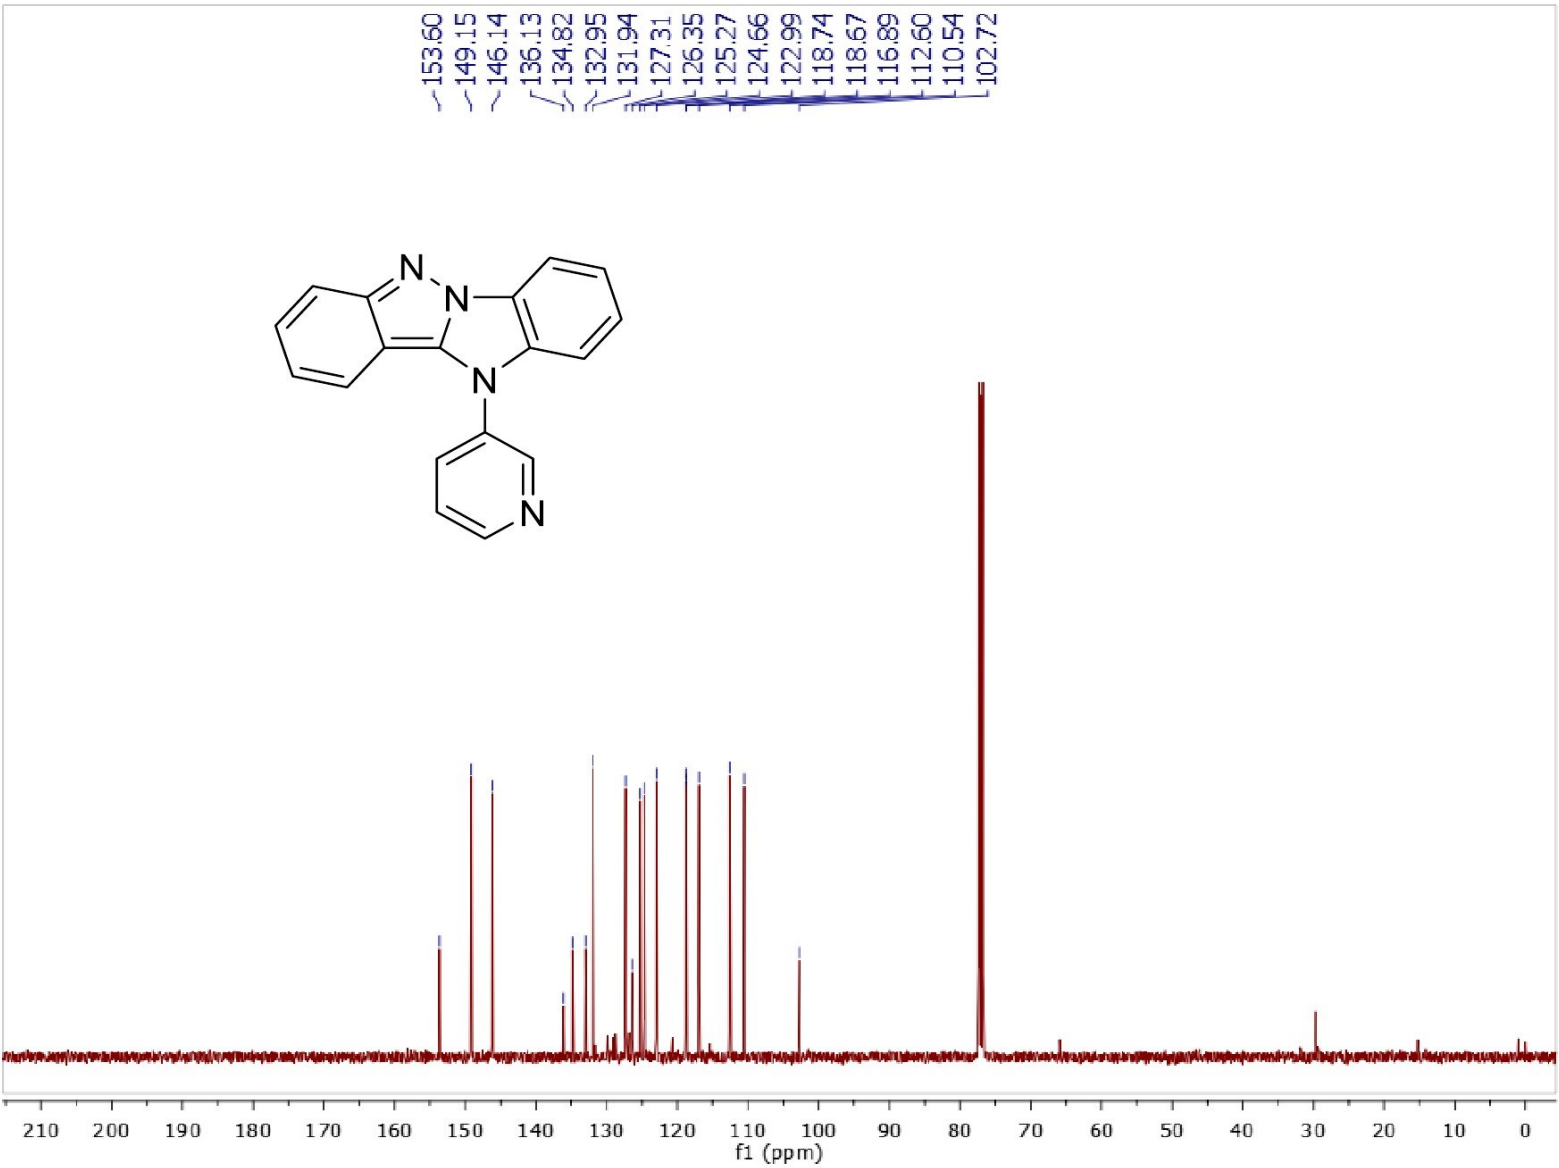

# Compound-3al

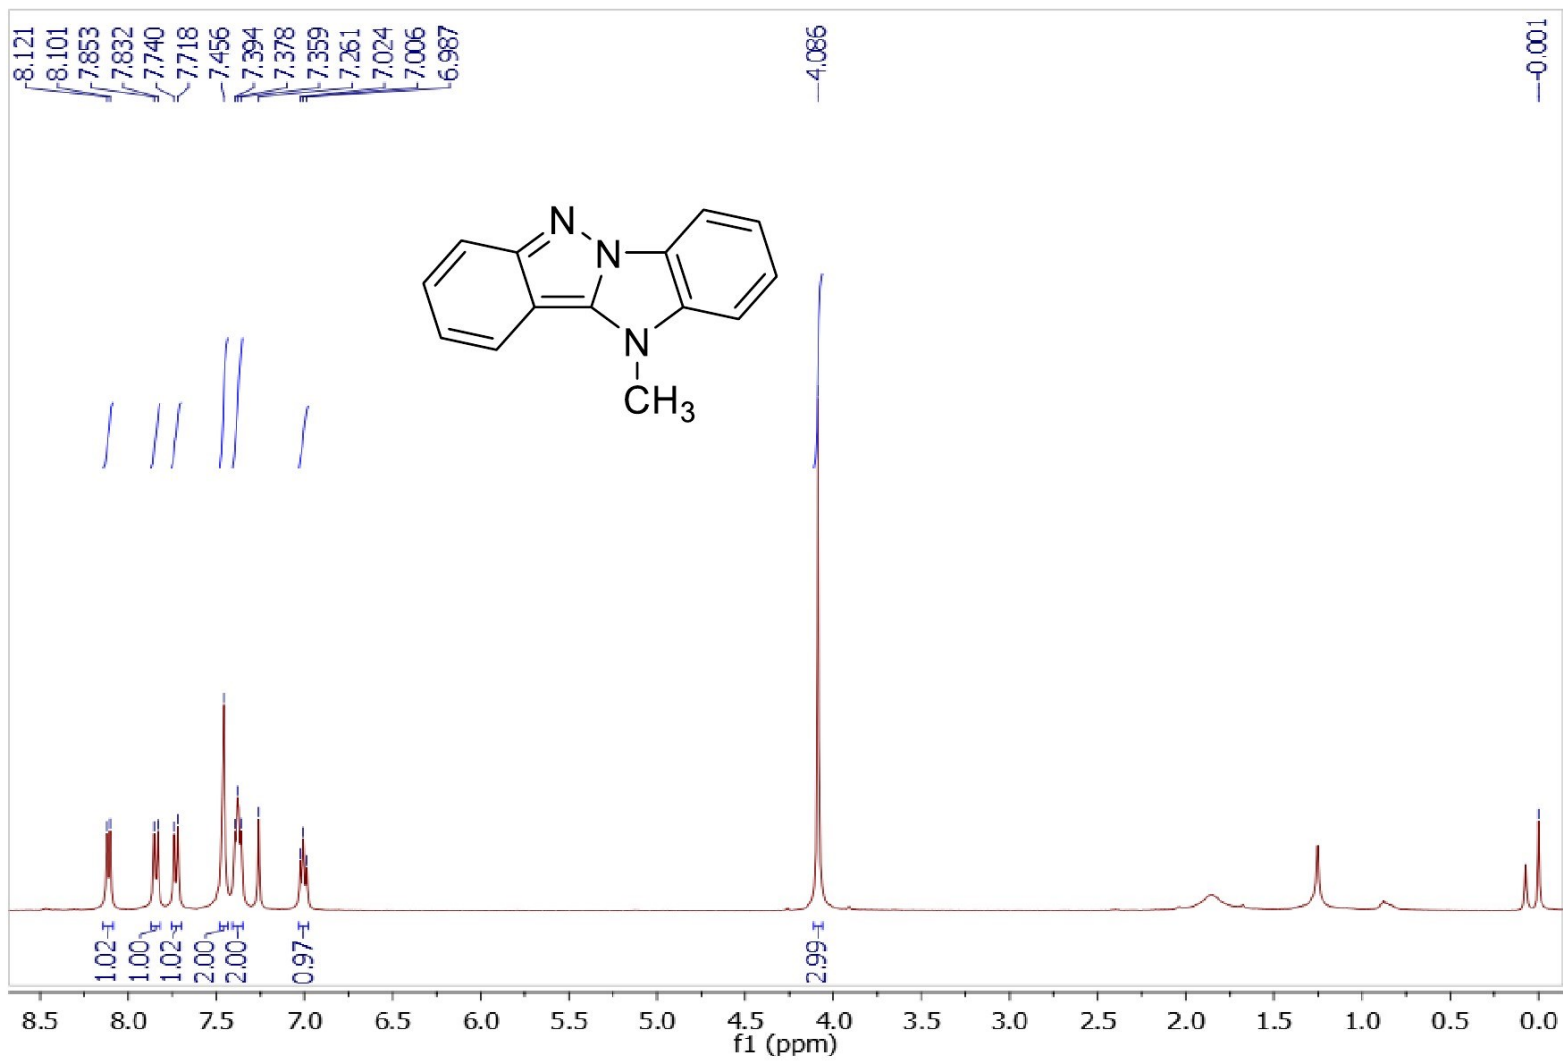

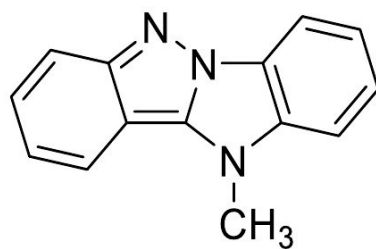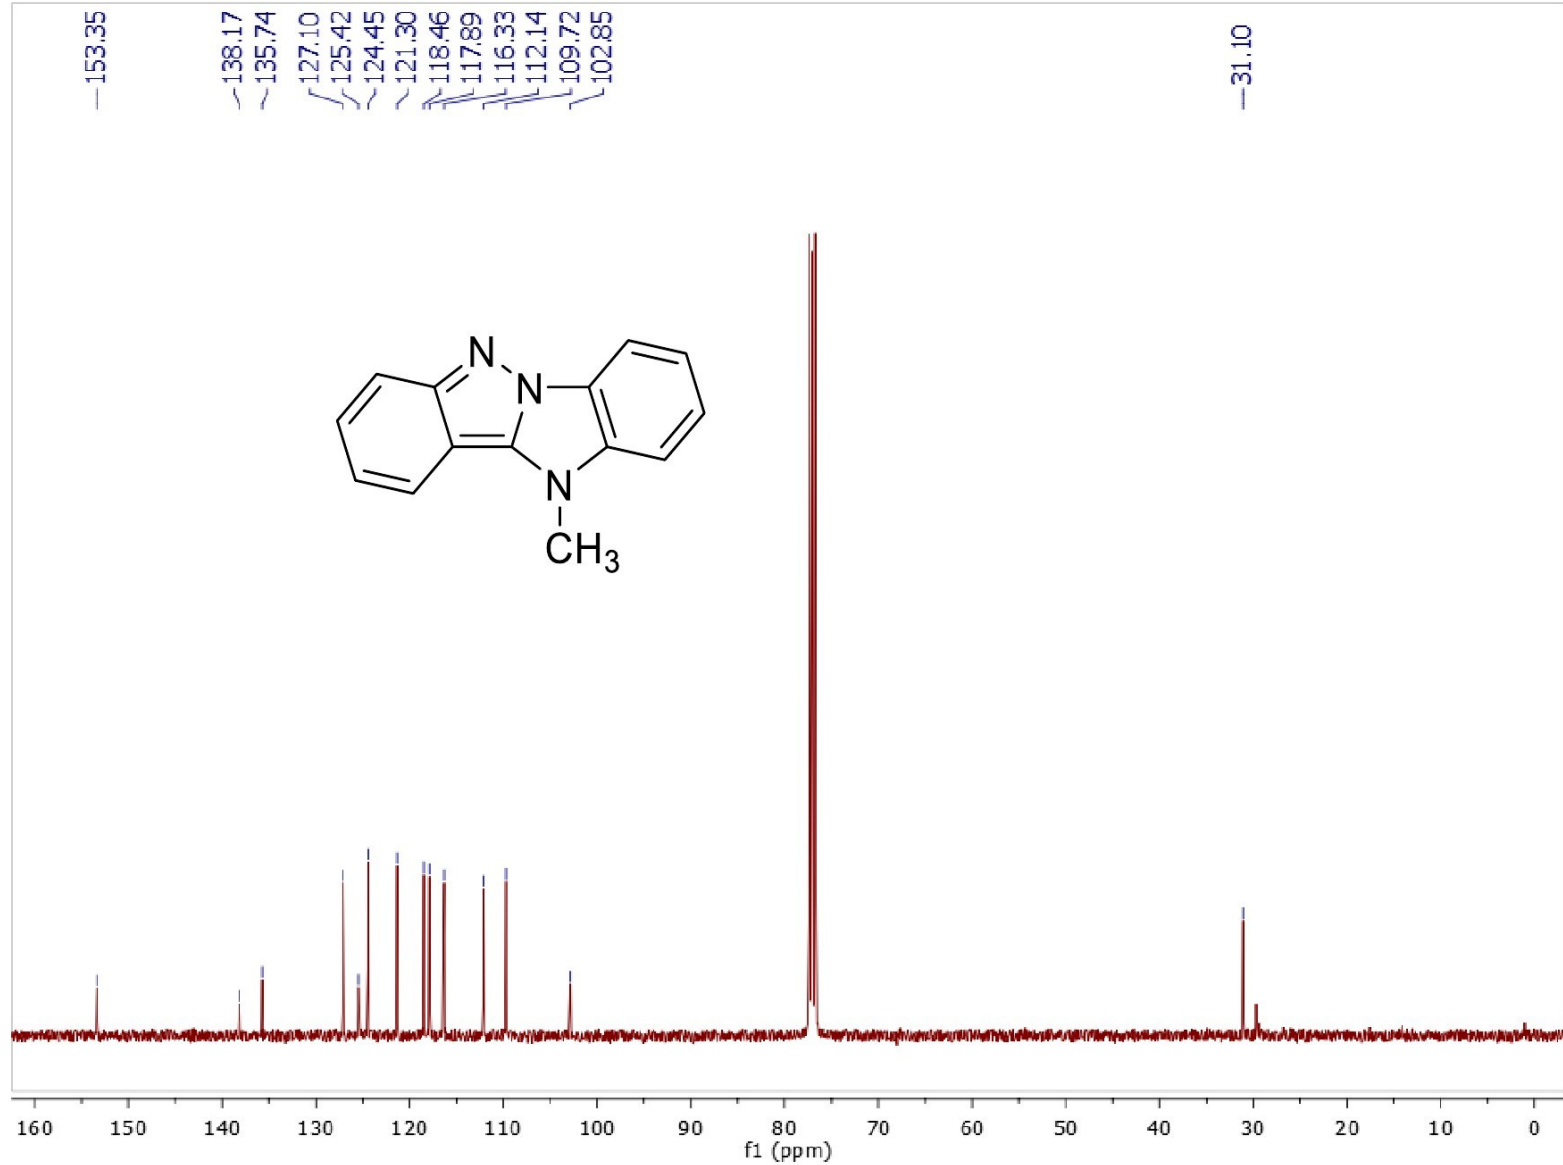

# Compound-3ba

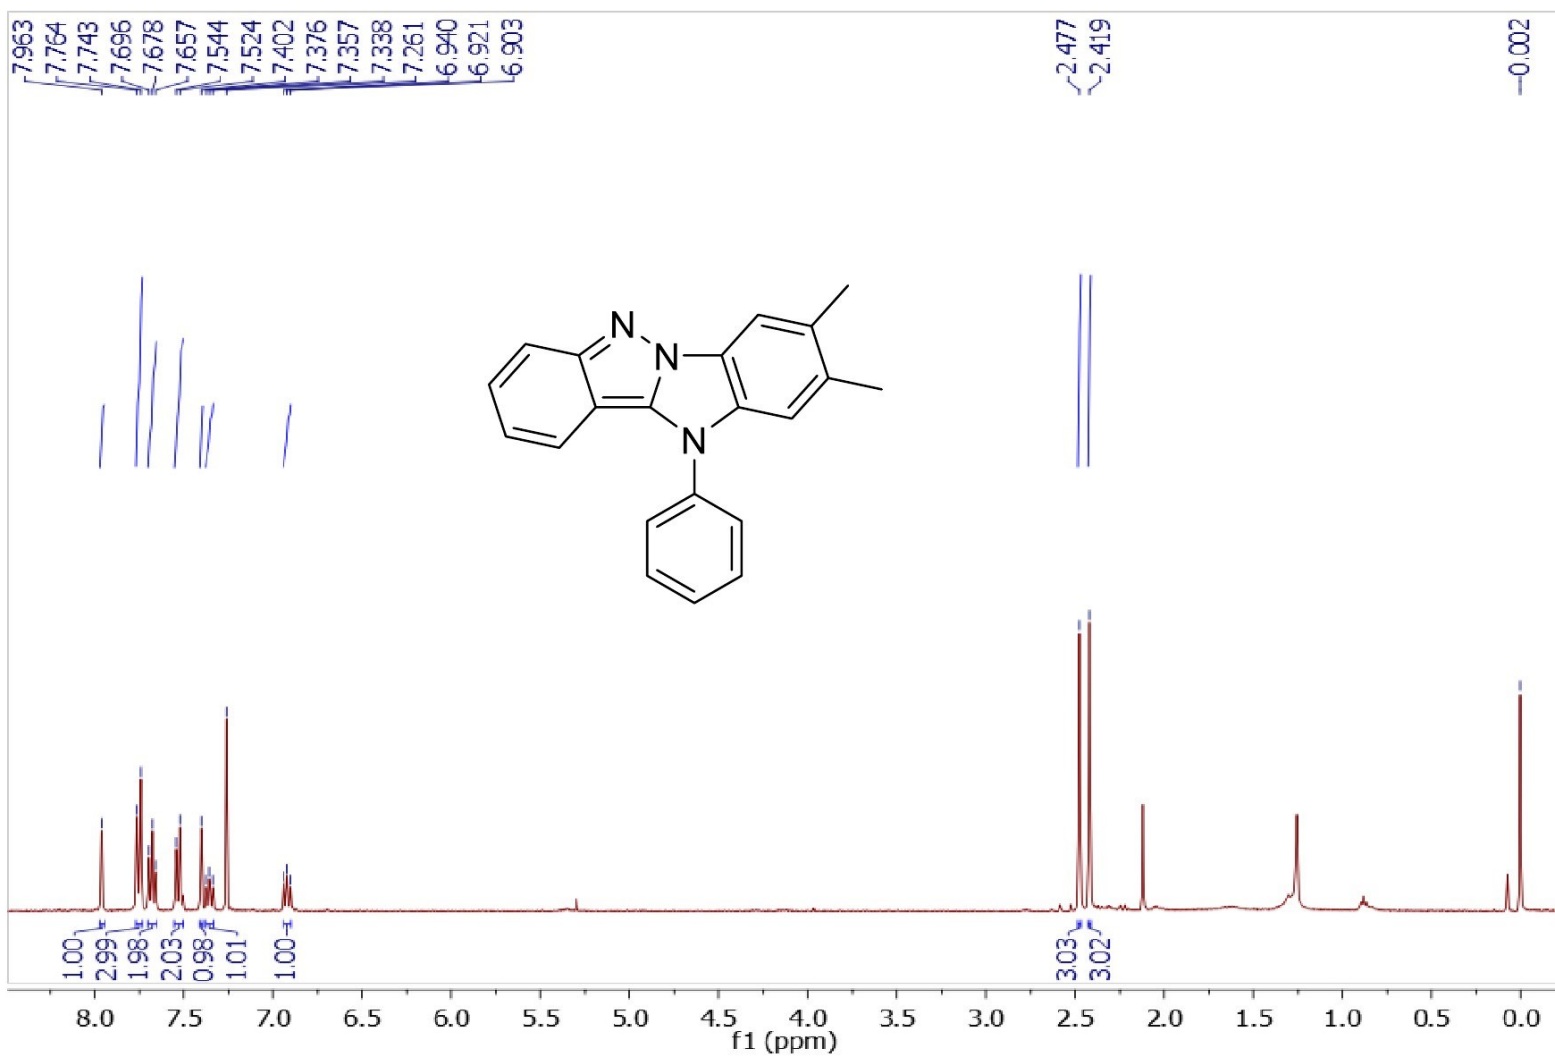

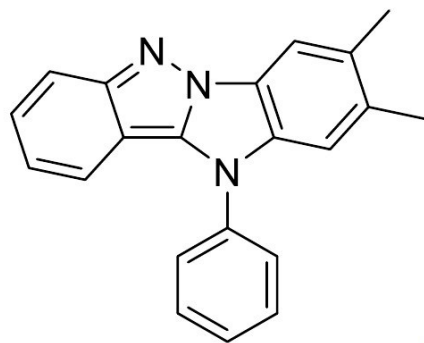

153.38  
 136.37  
 136.17  
 134.15  
 133.47  
 131.46  
 130.16  
 127.82  
 126.78  
 124.62  
 124.44  
 119.13  
 117.80  
 116.49  
 112.67  
 111.40  
 103.10

20.64  
 20.28

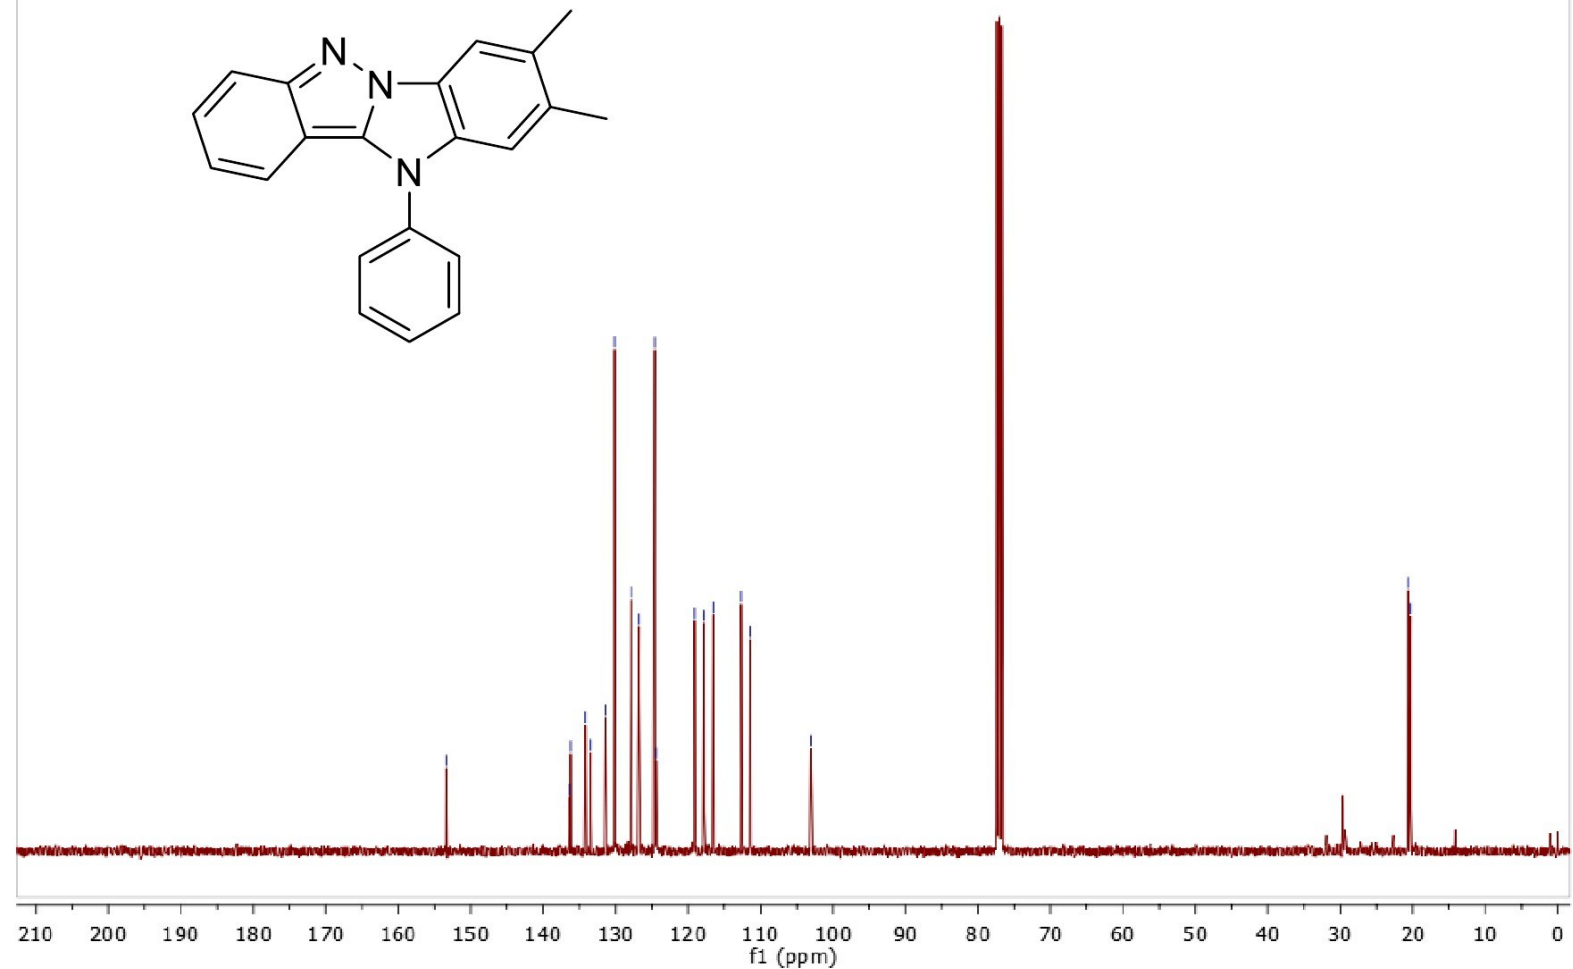

# Compound-3bc

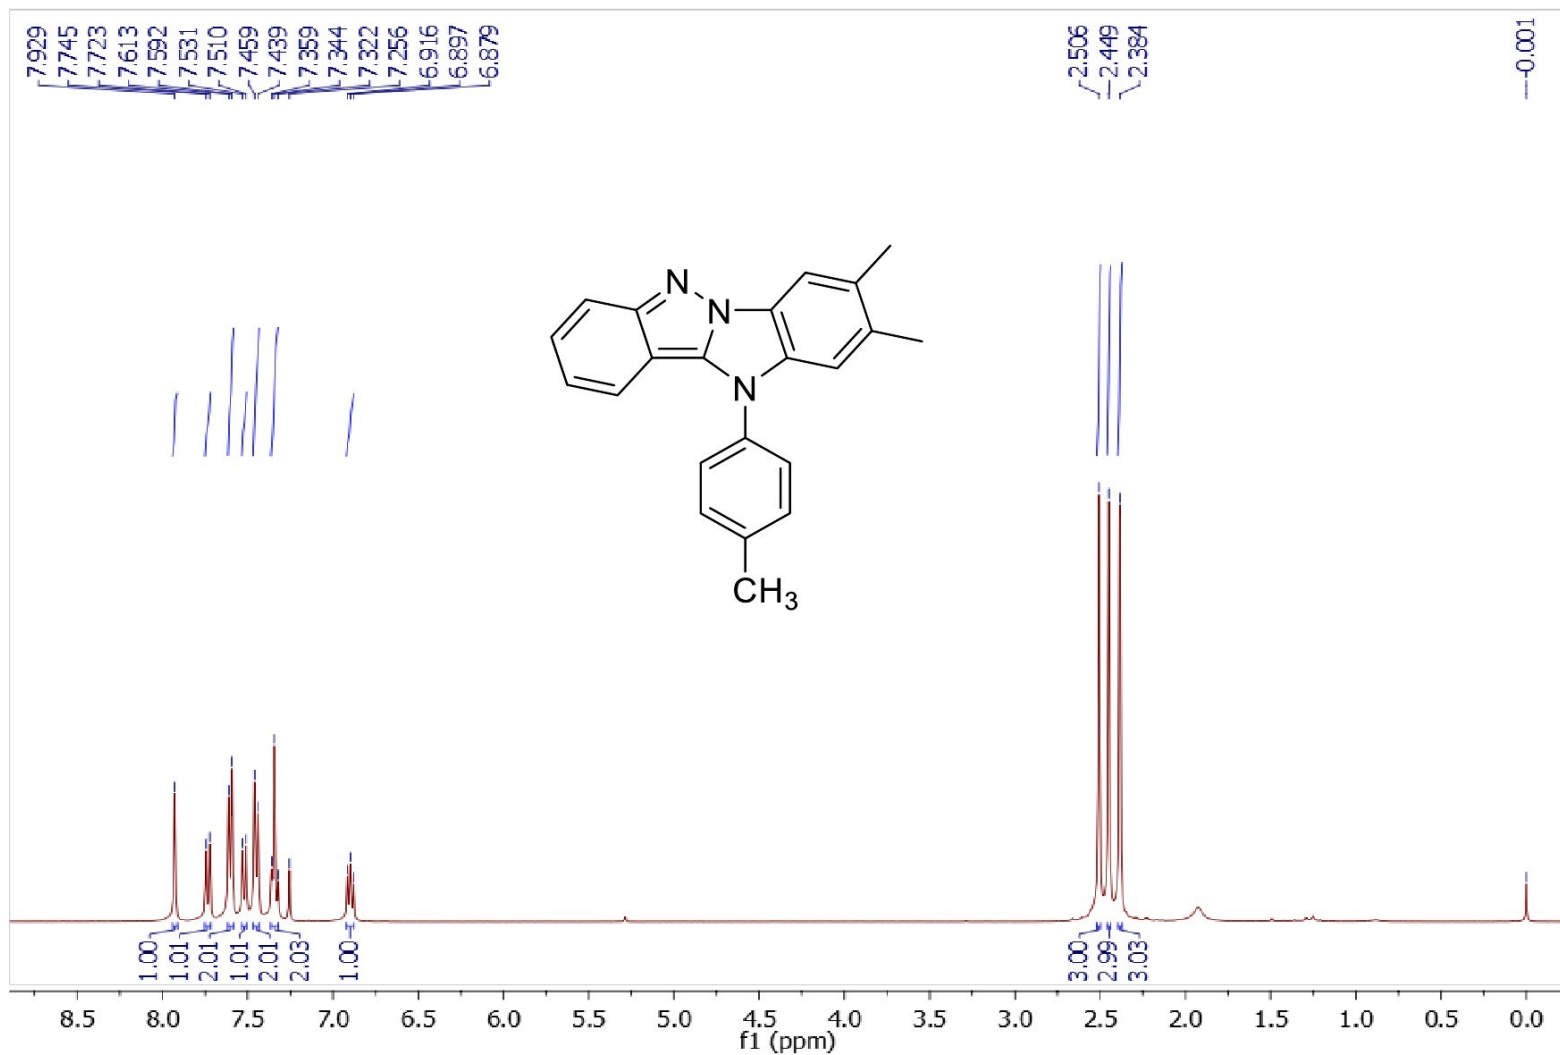

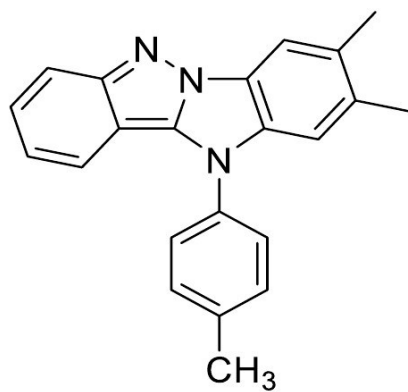

153.35  
137.94  
136.58  
134.06  
133.66  
133.49  
131.27  
130.70  
126.75  
124.59  
124.34  
119.18  
117.67  
116.39  
112.61  
111.40  
103.11

21.25  
20.62  
20.27

210 200 190 180 170 160 150 140 130 120 110 100 90 80 70 60 50 40 30 20 10 0 -10

f1 (ppm)

# Compound-3bd

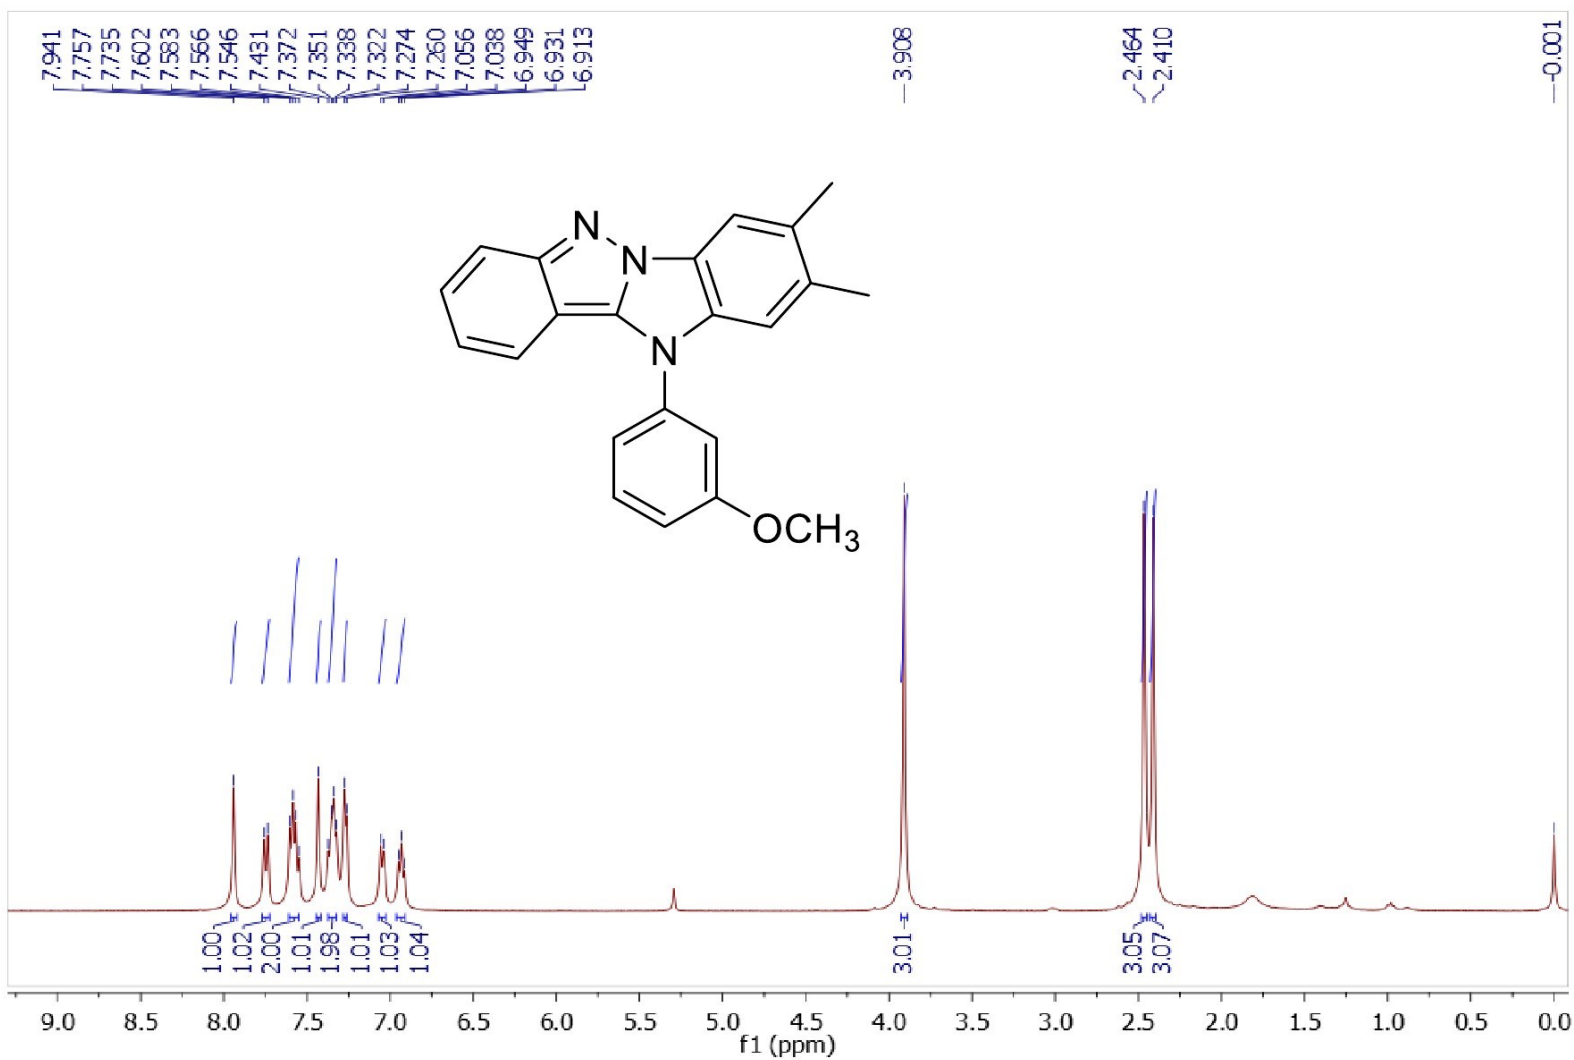

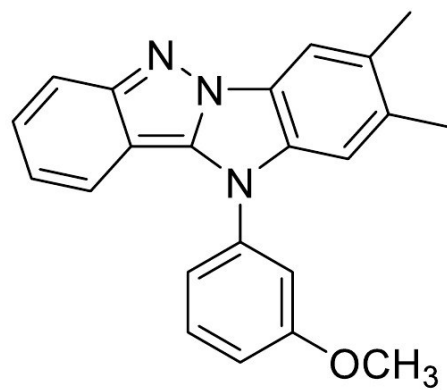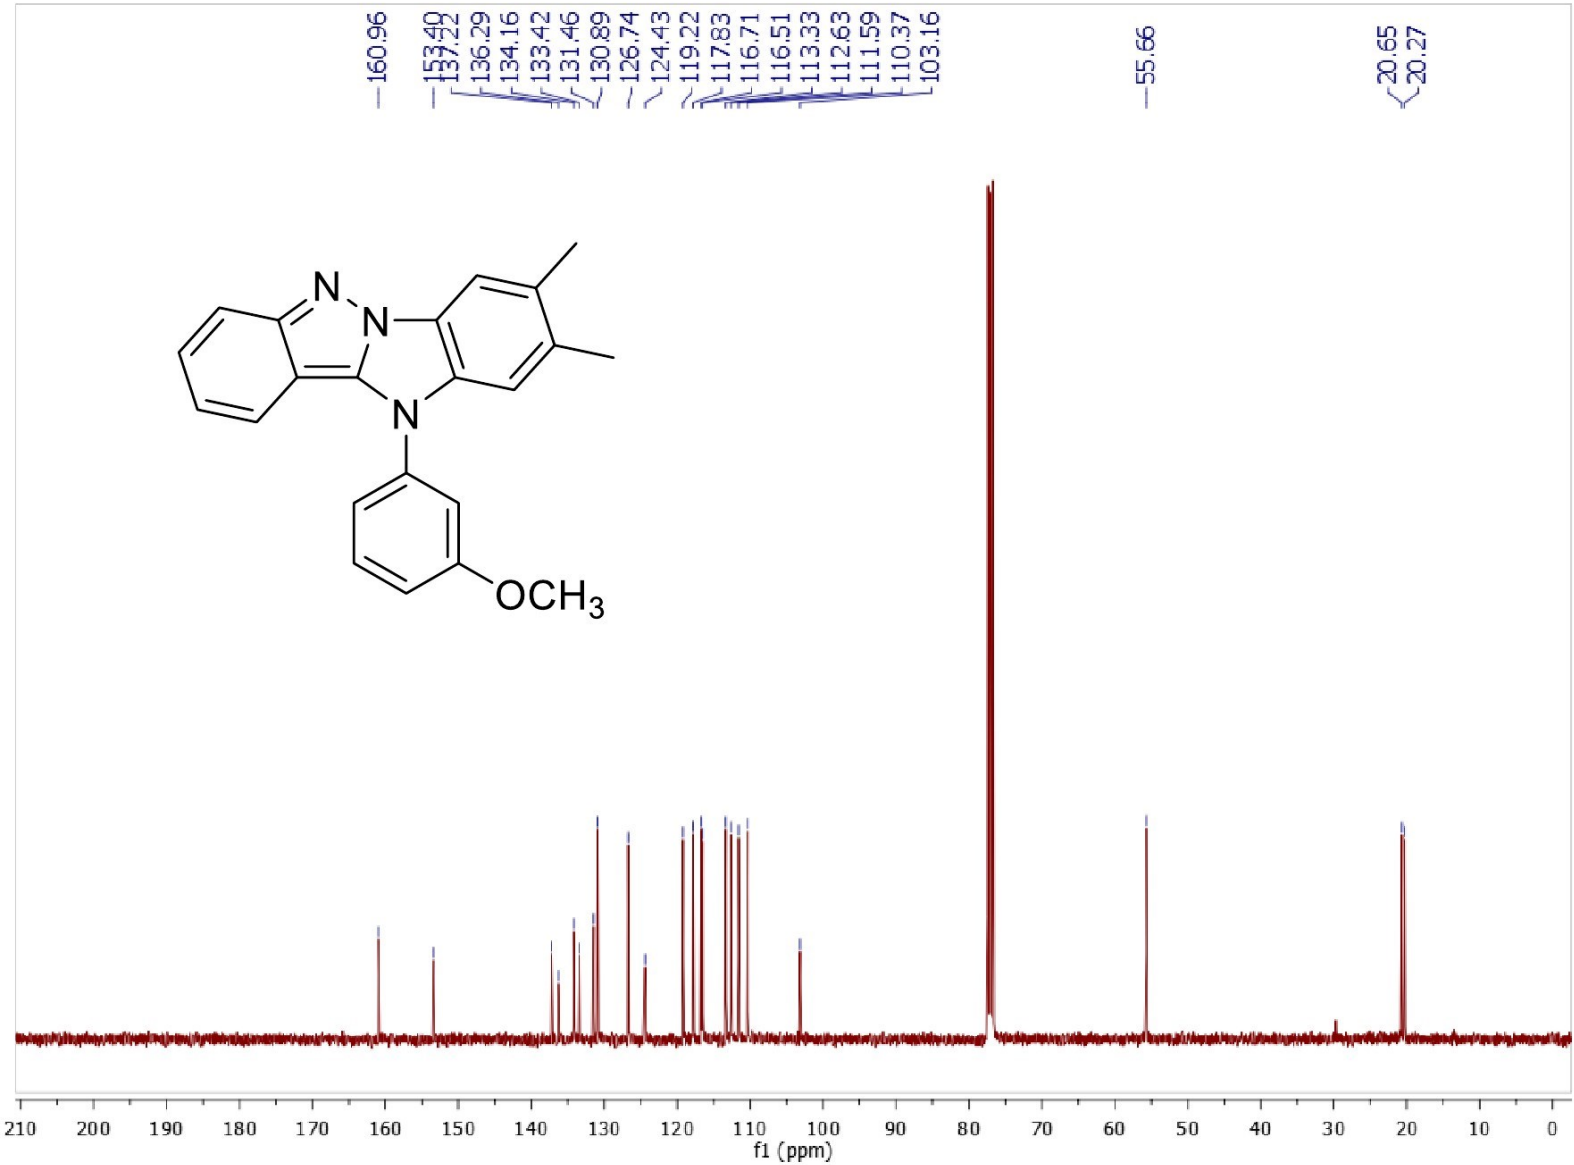

# Compound-3be

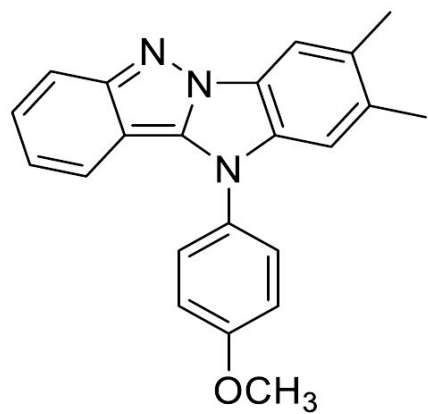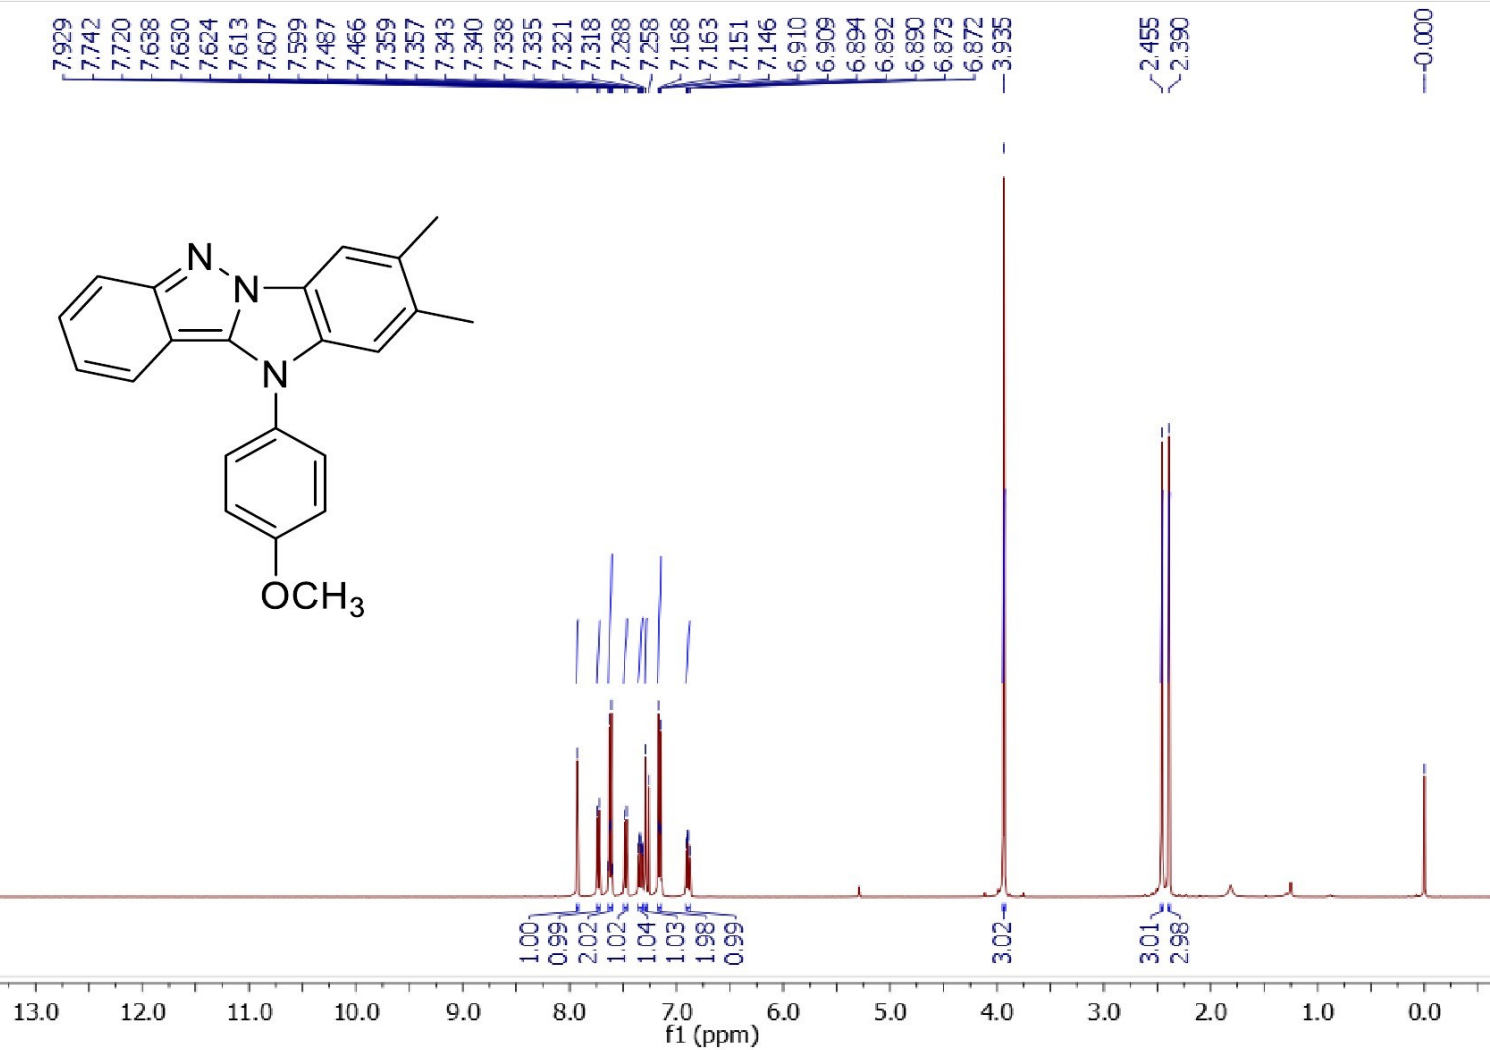

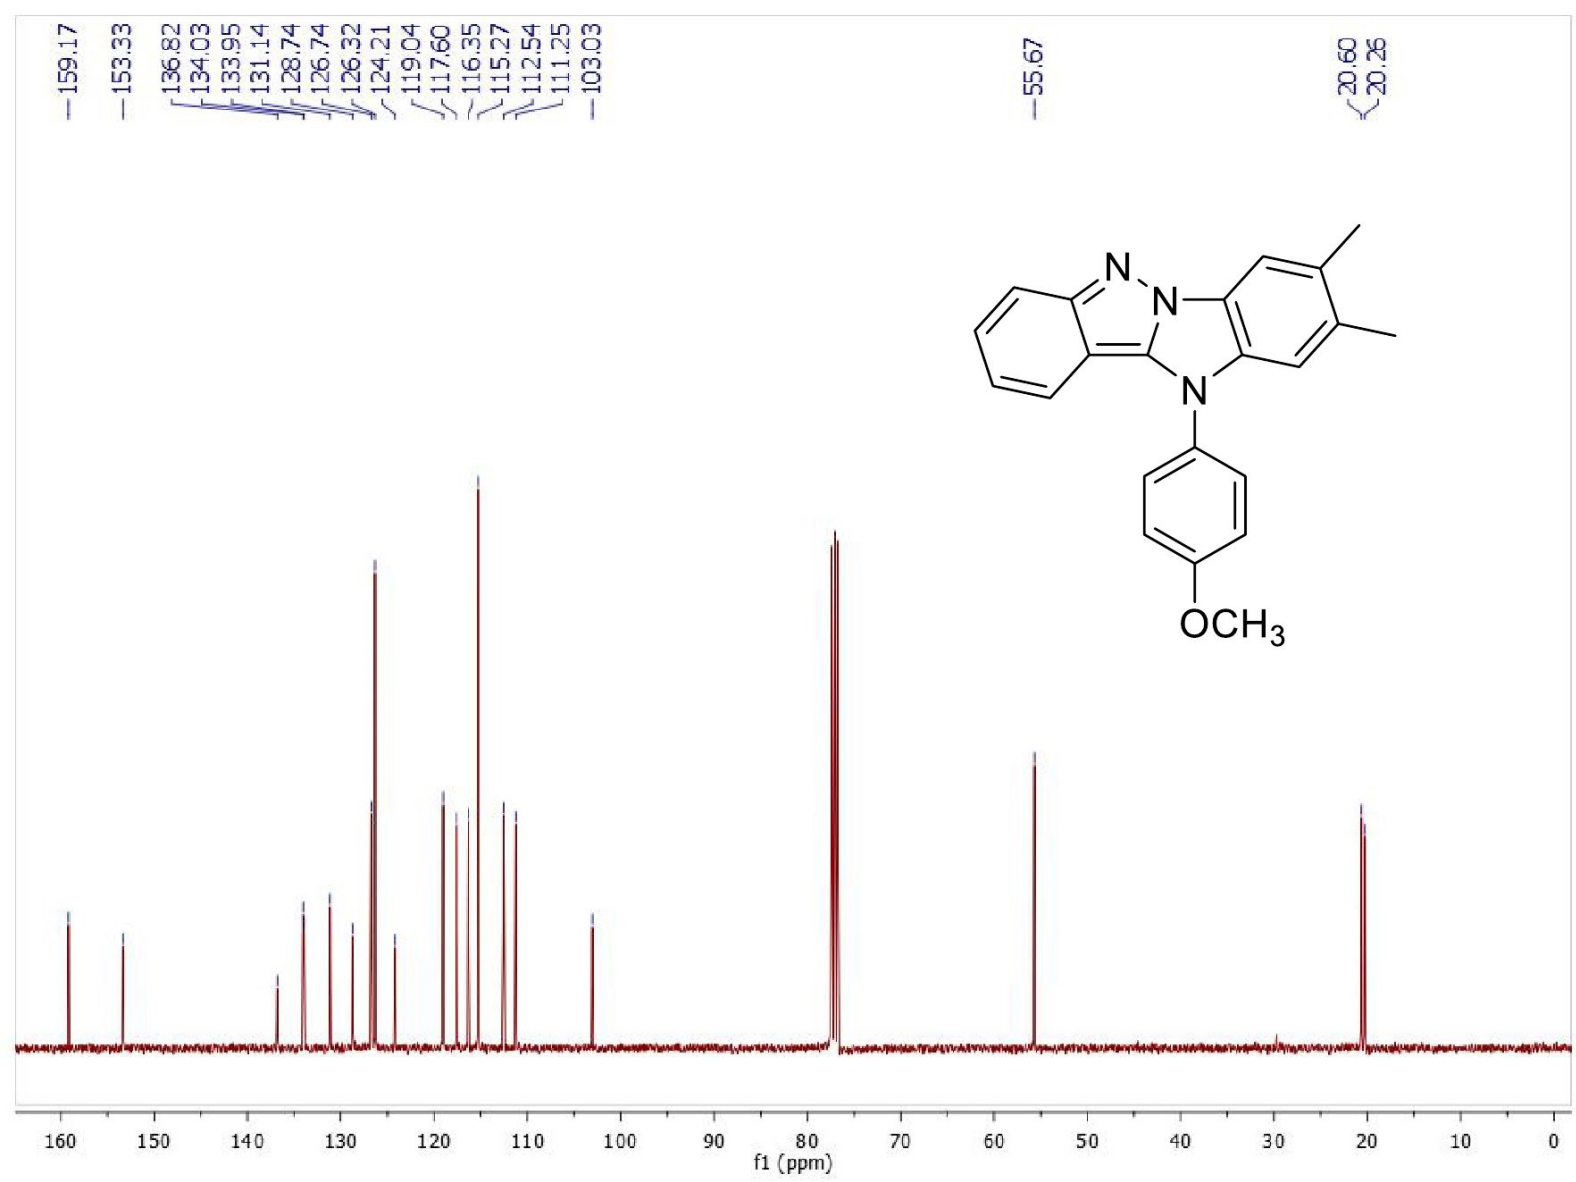

## Compound-3bg

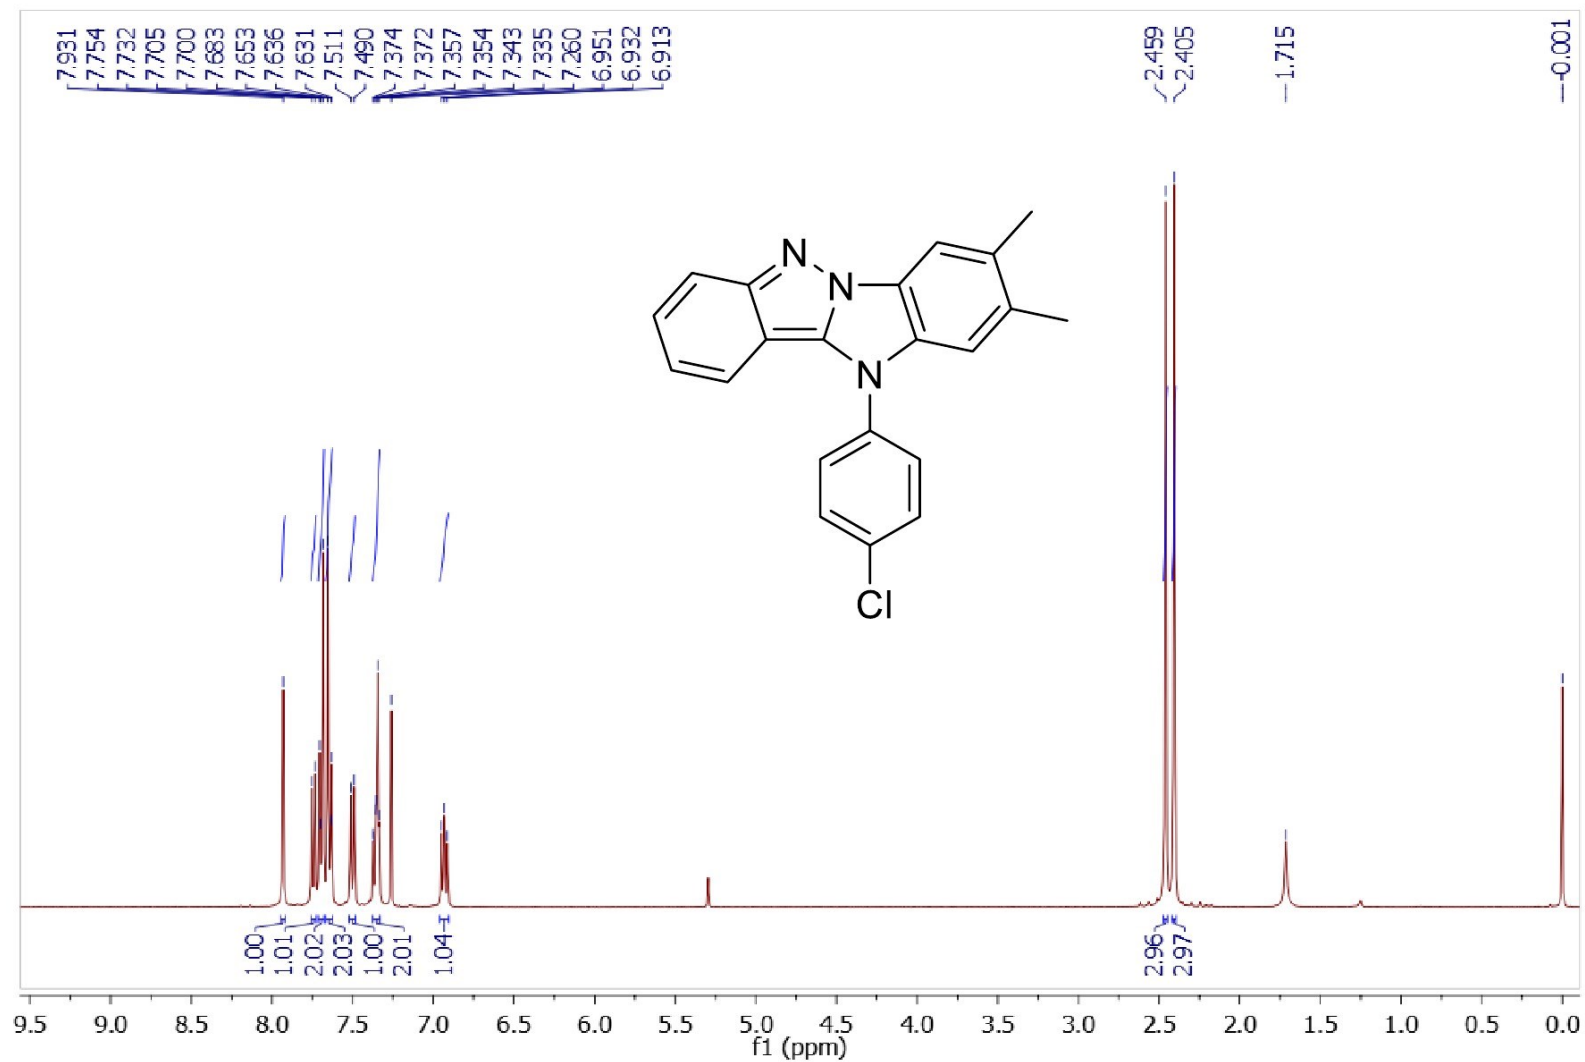

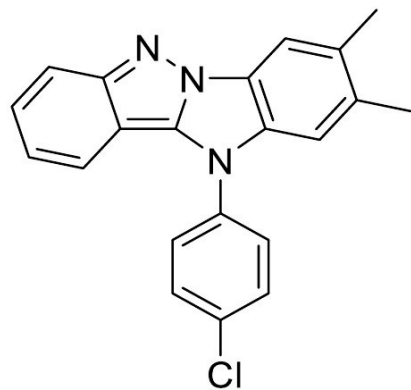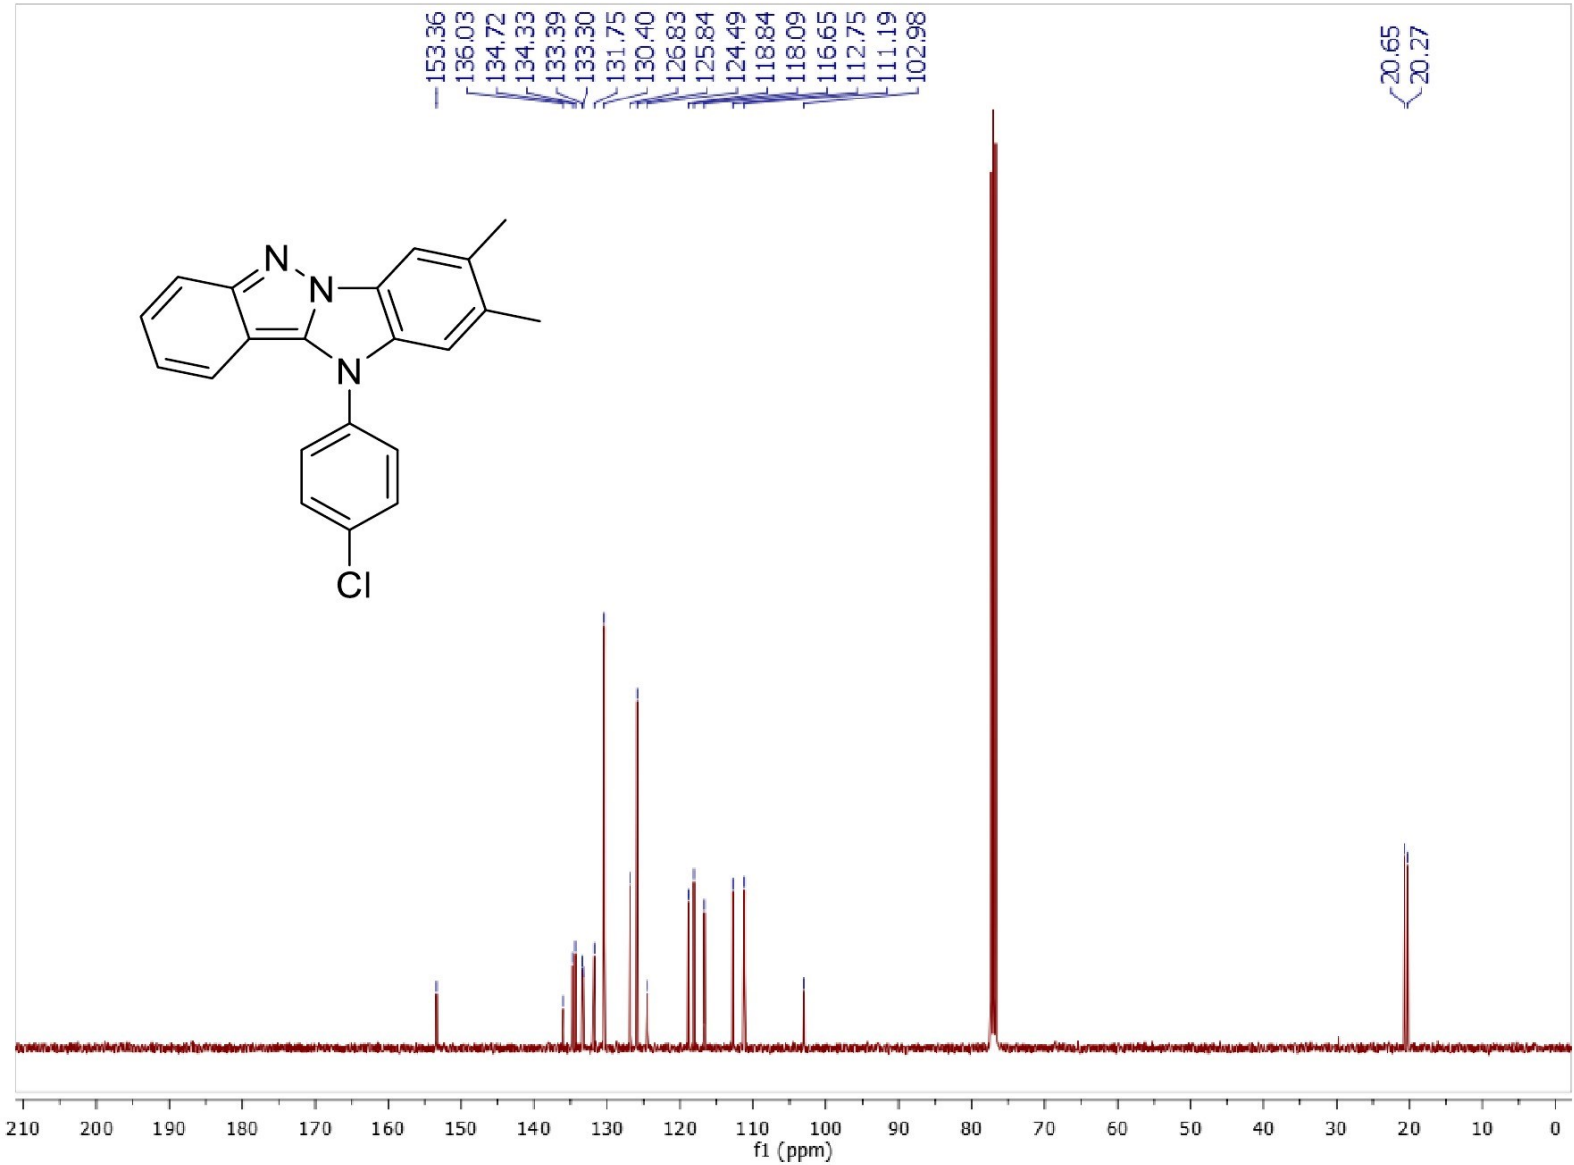

# Compound-3bj

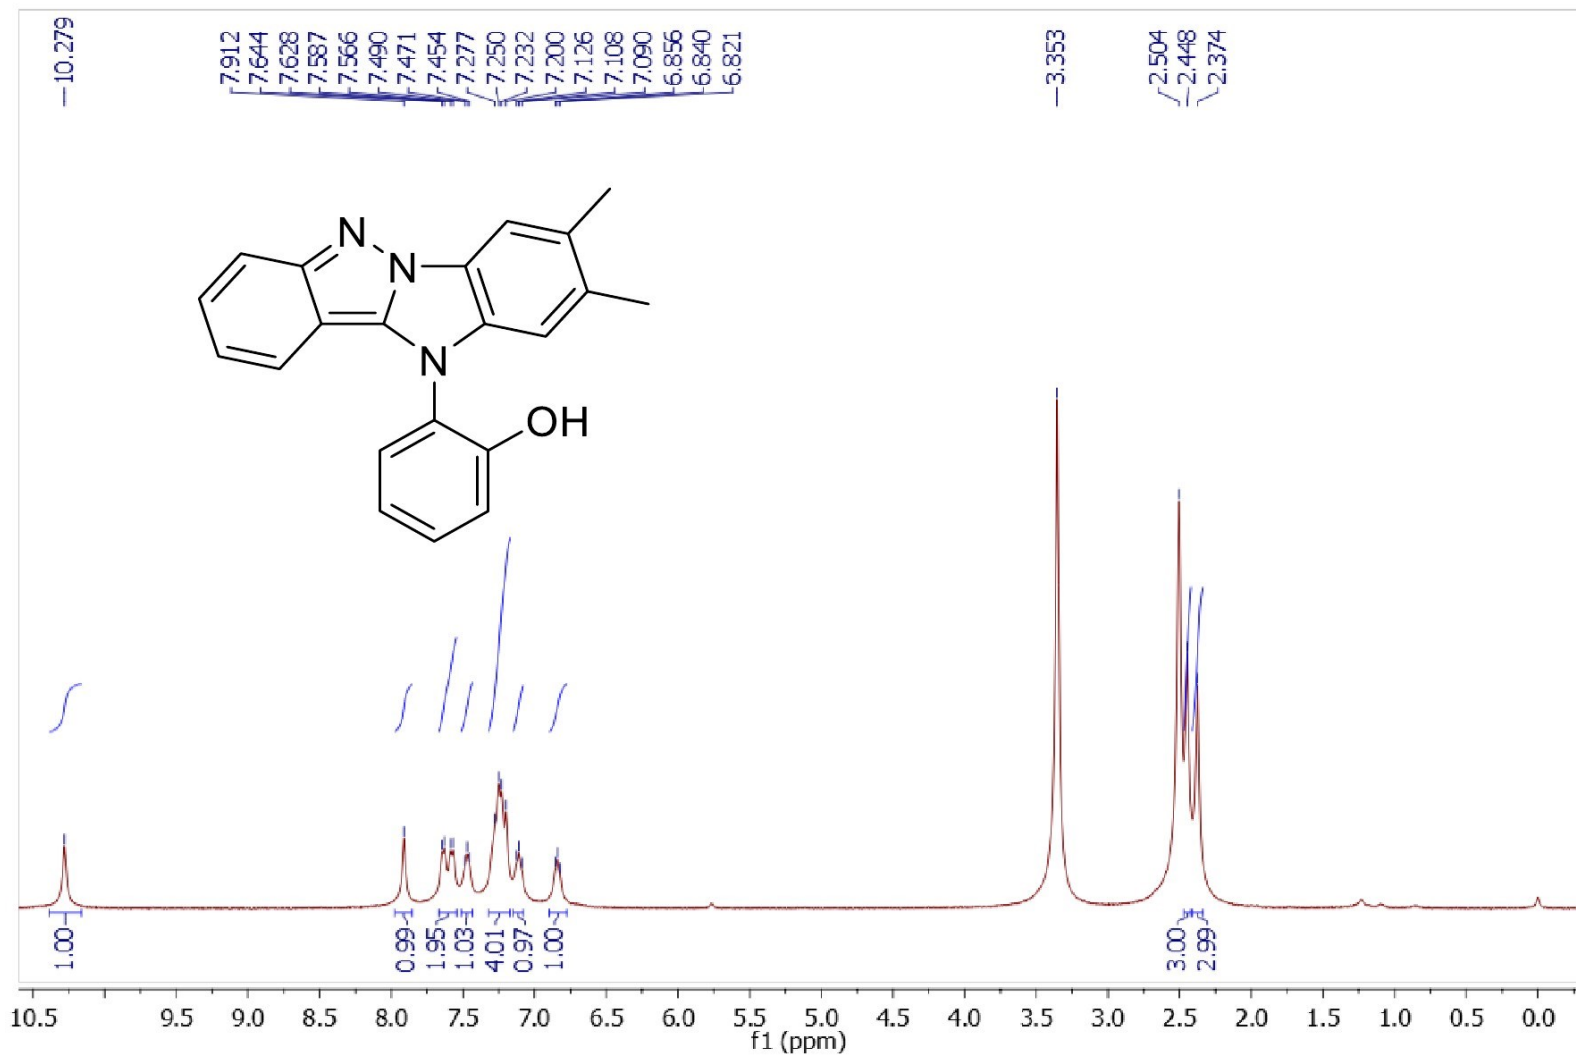

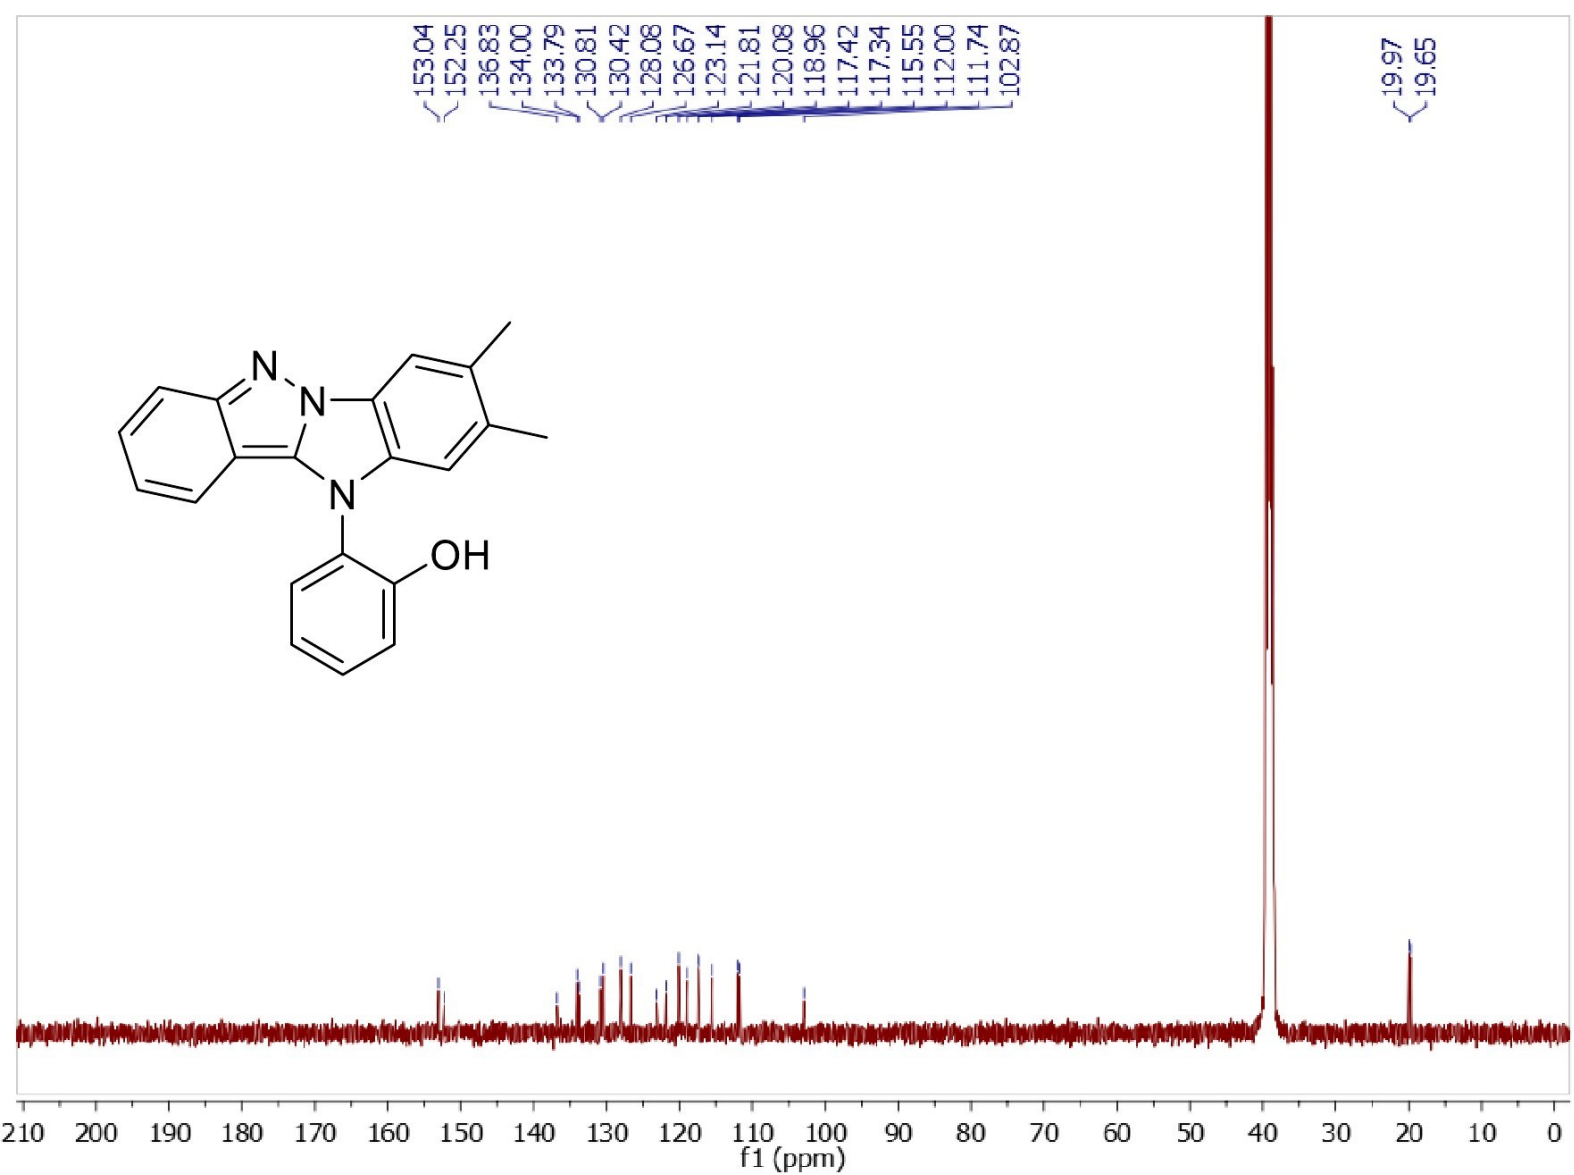

# Compound-3bl

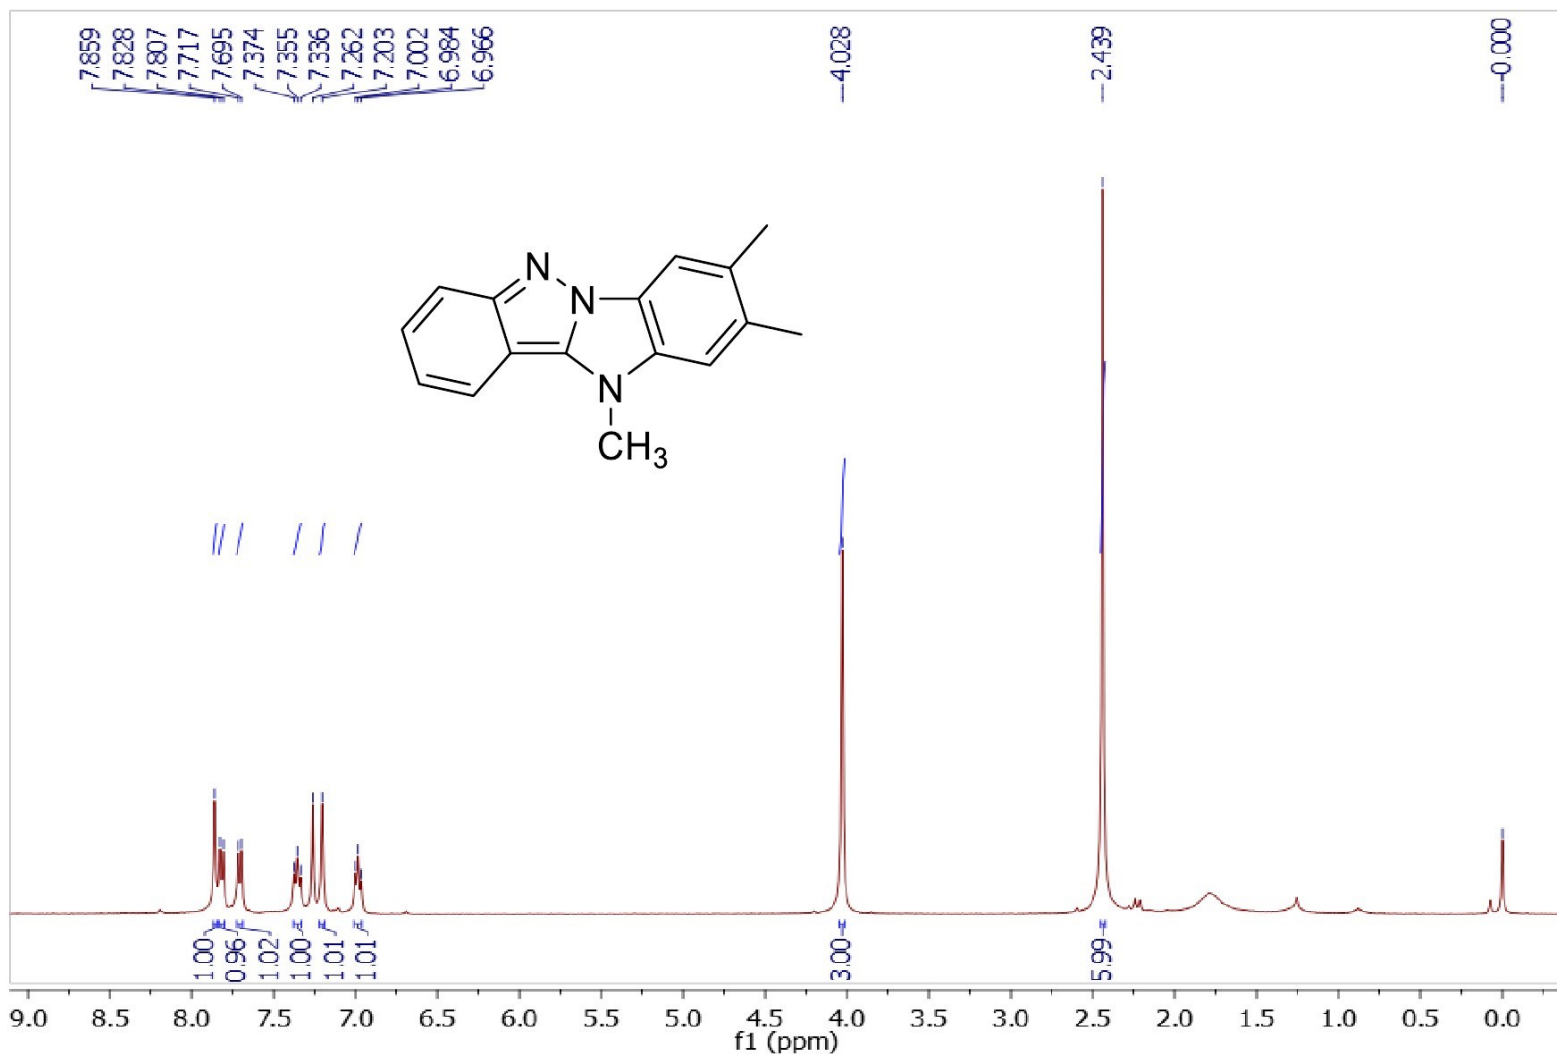

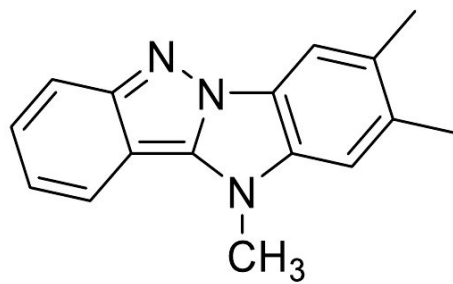

153.08  
137.88  
134.26  
133.68  
130.32  
126.73  
123.79  
118.35  
117.58  
116.19  
112.45  
110.26  
103.08  
31.04  
20.65  
20.23

f1 (ppm)

# Compound-3ca

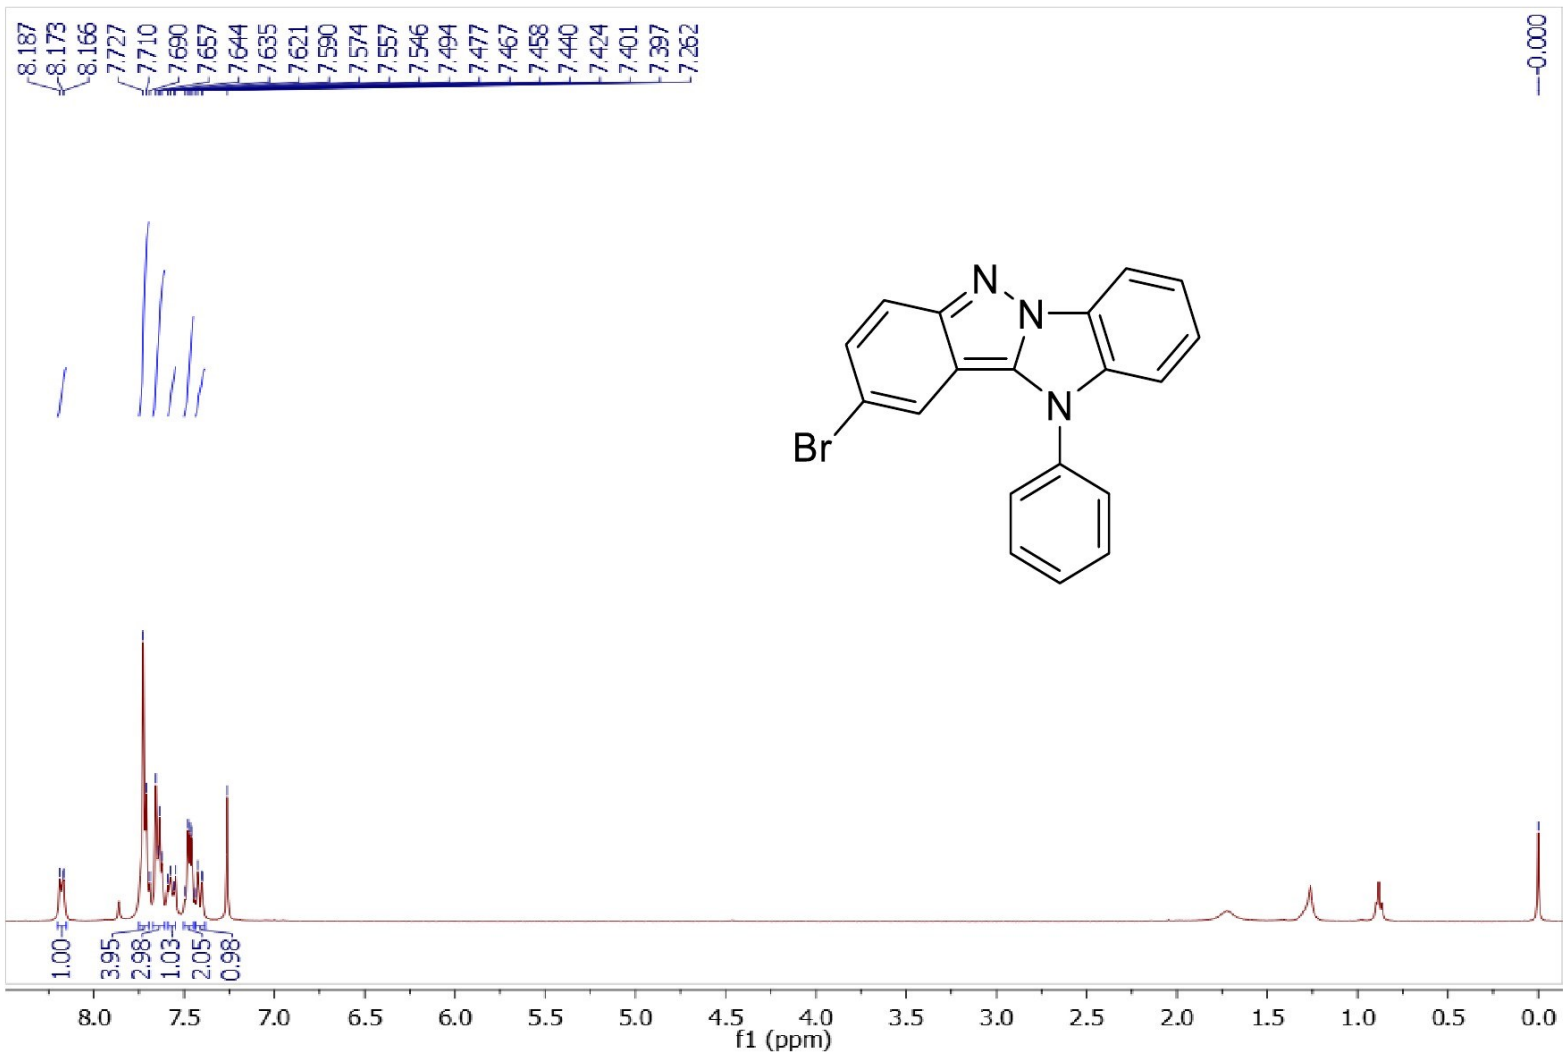

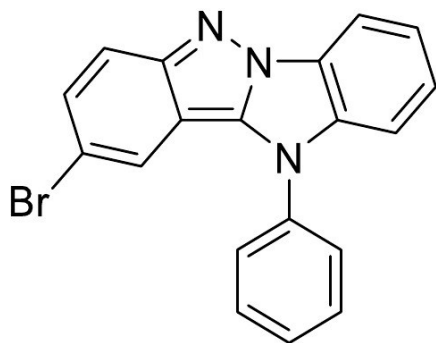

151.85  
135.84  
135.51  
135.09  
130.48  
130.43  
128.52  
128.47  
127.83  
125.84  
125.33  
124.70  
122.58  
121.24  
118.31  
112.44  
111.11  
110.56  
103.95

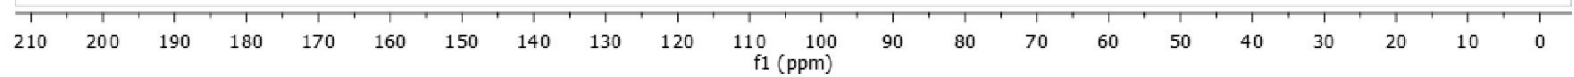

# Compound-1a

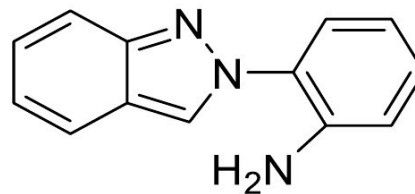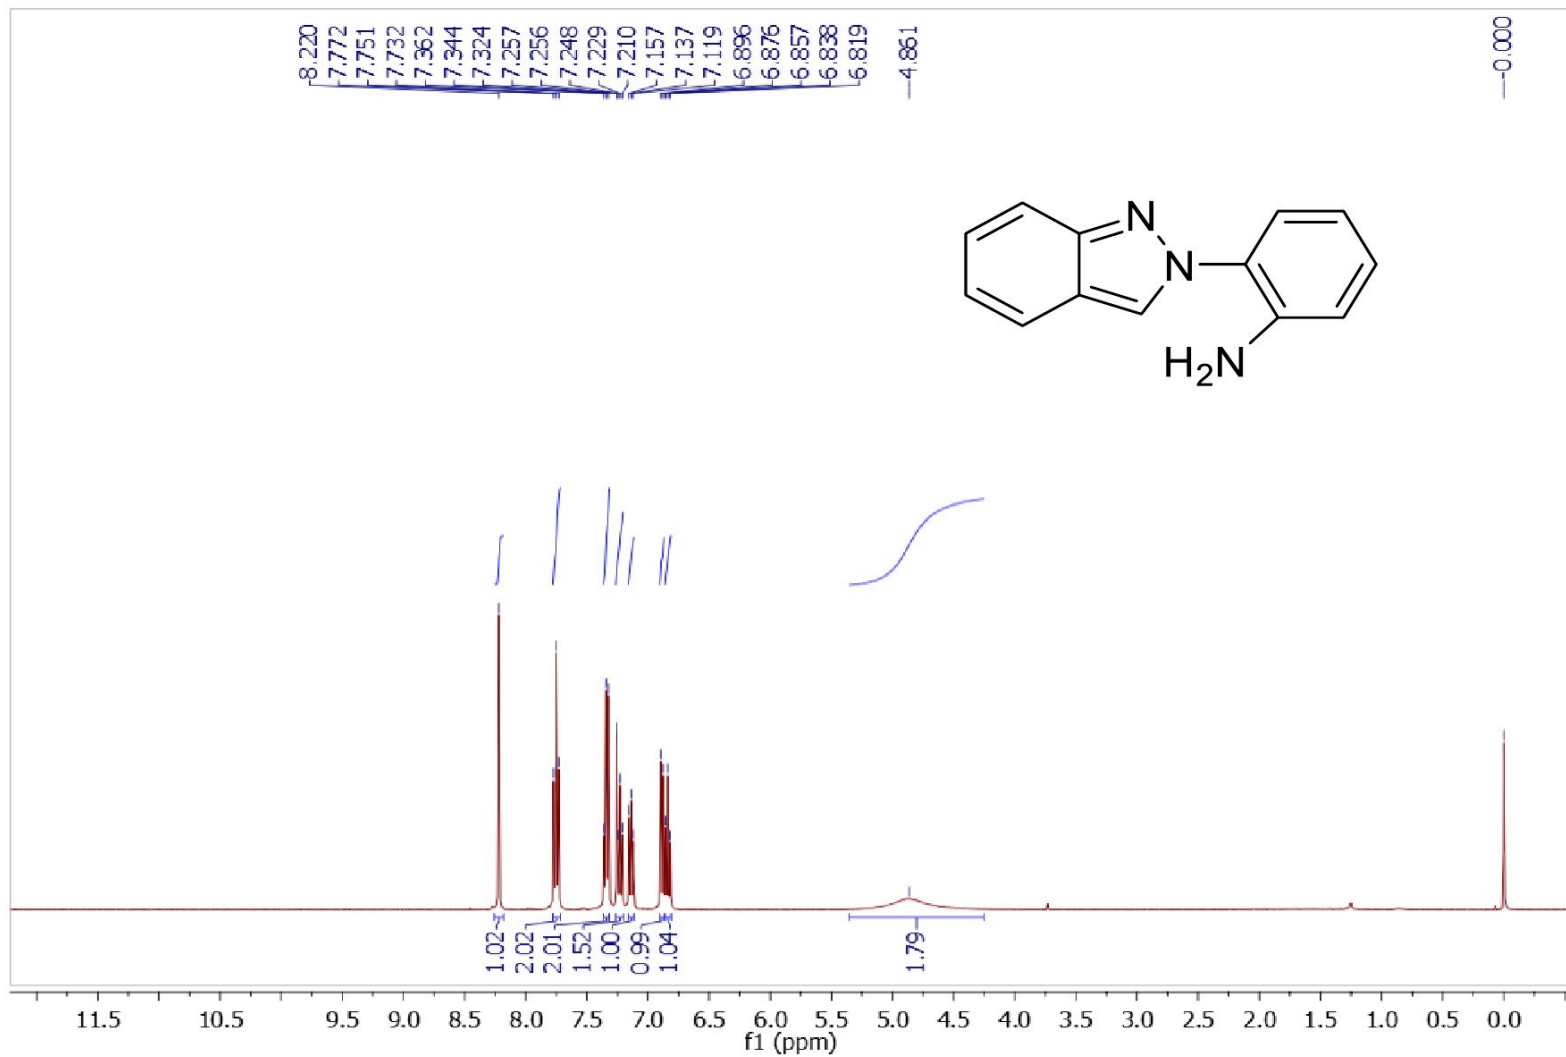

# Compound-1b

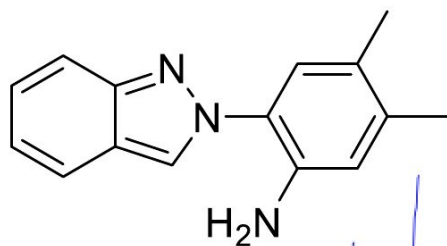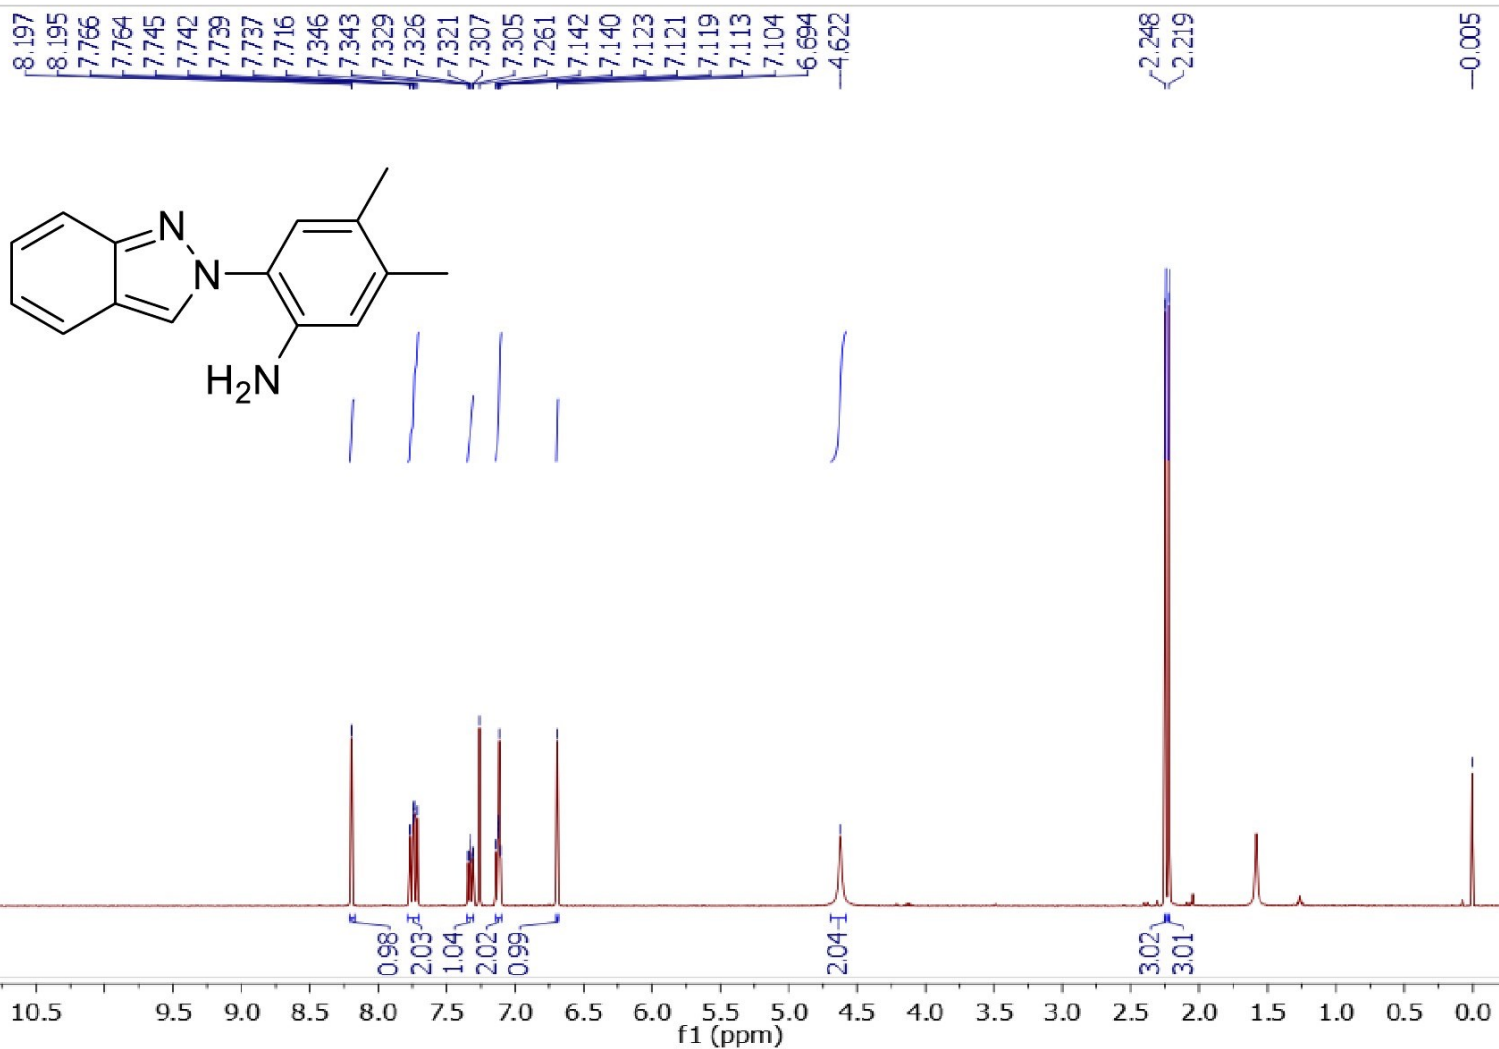

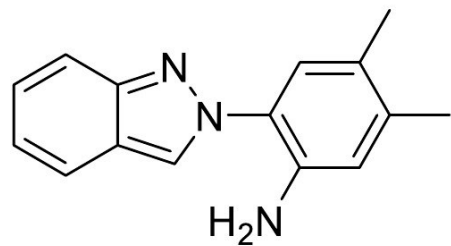

149.41

138.90

138.08

126.46

126.40

125.69

124.50

123.52

122.03

121.82

120.34

118.81

117.51

19.60

18.74

150

140

130

120

110

100

90

80

70

60

50

40

30

20

10

0

f1 (ppm)

# Compound-1c

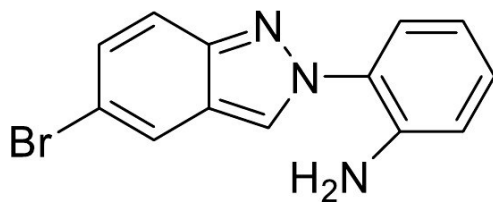

8.162  
8.161  
7.896  
7.893  
7.649  
7.627  
7.401  
7.397  
7.378  
7.374  
7.326  
7.323  
7.306  
7.303  
7.259  
7.251  
7.234  
7.216  
7.213  
6.893  
6.891  
6.873  
6.871  
6.855  
6.852  
6.836  
6.817  
6.814  
4.871

-0.001

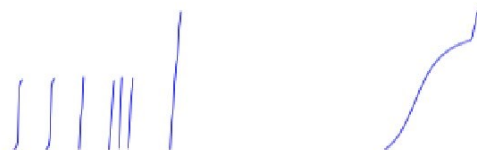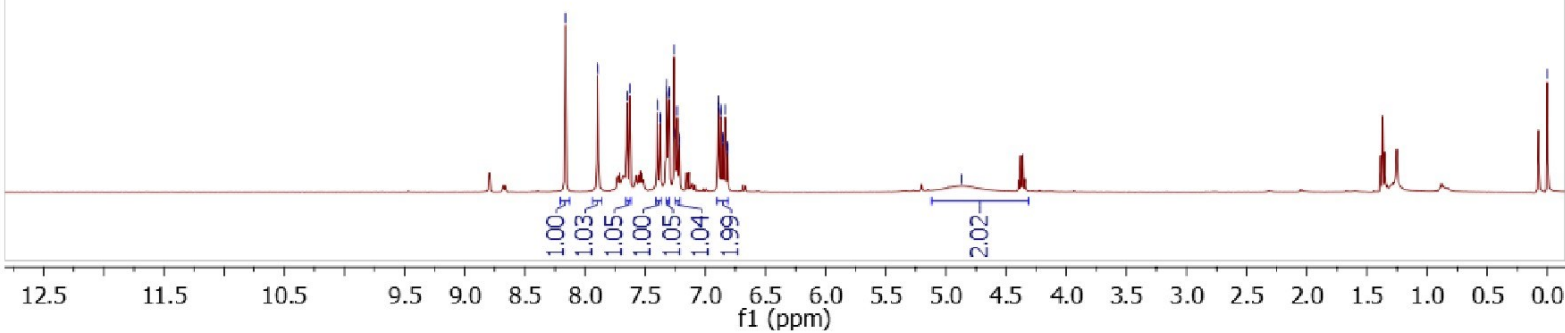

# Compound-1A

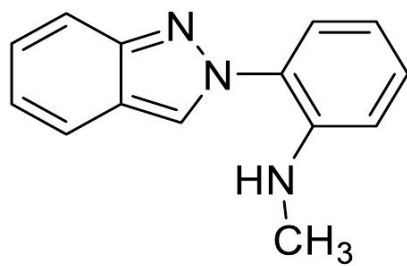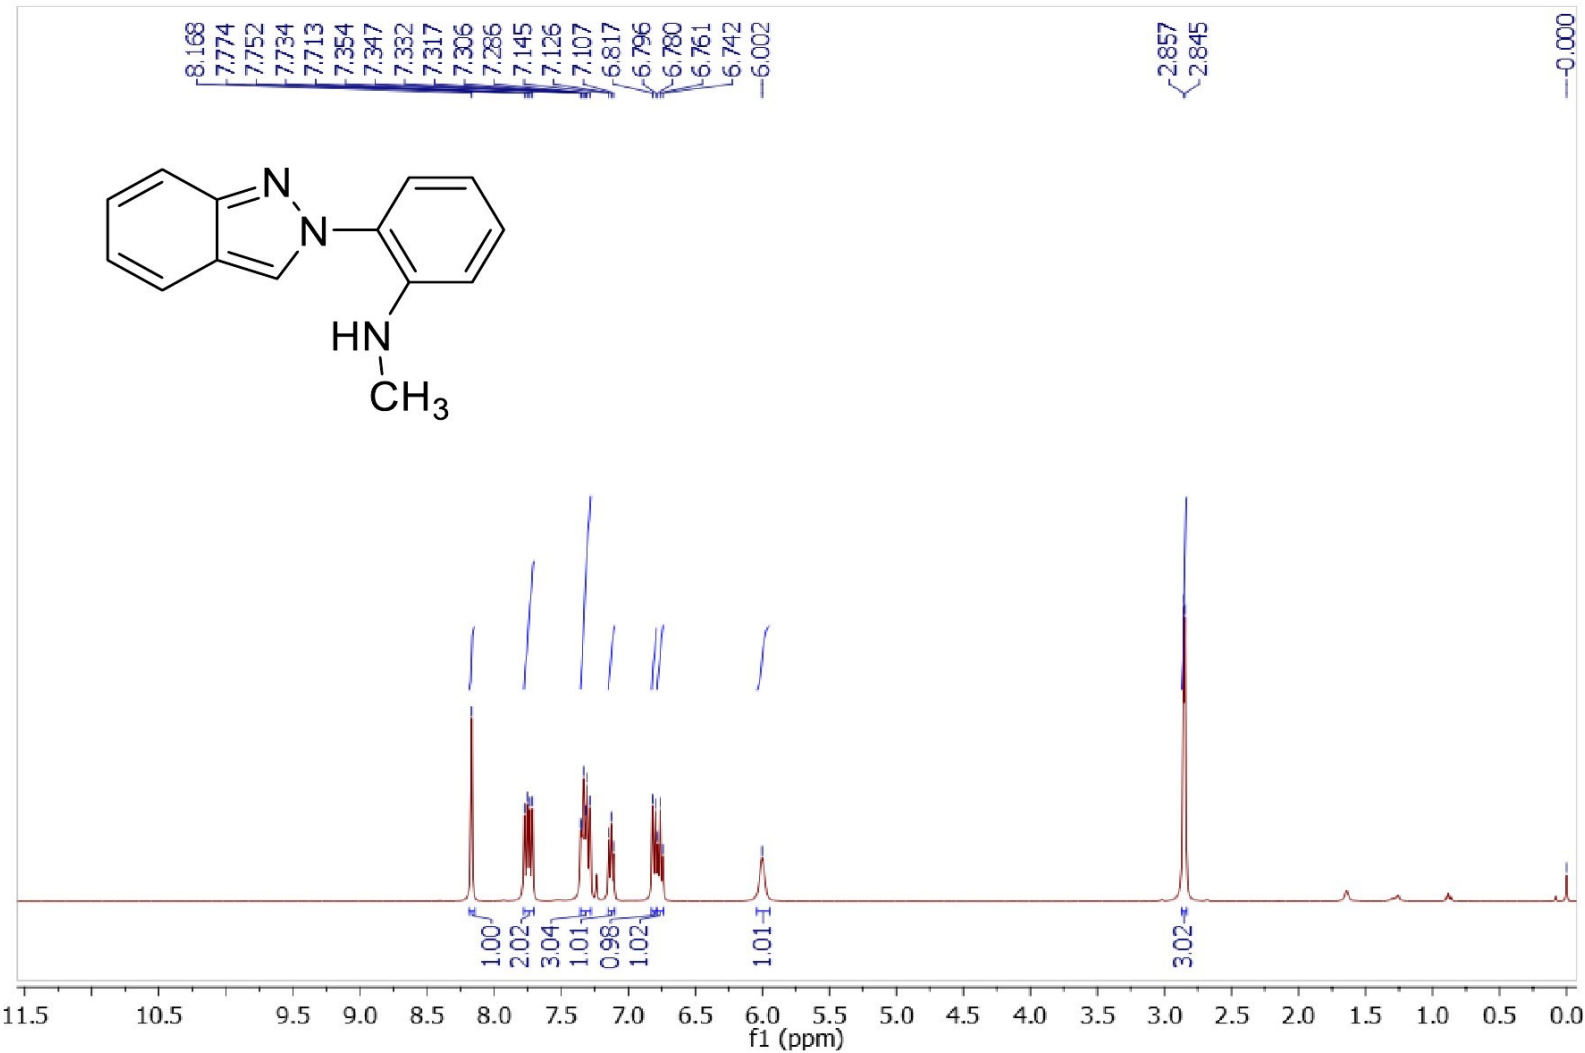

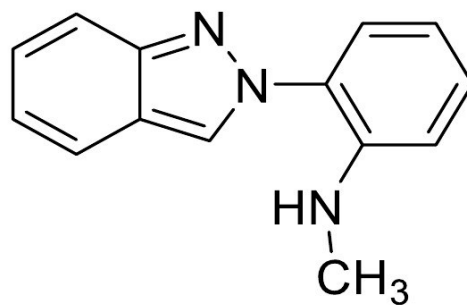

149.54  
143.64  
129.89  
126.69  
126.22  
124.87  
124.06  
122.20  
121.83  
120.40  
117.48  
115.97  
111.61

30.01

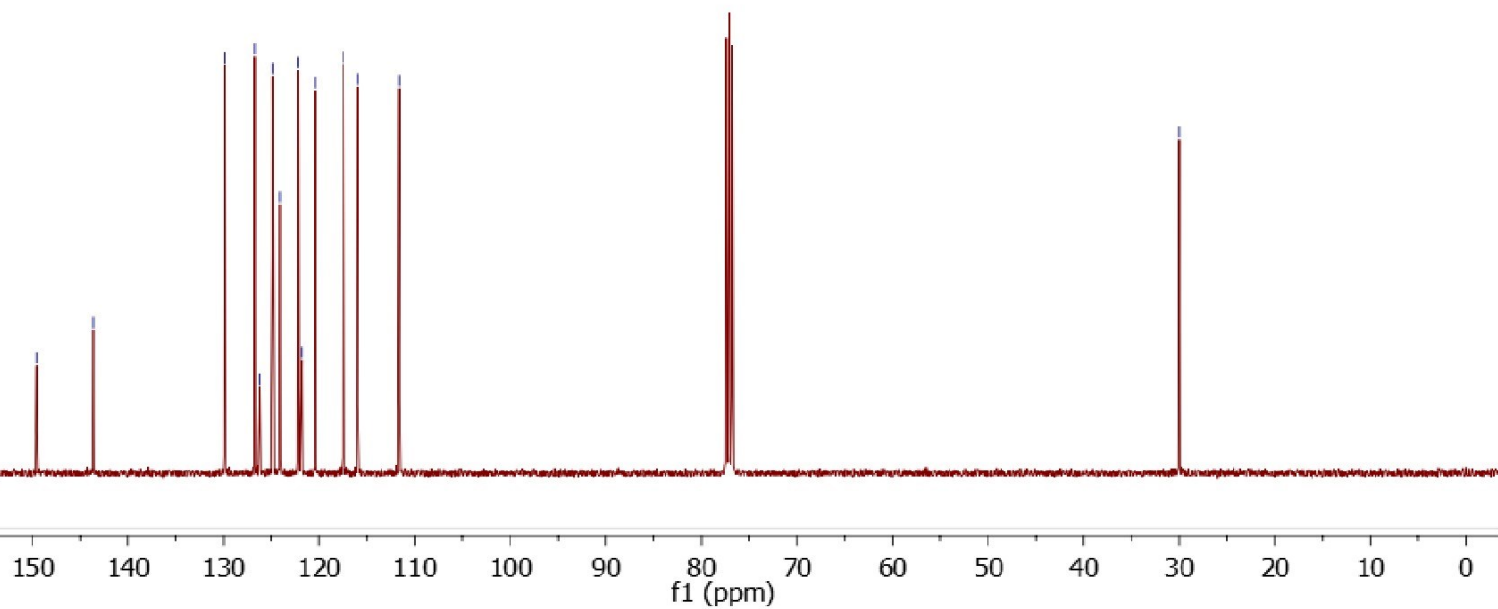

Supplement: d0nj03022h1.pdf [file d0nj03022h1.pdf]
